# Supplementary material for: Cohort study of cardiovascular safety of different COVID-19 vaccination doses among 46 million adults in England
Source: PubMed Central journal article supplement (PMC11291640; doi:10.1038/s41467-024-49634-x), 2024-07-31
Supplement: 41467_2024_49634_MOESM1_ESM.pdf [file 41467_2024_49634_MOESM1_ESM.pdf]

# Cohort study of cardiovascular safety of different COVID-19 vaccination doses among 46 million adults in England

## Contents – Supplementary Tables

|                                                                                                                                                                                                                                                                                                                         |    |
|-------------------------------------------------------------------------------------------------------------------------------------------------------------------------------------------------------------------------------------------------------------------------------------------------------------------------|----|
| Supplementary Table 1: Characterization of the population under study – dose 2 cohort .....                                                                                                                                                                                                                             | 2  |
| Supplementary Table 2: Characterization of the population under study – booster cohort .....                                                                                                                                                                                                                            | 3  |
| Supplementary Table 3: Definitions of the after-vaccination period and the corresponding period before or without vaccination in eligible individuals. The comparator group was chosen to include only those eligible for the specific vaccine brand and dose to assess the added risk of receiving it versus not. .... | 4  |
| Supplementary Table 4: Number of events, person-years and incidence rates for individual arterial and venous thrombotic events, and other cardiovascular events, for first and second vaccinations. ....                                                                                                                | 5  |
| Supplementary Table 5: Number of events, person-years and incidence rates for individual arterial and venous thrombotic events, and other cardiovascular events, for booster vaccination with BNT-162b2. ....                                                                                                           | 6  |
| Supplementary Table 6: Number of events, person-years and incidence rates for individual arterial and venous thrombotic events, and other cardiovascular events, for booster vaccination with mRNA-1273. ....                                                                                                           | 7  |
| Supplementary Table 7: Number of events, person-years and incidence rates for individual arterial and venous thrombotic events, and other cardiovascular events, for booster vaccination with BNT-162b2/ mRNA-1273. ....                                                                                                | 8  |
| Supplementary Table 8: Hazard ratios and 95% CIs for individual arterial and venous thrombotic events, and other cardiovascular events, by time since first dose vaccination with ChAdOx1. ....                                                                                                                         | 9  |
| Supplementary Table 9: Hazard ratios and 95% CIs for individual arterial and venous thrombotic events, and other cardiovascular events, by time since first dose vaccination with BNT-162b2. ....                                                                                                                       | 10 |
| Supplementary Table 10: Hazard ratios and 95% CIs for individual arterial and venous thrombotic events, and other cardiovascular events, by time since first dose vaccination with mRNA-1273. ....                                                                                                                      | 11 |
| Supplementary Table 11: Hazard ratios and 95% CIs for individual arterial and venous thrombotic events, and other cardiovascular events, by time since second dose vaccination for those on a primary course of ChAdOx1. ....                                                                                           | 12 |
| Supplementary Table 12: Hazard ratios and 95% CIs for individual arterial and venous thrombotic events, and other cardiovascular events, by time since second dose vaccination for those on a primary course of BNT-162b2. ....                                                                                         | 13 |
| Supplementary Table 13: Hazard ratios and 95% CIs for individual arterial and venous thrombotic events, and other cardiovascular events, by time since second dose vaccination for those on a primary course of mRNA-1273. ....                                                                                         | 14 |
| Supplementary Table 14: Hazard ratios and 95% CIs for individual arterial and venous thrombotic events, and other cardiovascular events, by time since booster vaccination with mRNA-1273 for those on a primary course of ChAdOx1. ....                                                                                | 15 |
| Supplementary Table 15: Hazard ratios and 95% CIs for individual arterial and venous thrombotic events, and other cardiovascular events, by time since booster vaccination with BNT-162b2 for those on a primary course of ChAdOx1. ....                                                                                | 16 |
| Supplementary Table 16: Hazard ratios and 95% CIs for individual arterial and venous thrombotic events, and other cardiovascular events, by time since booster vaccination with mRNA-1273 or BNT-162b2 for those on a primary course of ChAdOx1. ....                                                                   | 17 |
| Supplementary Table 17: Hazard ratios and 95% CIs for individual arterial and venous thrombotic events, and other cardiovascular events, by time since booster vaccination with BNT-162b2 for those on a primary course of BNT-162b2. ....                                                                              | 18 |
| Supplementary Table 18: Hazard ratios and 95% CIs for individual arterial and venous thrombotic events, and other cardiovascular events, by time since booster vaccination with mRNA-1273 for those on a primary course of BNT-162b2. ....                                                                              | 19 |
| Supplementary Table 19: Hazard ratios and 95% CIs for individual arterial and venous thrombotic events, and other cardiovascular events, by time since booster vaccination with mRNA-1273 or BNT-162b2 for those on a primary course of BNT-162b2. ....                                                                 | 20 |
| Supplementary Table 20: Hazard ratios and 95% CIs for individual arterial and venous thrombotic events, and other cardiovascular events, by time since booster vaccination with mRNA-1273 for those on a primary course of mRNA-1273 or BNT-162b2. ....                                                                 | 21 |
| Supplementary Table 21: Hazard ratios and 95% CIs for individual arterial and venous thrombotic events, and other cardiovascular events, by time since booster vaccination with BNT-162b2 for those on a primary course of mRNA-1273 or BNT-162b2. ....                                                                 | 22 |
| Supplementary Table 22: Hazard ratios and 95% CIs for individual arterial and venous thrombotic events, and other cardiovascular events, by time since booster vaccination with mRNA-1273 or BNT-162b2 for those on a primary course of mRNA-1273 or BNT-162b2. ....                                                    | 23 |
| Supplementary Table 23: Hazard ratios and 95% CIs for individual arterial and venous thrombotic events, and other cardiovascular events, by time since booster vaccination with mRNA-1273 for those on a primary course of ChAdOx1 or mRNA-1273 or BNT-162b2. ....                                                      | 24 |
| Supplementary Table 24: Hazard ratios and 95% CIs for individual arterial and venous thrombotic events, and other cardiovascular events, by time since booster vaccination with BNT-162b2 for those on a primary course of ChAdOx1 or mRNA-1273 or BNT-162b2. ....                                                      | 25 |
| Supplementary Table 25: Hazard ratios and 95% CIs for individual arterial and venous thrombotic events, and other cardiovascular events, by time since booster vaccination with mRNA-1273 or BNT-162b2 for those on a primary course of ChAdOx1 or mRNA-1273 or BNT-162b2. ....                                         | 26 |
| Supplementary Table 26: Subgroup-specific maximally-adjusted hazard ratios and 95% CIs for composite arterial and composite venous events by time since first dose vaccination. ....                                                                                                                                    | 27 |
| Supplementary Table 27: Subgroup-specific maximally-adjusted hazard ratios and 95% CIs for composite arterial and composite venous events by time since COVID-19 dose 1&2 vaccination. ....                                                                                                                             | 28 |
| Supplementary Table 28: Subgroup-specific maximally-adjusted hazard ratios and 95% CIs for composite arterial and composite venous events by time since booster vaccination with BNT-162b2 or mRNA-1273 for those on a primary course of ChAdOx1. ....                                                                  | 29 |
| Supplementary Table 29: Subgroup-specific maximally-adjusted hazard ratios and 95% CIs for composite arterial and composite venous events by time since booster with BNT-162b2 or mRNA-1273 for those on a primary course of BNT-162b2. ....                                                                            | 30 |
| Supplementary Table 30: Associations of COVID-19 vaccination brand and dose with myocarditis and pericarditis until the CDC's Announcement on 17 May 2021. ....                                                                                                                                                         | 31 |

## Contents – Supplementary Figures

|                                                                                                                                                                 |    |
|-----------------------------------------------------------------------------------------------------------------------------------------------------------------|----|
| Supplementary Figure 1: Consort Flow Diagram for Population Inclusion/Exclusion Criteria* .....                                                                 | 32 |
| Supplementary Figure 2: Subgroup-specific maximally-adjusted hazard ratios for a composite arterial event by time since dose 1 vaccination .....                | 33 |
| Supplementary Figure 3: Subgroup-specific maximally-adjusted hazard ratios for a composite venous event by time since dose 1 vaccination .....                  | 34 |
| Supplementary Figure 4: Subgroup-specific maximally-adjusted hazard ratios for a composite arterial event by time since second dose vaccination .....           | 35 |
| Supplementary Figure 5: Subgroup-specific maximally-adjusted hazard ratios for a composite venous event by time since second dose vaccination .....             | 36 |
| Supplementary Figure 6: Subgroup-specific maximally-adjusted hazard ratios for a composite arterial event by time since booster vaccination .....               | 37 |
| Supplementary Figure 7: Subgroup-specific maximally-adjusted hazard ratios for a composite venous event by time since booster vaccination .....                 | 38 |
| Supplementary Figure 8: Associations of COVID-19 vaccination brand and dose with myocarditis and pericarditis until the CDC's Announcement on 17 May 2021. .... | 39 |

## Supplementary Tables

Supplementary Table 1: Characterization of the population under study – dose 2 cohort<sup>1</sup>

| N (%)                                                                                     | All                      | Those receiving dose 1 and eligible for dose 2 analysis |                      | Vaccination status during dose 2 follow-up |                   |                |
|-------------------------------------------------------------------------------------------|--------------------------|---------------------------------------------------------|----------------------|--------------------------------------------|-------------------|----------------|
|                                                                                           |                          |                                                         | Remains unvaccinated | ChAdOx1                                    | BNT-162b2         | mRNA-1273      |
|                                                                                           |                          | 37249850                                                | 1396730 (3.75%)      | 18920225 (50.78%)                          | 15961330 (42.85%) | 971565 (2.61%) |
| <b>Sex (%)</b>                                                                            | Male                     | 17888920(48.02%)                                        | 719560(51.52%)       | 9228065(48.77%)                            | 7412120(46.44%)   | 529175(54.47%) |
|                                                                                           | Female                   | 19360930(51.98%)                                        | 677175(48.48%)       | 9692160(51.23%)                            | 8549210(53.56%)   | 442385(45.53%) |
| <b>Age in years (%)</b>                                                                   | 18-29                    | 5550865(14.90%)                                         | 480405(34.39%)       | 882970(4.67%)                              | 3805665(23.84%)   | 381825(39.30%) |
|                                                                                           | 30-39                    | 5999655(16.11%)                                         | 361120(25.85%)       | 1423090(7.52%)                             | 3854395(24.15%)   | 361050(37.16%) |
|                                                                                           | 40-49                    | 6070750(16.30%)                                         | 221850(15.88%)       | 4025920(21.28%)                            | 1623400(10.17%)   | 199580(20.54%) |
|                                                                                           | 50-59                    | 6875270(18.46%)                                         | 136810(9.80%)        | 5233520(27.66%)                            | 1480915(9.28%)    | 24025(2.47%)   |
|                                                                                           | 60-69                    | 5530990(14.85%)                                         | 69350(4.97%)         | 3846470(20.33%)                            | 1611345(10.10%)   | 3825(0.39%)    |
|                                                                                           | 70-79                    | 4518335(12.13%)                                         | 48695(3.49%)         | 2660010(14.06%)                            | 1808640(11.33%)   | 990(0.10%)     |
|                                                                                           | 80-89                    | 2196915(5.90%)                                          | 48720(3.49%)         | 641655(3.39%)                              | 1506310(9.44%)    | 230(0.02%)     |
|                                                                                           | 90+                      | 507075(1.36%)                                           | 29785(2.13%)         | 206590(1.09%)                              | 270660(1.70%)     | 40(0.00%)      |
| <b>Ethnicity (%)</b>                                                                      | Asian                    | 2884895(7.74%)                                          | 162750(11.65%)       | 1283255(6.78%)                             | 1371315(8.59%)    | 67575(6.96%)   |
|                                                                                           | Black                    | 1023140(2.75%)                                          | 95765(6.86%)         | 469890(2.48%)                              | 431060(2.70%)     | 26425(2.72%)   |
|                                                                                           | Mixed                    | 468270(1.26%)                                           | 32965(2.36%)         | 189925(1.00%)                              | 225715(1.41%)     | 19665(2.02%)   |
|                                                                                           | Other                    | 821435(2.21%)                                           | 45150(3.23%)         | 352840(1.86%)                              | 390235(2.44%)     | 33210(3.42%)   |
|                                                                                           | White                    | 31194135(83.74%)                                        | 1026695(73.51%)      | 16202960(85.64%)                           | 13174825(82.54%)  | 789655(81.28%) |
|                                                                                           | Unknown/Missing          | 857975(2.30%)                                           | 33405(2.39%)         | 421355(2.23%)                              | 368180(2.31%)     | 35035(3.61%)   |
| <b>Index of multiple deprivation (%) (lowest: most deprived; highest: last deprived).</b> | 1-2                      | 6449310(17.31%)                                         | 425815(30.49%)       | 3159100(16.70%)                            | 2710950(16.98%)   | 153445(15.79%) |
|                                                                                           | 3-4                      | 7051080(18.93%)                                         | 322220(23.07%)       | 3482570(18.41%)                            | 3057105(19.15%)   | 189185(19.47%) |
|                                                                                           | 5-6                      | 7396000(19.86%)                                         | 246955(17.68%)       | 3773515(19.94%)                            | 3186060(19.96%)   | 189470(19.50%) |
|                                                                                           | 7-8                      | 7509665(20.16%)                                         | 196015(14.03%)       | 3931440(20.78%)                            | 3195500(20.02%)   | 186710(19.22%) |
|                                                                                           | 9-10                     | 7498225(20.13%)                                         | 150785(10.80%)       | 4029670(21.30%)                            | 3123915(19.57%)   | 193855(19.95%) |
|                                                                                           | Missing                  | 1345575(3.61%)                                          | 54945(3.93%)         | 543935(2.87%)                              | 687795(4.31%)     | 58900(6.06%)   |
| <b>Smoking status (%)</b>                                                                 | Current smoker           | 5538335(14.87%)                                         | 406905(29.13%)       | 2847490(15.05%)                            | 2130020(13.34%)   | 153920(15.84%) |
|                                                                                           | Former smoker            | 9241400(24.81%)                                         | 241280(17.27%)       | 5200055(27.48%)                            | 3647345(22.85%)   | 152720(15.72%) |
|                                                                                           | Never smoker             | 21262705(57.08%)                                        | 643395(46.06%)       | 10612005(56.09%)                           | 9425100(59.05%)   | 582205(59.92%) |
|                                                                                           | Missing                  | 1207410(3.24%)                                          | 105160(7.53%)        | 260670(1.38%)                              | 758865(4.75%)     | 82715(8.51%)   |
| <b>Medical history (%)</b>                                                                | AMI <sup>2</sup>         | 1093820(2.94%)                                          | 31955(2.29%)         | 559340(2.96%)                              | 501770(3.14%)     | 755(0.08%)     |
|                                                                                           | Diabetes                 | 3692865(9.91%)                                          | 91845(6.58%)         | 1995145(10.55%)                            | 1597505(10.01%)   | 8370(0.86%)    |
|                                                                                           | Depression               | 8243045(22.13%)                                         | 376580(26.96%)       | 4503280(23.80%)                            | 3208995(20.10%)   | 154190(15.87%) |
|                                                                                           | Obesity                  | 4100435(11.01%)                                         | 131055(9.38%)        | 2293750(12.12%)                            | 1633780(10.24%)   | 41850(4.31%)   |
|                                                                                           | Cancer                   | 6573585(17.65%)                                         | 199295(14.27%)       | 3353165(17.72%)                            | 2895650(18.14%)   | 125475(12.91%) |
|                                                                                           | COPD <sup>3</sup>        | 1450370(3.89%)                                          | 48730(3.49%)         | 778620(4.12%)                              | 621455(3.89%)     | 1565(0.16%)    |
|                                                                                           | Liver disease            | 199445(0.54%)                                           | 10935(0.78%)         | 114865(0.61%)                              | 73055(0.46%)      | 590(0.06%)     |
|                                                                                           | Chronic kidney disease   | 2705645(7.26%)                                          | 88060(6.30%)         | 1327490(7.02%)                             | 1285020(8.05%)    | 5075(0.52%)    |
|                                                                                           | Dementia                 | 476175(1.28%)                                           | 32680(2.34%)         | 256330(1.35%)                              | 187000(1.17%)     | 165(0.02%)     |
|                                                                                           | All stroke               | 783260(2.10%)                                           | 27395(1.96%)         | 415770(2.20%)                              | 339285(2.13%)     | 810(0.08%)     |
|                                                                                           | All VTE <sup>4</sup>     | 595620(1.60%)                                           | 26065(1.87%)         | 326365(1.72%)                              | 241500(1.51%)     | 1690(0.17%)    |
|                                                                                           | Thrombophilia            | 39750(0.11%)                                            | 1980(0.14%)          | 20235(0.11%)                               | 17045(0.11%)      | 490(0.05%)     |
| <b>Major surgery in the last year (%)</b>                                                 |                          | 3437715(9.23%)                                          | 168895(12.09%)       | 1640430(8.67%)                             | 1571940(9.85%)    | 56450(5.81%)   |
| <b>Number of unique diseases in the last year (%)</b>                                     | 0                        | 29316520(78.70%)                                        | 1098255(78.63%)      | 14829750(78.38%)                           | 12523280(78.46%)  | 865235(89.06%) |
|                                                                                           | 1-5                      | 7813000(20.97%)                                         | 290240(20.78%)       | 4024950(21.27%)                            | 3391655(21.25%)   | 106155(10.93%) |
|                                                                                           | 6+                       | 120325(0.32%)                                           | 8230(0.59%)          | 65525(0.35%)                               | 46395(0.29%)      | 175(0.02%)     |
| <b>Region (%)</b>                                                                         | Northwest                | 4707445(12.64%)                                         | 206320(14.77%)       | 2379905(12.58%)                            | 2009445(12.59%)   | 111775(11.50%) |
|                                                                                           | Southeast                | 5674540(15.23%)                                         | 174660(12.50%)       | 2985210(15.78%)                            | 2332460(14.61%)   | 182210(18.75%) |
|                                                                                           | London                   | 5090755(13.67%)                                         | 237995(17.04%)       | 2323565(12.28%)                            | 2366165(14.82%)   | 163030(16.78%) |
|                                                                                           | East of England          | 3439310(9.23%)                                          | 115845(8.29%)        | 1814770(9.59%)                             | 1422585(8.91%)    | 86110(8.86%)   |
|                                                                                           | Southwest                | 3167450(8.50%)                                          | 92920(6.65%)         | 1607885(8.50%)                             | 1374400(8.61%)    | 92245(9.49%)   |
|                                                                                           | Yorkshire and the Humber | 3577500(9.60%)                                          | 140990(10.09%)       | 1876865(9.92%)                             | 1453235(9.10%)    | 106410(10.95%) |
|                                                                                           | East Midlands            | 2679760(7.19%)                                          | 86955(6.23%)         | 1423665(7.52%)                             | 1158690(7.26%)    | 10450(1.08%)   |
|                                                                                           | West Midlands            | 3688035(9.90%)                                          | 154580(11.07%)       | 1913485(10.11%)                            | 1553840(9.74%)    | 66130(6.81%)   |
|                                                                                           | Northeast                | 1444085(3.88%)                                          | 58705(4.20%)         | 748500(3.96%)                              | 602465(3.77%)     | 34415(3.54%)   |
|                                                                                           | Missing                  | 3780970(10.15%)                                         | 127760(9.15%)        | 1846375(9.76%)                             | 1688050(10.58%)   | 118785(12.23%) |
| <b>Prior COVID-19 at index date</b>                                                       |                          | 2496910 (6.7%)                                          | 2496430(6.70%)       | 191945(13.74%)                             | 1143330(6.04%)    | 1080500(6.77%) |
| <b>Medications taken in the last 3 months</b>                                             | Antiplatelet             | 2341770(6.29%)                                          | 50545(3.62%)         | 1196220(6.32%)                             | 1092935(6.85%)    | 2070(0.21%)    |
|                                                                                           | Blood pressure lowering  | 8099995(21.75%)                                         | 137045(9.81%)        | 4493750(23.75%)                            | 3454860(21.65%)   | 14340(1.48%)   |
|                                                                                           | Lipid lowering           | 6475470(17.38%)                                         | 95400(6.83%)         | 3544760(18.74%)                            | 2829820(17.73%)   | 5490(0.57%)    |
|                                                                                           | Anticoagulant            | 1263200(3.39%)                                          | 35330(2.53%)         | 609895(3.22%)                              | 617300(3.87%)     | 675(0.07%)     |
|                                                                                           | COPD <sup>3</sup>        | 498145(1.34%)                                           | 17425(1.25%)         | 132500(0.70%)                              | 320785(2.01%)     | 27435(2.82%)   |
|                                                                                           | HRT <sup>5</sup>         | 513580(1.38%)                                           | 7435(0.53%)          | 348935(1.84%)                              | 153750(0.96%)     | 3460(0.36%)    |
| <b>Clinically vulnerable status</b>                                                       | Neither                  | 27913300(74.94%)                                        | 1139475(81.58%)      | 13868865(73.30%)                           | 11952700(74.89%)  | 952260(98.01%) |
|                                                                                           | Vulnerable               | 7372580(19.79%)                                         | 195030(13.96%)       | 3987980(21.08%)                            | 3172470(19.88%)   | 17100(1.76%)   |
|                                                                                           | Extremely vulnerable     | 1963965(5.27%)                                          | 62220(4.45%)         | 1063380(5.62%)                             | 836160(5.24%)     | 2205(0.23%)    |

<sup>1</sup>All counts rounded to the nearest 5 and counts less than 10 displayed as '10'

<sup>2</sup> Acute myocardial infarction

<sup>3</sup> Combined oral contraceptives

<sup>4</sup> Venous Thromboembolic Event

<sup>5</sup> Hormone replacement therapy

Supplementary Table 2: Characterization of the population under study – booster cohort<sup>1</sup>

|                                                                                           |                            | Those receiving dose 2 and eligible for booster analysis | Vaccination status during booster follow-up |                 |                   |                  |
|-------------------------------------------------------------------------------------------|----------------------------|----------------------------------------------------------|---------------------------------------------|-----------------|-------------------|------------------|
|                                                                                           |                            |                                                          | Remains unvaccinated                        | ChAdOx1         | BNT-162b2         | mRNA-1273        |
| <b>N (%)</b>                                                                              | All                        | 35853120                                                 | 7412330 (20.68%)                            | 29885 (0.08%)   | 22085440 (61.59%) | 6325465 (17.64%) |
| <b>Sex (%)</b>                                                                            | Male                       | 17169360(47.89%)                                         | 3736285(50.41%)                             | 8745(29.26%)    | 10209690(46.23%)  | 3214640(50.82%)  |
|                                                                                           | Female                     | 18683760(52.11%)                                         | 3676045(49.59%)                             | 21140(70.74%)   | 11875750(53.77%)  | 3110825(49.18%)  |
| <b>Age in years (%)</b>                                                                   | 18-29                      | 5045220(14.07%)                                          | 2339935(31.57%)                             | 830(2.78%)      | 1897980(8.59%)    | 806475(12.75%)   |
|                                                                                           | 30-39                      | 5641140(15.73%)                                          | 2014015(27.17%)                             | 1480(4.95%)     | 2555375(11.57%)   | 1070270(16.92%)  |
|                                                                                           | 40-49                      | 5844890(16.30%)                                          | 1356315(18.30%)                             | 3165(10.59%)    | 3119305(14.12%)   | 1366105(21.60%)  |
|                                                                                           | 50-59                      | 6741615(18.80%)                                          | 867965(11.71%)                              | 5715(19.12%)    | 4210800(19.07%)   | 1657135(26.20%)  |
|                                                                                           | 60-69                      | 5473745(15.27%)                                          | 394340(5.32%)                               | 6000(20.08%)    | 4010445(18.16%)   | 1062960(16.80%)  |
|                                                                                           | 70-79                      | 4471075(12.47%)                                          | 207090(2.79%)                               | 6345(21.23%)    | 3971030(17.98%)   | 286610(4.53%)    |
|                                                                                           | 80-89                      | 2134350(5.95%)                                           | 157045(2.12%)                               | 4425(14.81%)    | 1911150(8.65%)    | 61730(0.98%)     |
|                                                                                           | 90+                        | 501085(1.40%)                                            | 75625(1.02%)                                | 1930(6.46%)     | 409355(1.85%)     | 14175(0.22%)     |
| <b>Ethnicity (%)</b>                                                                      | Asian                      | 2722145(7.59%)                                           | 968180(13.06%)                              | 1235(4.13%)     | 1387480(6.28%)    | 365250(5.77%)    |
|                                                                                           | Black                      | 927380(2.59%)                                            | 420175(5.67%)                               | 1290(4.32%)     | 405225(1.83%)     | 100690(1.59%)    |
|                                                                                           | Mixed                      | 435305(1.21%)                                            | 155745(2.10%)                               | 335(1.12%)      | 211630(0.96%)     | 67595(1.07%)     |
|                                                                                           | Other                      | 776285(2.17%)                                            | 256530(3.46%)                               | 500(1.67%)      | 389265(1.76%)     | 129990(2.06%)    |
|                                                                                           | White                      | 30167440(84.14%)                                         | 5420120(73.12%)                             | 26260(87.87%)   | 19230570(87.07%)  | 5490490(86.80%)  |
|                                                                                           | Unknown/Missing            | 824565(2.30%)                                            | 191585(2.58%)                               | 260(0.87%)      | 461270(2.09%)     | 171450(2.71%)    |
| <b>Index of multiple deprivation (%) (lowest: most deprived; highest: last deprived).</b> | 1-2                        | 6052625(16.88%)                                          | 1902305(25.66%)                             | 4990(16.70%)    | 3285255(14.88%)   | 860075(13.60%)   |
|                                                                                           | 3-4                        | 6764755(18.87%)                                          | 1693300(22.84%)                             | 6180(20.68%)    | 3942245(17.85%)   | 1123030(17.75%)  |
|                                                                                           | 5-6                        | 7190695(20.06%)                                          | 1383720(18.67%)                             | 6240(20.88%)    | 4504560(20.40%)   | 1296175(20.49%)  |
|                                                                                           | 7-8                        | 7353800(20.51%)                                          | 1180665(15.93%)                             | 6050(20.24%)    | 4780705(21.65%)   | 1386380(21.92%)  |
|                                                                                           | 9-10                       | 7383720(20.59%)                                          | 977420(13.19%)                              | 5710(19.11%)    | 4953800(22.43%)   | 1446790(22.87%)  |
|                                                                                           | Missing                    | 1107525(3.09%)                                           | 274920(3.71%)                               | 715(2.39%)      | 618880(2.80%)     | 213010(3.37%)    |
| <b>Smoking status (%)</b>                                                                 | Current smoker             | 5111815(14.26%)                                          | 1610865(21.73%)                             | 3655(12.23%)    | 2646775(11.98%)   | 850520(13.45%)   |
|                                                                                           | Former smoker              | 9034100(25.20%)                                          | 1319225(17.80%)                             | 9080(30.38%)    | 6207435(28.11%)   | 1498360(23.69%)  |
|                                                                                           | Never smoker               | 20644655(57.58%)                                         | 3998635(53.95%)                             | 16945(56.70%)   | 12830630(58.10%)  | 3798445(60.05%)  |
|                                                                                           | Missing                    | 1062550(2.96%)                                           | 483610(6.52%)                               | 205(0.69%)      | 400595(1.81%)     | 178140(2.82%)    |
|                                                                                           | <b>Medical history (%)</b> | AMI <sup>2</sup>                                         | 1080380(3.01%)                              | 118400(1.60%)   | 2100(7.03%)       | 861210(3.90%)    |
| Diabetes                                                                                  | 3707900(10.34%)            | 448405(6.05%)                                            | 6070(20.31%)                                | 2807670(12.71%) | 445755(7.05%)     |                  |
| Depression                                                                                | 7938700(22.14%)            | 1578615(21.30%)                                          | 9540(31.92%)                                | 4992600(22.61%) | 1357945(21.47%)   |                  |
| Obesity                                                                                   | 4043865(11.28%)            | 631995(8.53%)                                            | 6085(20.36%)                                | 2778290(12.58%) | 627495(9.92%)     |                  |
| Cancer                                                                                    | 6774230(18.89%)            | 1138520(15.36%)                                          | 7300(24.43%)                                | 4489645(20.33%) | 1138765(18.00%)   |                  |
| COPD <sup>3</sup>                                                                         | 1419320(3.96%)             | 171690(2.32%)                                            | 3495(11.69%)                                | 1122390(5.08%)  | 121745(1.92%)     |                  |
| Liver disease                                                                             | 193460(0.54%)              | 35640(0.48%)                                             | 400(1.34%)                                  | 134150(0.61%)   | 23270(0.37%)      |                  |
| Chronic kidney disease                                                                    | 2675750(7.46%)             | 298285(4.02%)                                            | 6275(21.00%)                                | 2164190(9.80%)  | 207000(3.27%)     |                  |
| Dementia                                                                                  | 465740(1.30%)              | 82695(1.12%)                                             | 1660(5.55%)                                 | 362440(1.64%)   | 18945(0.30%)      |                  |
| All stroke                                                                                | 770990(2.15%)              | 91440(1.23%)                                             | 2050(6.86%)                                 | 608950(2.76%)   | 68550(1.08%)      |                  |
| All VTE <sup>4</sup>                                                                      | 582505(1.62%)              | 79595(1.07%)                                             | 1400(4.68%)                                 | 436130(1.97%)   | 65380(1.03%)      |                  |
| Thrombophilia                                                                             | 38600(0.11%)               | 6535(0.09%)                                              | 125(0.42%)                                  | 26350(0.12%)    | 5590(0.09%)       |                  |
| <b>Major surgery in the last year (%)</b>                                                 |                            | 3362750(9.38%)                                           | 631360(8.52%)                               | 5150(17.23%)    | 2263465(10.25%)   | 462775(7.32%)    |
| <b>Number of unique diseases in the last year (%)</b>                                     | 0                          | 28248440 (78.8%)                                         | 6112540(82.46%)                             | 18410(61.60%)   | 16858570(76.33%)  | 5258620(83.13%)  |
|                                                                                           | 1-5                        | 7488270 (20.9%)                                          | 1278925(17.25%)                             | 11095(37.13%)   | 5139995(23.27%)   | 1057700(16.72%)  |
|                                                                                           | 6+                         | 117375 (0.33%)                                           | 20860(0.28%)                                | 380(1.27%)      | 86880(0.39%)      | 9145(0.14%)      |
| <b>Region (%)</b>                                                                         | Northwest                  | 4518635(12.60%)                                          | 1038860(14.02%)                             | 3535(11.83%)    | 2816415(12.75%)   | 659825(10.43%)   |
|                                                                                           | Southeast                  | 5527815(15.42%)                                          | 926770(12.50%)                              | 4835(16.18%)    | 3874390(17.54%)   | 721820(11.41%)   |
|                                                                                           | London                     | 4878390(13.61%)                                          | 1387180(18.71%)                             | 7960(26.64%)    | 2681425(12.14%)   | 801825(12.68%)   |
|                                                                                           | East of England            | 3348085(9.34%)                                           | 624965(8.43%)                               | 2140(7.16%)     | 1948720(8.82%)    | 772260(12.21%)   |
|                                                                                           | Southwest                  | 3093925(8.63%)                                           | 493055(6.65%)                               | 2920(9.77%)     | 1938650(8.78%)    | 659300(10.42%)   |
|                                                                                           | Yorkshire and the Humber   | 3454215(9.63%)                                           | 722215(9.74%)                               | 1765(5.91%)     | 2090985(9.47%)    | 639250(10.11%)   |
|                                                                                           | East Midlands              | 2608510(7.28%)                                           | 491845(6.64%)                               | 1655(5.54%)     | 1662850(7.53%)    | 452160(7.15%)    |
|                                                                                           | West Midlands              | 3547765(9.90%)                                           | 771940(10.41%)                              | 2110(7.06%)     | 2302170(10.42%)   | 471545(7.45%)    |
|                                                                                           | Northeast                  | 1391090(3.88%)                                           | 287400(3.88%)                               | 880(2.94%)      | 700975(3.17%)     | 401835(6.35%)    |
|                                                                                           | Missing                    | 3484695(9.72%)                                           | 668115(9.01%)                               | 2080(6.96%)     | 2068850(9.37%)    | 745650(11.79%)   |
| <b>Prior COVID-19 at index date</b>                                                       |                            | 2792305 (7.79%)                                          | 928585(12.53%)                              | 1840(6.16%)     | 1406635(6.37%)    | 455075(7.19%)    |
| <b>Medications taken in the last 3 months</b>                                             | Antiplatelet               | 2309730 (6.44%)                                          | 206265(2.78%)                               | 4175(13.97%)    | 1891195(8.56%)    | 207940(3.29%)    |
|                                                                                           | Blood pressure lowering    | 8040690 (22.4%)                                          | 671460(9.06%)                               | 12155(40.67%)   | 6423250(29.08%)   | 933450(14.76%)   |
|                                                                                           | Lipid lowering             | 6461885 (18.0%)                                          | 483320(6.52%)                               | 8840(29.58%)    | 5280190(23.91%)   | 689315(10.90%)   |
|                                                                                           | Anticoagulant              | 1261465 (3.52%)                                          | 114650(1.55%)                               | 2735(9.15%)     | 1048740(4.75%)    | 95165(1.50%)     |
|                                                                                           | COCP <sup>3</sup>          | 468320 (1.31%)                                           | 144360(1.95%)                               | 155(0.52%)      | 231030(1.05%)     | 92775(1.47%)     |
|                                                                                           | HRT <sup>5</sup>           | 536220 (1.50%)                                           | 48810(0.66%)                                | 850(2.84%)      | 372085(1.68%)     | 114470(1.81%)    |
| <b>Clinically vulnerable status</b>                                                       | Neither                    | 26773975 (74.7%)                                         | 6295975(84.94%)                             | 13825(46.26%)   | 15149610(68.60%)  | 5314410(84.02%)  |
|                                                                                           | Vulnerable                 | 7178100 (20.0%)                                          | 881140(11.89%)                              | 9965(33.34%)    | 5408025(24.49%)   | 878420(13.89%)   |
|                                                                                           | Extremely vulnerable       | 1902015 (5.30%)                                          | 235210(3.17%)                               | 6090(20.38%)    | 1527810(6.92%)    | 132635(2.10%)    |

Supplementary Table 3: Definitions of the after-vaccination period and the corresponding period before or without vaccination in eligible individuals. Each comparison group included only individuals eligible to receive the vaccine brand and dose under consideration.

| Analysis | Post-vaccination                                      | No vaccination                                                                                                                     |                                                                                                                                                                      |
|----------|-------------------------------------------------------|------------------------------------------------------------------------------------------------------------------------------------|----------------------------------------------------------------------------------------------------------------------------------------------------------------------|
| Dose 1   | ChAdOx1                                               | Post first dose of ChAdOx1                                                                                                         | Unvaccinated or prior to the first dose of any vaccine                                                                                                               |
|          | BNT-162b2                                             | Post first dose of BNT-162b2                                                                                                       |                                                                                                                                                                      |
|          | mRNA-1273                                             | Post first dose of mRNA-1273                                                                                                       |                                                                                                                                                                      |
| Dose 2   | ChAdOx1                                               | Post second dose of ChAdOx1, following a first dose of ChAdOx1                                                                     | Between first dose of ChAdOx1 and second dose vaccination of any brand                                                                                               |
|          | BNT-162b2                                             | Post second dose of BNT-162b2, following a first dose of BNT-162b2                                                                 | Between first dose of BNT-162b2 and second dose vaccination of any brand                                                                                             |
|          | mRNA-1273                                             | Post second dose of mRNA-1273, following a first dose of mRNA-1273                                                                 | Between first dose of mRNA-1273 and second dose vaccination of any brand                                                                                             |
| Booster  | Any booster dose (vs. ChAdOx1 primary course)         | Post any mRNA booster vaccination (BNT-162b2 or mRNA-1273), following a primary course of ChAdOx1                                  | Between second dose of ChAdOx1 and booster dose vaccination, following a primary course of ChAdOx1                                                                   |
|          | Any booster dose (vs. BNT-162b2 primary course)       | Post any mRNA booster vaccination (BNT-162b2 or mRNA-1273), following a primary course of BNT-162b2                                | Between second dose of ChAdOx1 and booster dose vaccination, following a primary course of BNT-162b2                                                                 |
|          | Any booster dose (vs. mRNA primary course)            | Post any mRNA booster vaccination (BNT-162b2 or mRNA-1273), following a primary course of either BNT-162b2 or mRNA-1273            | Between second dose of ChAdOx1 and booster dose vaccination, following a primary course of either BNT-162b2 or mRNA-1273                                             |
|          | Any booster dose (vs. Any primary course)             | Post any mRNA booster vaccination (BNT-162b2 or mRNA-1273), following a primary course of one of BNT-162b2 or mRNA-1273 or ChAdOx1 | Between second dose of ChAdOx1 and booster dose vaccination, following a primary course of one of BNT-162b2 or mRNA-1273 or ChAdOx1                                  |
|          | BNT-162b2 booster dose (vs. ChAdOx1 primary course)   | Post BNT-162b2 booster vaccination, following a primary course of ChAdOx1                                                          | Between second dose of ChAdOx1 and booster dose vaccination, following a primary course of ChAdOx1                                                                   |
|          | BNT-162b2 booster dose (vs. BNT-162b2 primary course) | Post BNT-162b2 booster vaccination, following a primary course of BNT-162b2                                                        | Between second dose of BNT-162b2 and booster dose vaccination, following a primary course of BNT-162b2                                                               |
|          | BNT-162b2 booster dose (vs. mRNA primary course)      | Post BNT-162b2 booster vaccination, following a primary course of either BNT-162b2 or mRNA-1273                                    | Between second dose of either BNT-162b2 or mRNA-1273 and booster dose vaccination, following a primary course of either BNT-162b2 or mRNA-1273                       |
|          | BNT-162b2 booster dose (vs. Any primary course)       | Post BNT-162b2 booster vaccination, following a primary course of one of BNT-162b2 or mRNA-1273 or ChAdOx1                         | Between second dose of one of BNT-162b2 or mRNA-1273 or ChAdOx1 and booster dose vaccination, following a primary course of one of BNT-162b2 or mRNA-1273 or ChAdOx1 |
|          | mRNA-1273 booster dose (vs. ChAdOx1 primary course)   | Post mRNA-1273 booster vaccination, following a primary course of ChAdOx1                                                          | Between second dose of ChAdOx1 and booster dose vaccination, following a primary course of ChAdOx1                                                                   |
|          | mRNA-1273 booster dose (vs. BNT-162b2 primary course) | Post mRNA-1273 booster vaccination, following a primary course of BNT-162b2                                                        | Between second dose of BNT-162b2 and booster dose vaccination, following a primary course of BNT-162b2                                                               |
|          | mRNA-1273 booster dose (vs. mRNA primary course)      | Post mRNA-1273 booster vaccination, following a primary course of either BNT-162b2 or mRNA-1273                                    | Between second dose of either BNT-162b2 or mRNA-1273 and booster dose vaccination, following a primary course of either BNT-162b2 or mRNA-1273                       |
|          | mRNA-1273 booster dose (vs. Any primary course)       | Post mRNA-1273 booster vaccination, following a primary course of one of BNT-162b2 or mRNA-1273 or ChAdOx1                         | Between second dose of one of BNT-162b2 or mRNA-1273 or ChAdOx1 and booster dose vaccination, following a primary course of one of BNT-162b2 or mRNA-1273 or ChAdOx1 |

Supplementary Table 4: Number of events, person-years and incidence rates for individual arterial and venous thrombotic events, and other cardiovascular events, for first and second vaccinations<sup>6</sup>.

| Vaccination                 | Event                       | Events/100K person-years |                  | Incidence rate |                  |
|-----------------------------|-----------------------------|--------------------------|------------------|----------------|------------------|
|                             |                             | No vaccination           | After first dose | No vaccination | After first dose |
| <b>Dose 1</b>               |                             |                          |                  |                |                  |
| <b>ChAdOx1</b>              | AMI <sup>2</sup>            | 37915/205.00             | 37675/ 95.87     | 184.95         | 392.97           |
|                             | Ischaemic stroke            | 36720/205.00             | 35080/ 95.84     | 179.12         | 366.01           |
|                             | Pulmonary embolism          | 11835/205.00             | 9695/ 95.81      | 57.73          | 101.19           |
|                             | Lower limb DVT <sup>7</sup> | 9075/205.00              | 7590/95.78       | 44.27          | 79.24            |
|                             | ICVT <sup>8</sup>           | 370/205.00               | 290/96.28        | 1.80           | 3.01             |
|                             | Portal vein thrombosis      | 185/205.00               | 175/95.79        | 0.90           | 1.83             |
|                             | Any thrombocytopenia        | 1885/205.00              | 1760/95.98       | 9.20           | 18.34            |
|                             | SAH and HS <sup>9</sup>     | 5235/205.00              | 4790/95.88       | 25.54          | 49.96            |
|                             | Mesenteric thrombus         | 1515/205.00              | 1675/96.40       | 7.39           | 17.38            |
|                             | Myocarditis                 | 590/205.00               | 300/97.15        | 2.88           | 3.09             |
|                             | Pericarditis                | 455/205.00               | 315/96.08        | 2.22           | 3.28             |
|                             | Composite arterial          | 75655/205.00             | 73330/95.63      | 369.05         | 766.83           |
|                             | Composite venous            | 21230/205.00             | 17525/96.09      | 103.56         | 182.39           |
|                             | <b>BNT-162b2</b>            | AMI <sup>2</sup>         | 37915/205.00     | 28060/81.03    | 184.95           |
| Ischaemic stroke            |                             | 36720/205.00             | 28535/81.06      | 179.12         | 352.04           |
| Pulmonary embolism          |                             | 11835/205.00             | 6820/81.21       | 57.73          | 83.98            |
| Lower limb DVT <sup>7</sup> |                             | 9075/205.00              | 4895/81.37       | 44.27          | 60.16            |
| ICVT <sup>8</sup>           |                             | 370/205.00               | 160/80.53        | 1.80           | 1.99             |
| Portal vein thrombosis      |                             | 185/205.00               | 110/79.18        | 0.90           | 1.39             |
| Any thrombocytopenia        |                             | 1885/205.00              | 1215/81.20       | 9.20           | 14.96            |
| SAH and HS <sup>9</sup>     |                             | 5235/205.00              | 3575/81.60       | 25.54          | 43.81            |
| Mesenteric thrombus         |                             | 1515/205.00              | 1310/81.12       | 7.39           | 16.15            |
| Myocarditis                 |                             | 590/205.00               | 315/81.44        | 2.88           | 3.87             |
| Pericarditis                |                             | 455/205.00               | 270/78.92        | 2.22           | 3.42             |
| Composite arterial          |                             | 75655/205.00             | 57050/80.99      | 369.05         | 704.38           |
| Composite venous            |                             | 21230/205.00             | 11860/81.00      | 103.56         | 146.42           |
| <b>mRNA-1273</b>            |                             | AMI <sup>2</sup>         | 37915/205.00     | 145/5.20       | 184.95           |
|                             | Ischaemic stroke            | 36720/205.00             | 105/5.05         | 179.12         | 20.81            |
|                             | Pulmonary embolism          | 11835/205.00             | 90/5.04          | 57.73          | 17.86            |
|                             | Lower limb DVT <sup>7</sup> | 9075/205.00              | 95/5.15          | 44.27          | 18.43            |
|                             | ICVT <sup>8</sup>           | 370/205.00               | 10/5.09          | 1.80           | 1.97             |
|                             | Portal vein thrombosis      | 185/205.00               | 10/4.33          | 0.90           | 2.31             |
|                             | Any thrombocytopenia        | 1885/205.00              | 25/4.91          | 9.20           | 5.09             |
|                             | SAH and HS <sup>9</sup>     | 5235/205.00              | 30/5.15          | 25.54          | 5.82             |
|                             | Mesenteric thrombus         | 1515/205.00              | 10/5.03          | 7.39           | 1.99             |
|                             | Myocarditis                 | 590/205.00               | 50/4.91          | 2.88           | 10.19            |
|                             | Pericarditis                | 455/205.00               | 20/5.26          | 2.22           | 3.8              |
|                             | Composite arterial          | 75655/205.00             | 255/5.11         | 369.05         | 49.89            |
|                             | Composite venous            | 21230/205.00             | 190/5.10         | 103.56         | 37.25            |
|                             | <b>Doses 1 and 2</b>        |                          |                  |                |                  |
| <b>ChAdOx1</b>              | AMI <sup>2</sup>            | 19475/41.29              | 36210/93.48      | 471.69         | 387.35           |
|                             | Ischaemic stroke            | 19440/41.25              | 33805/93.53      | 471.26         | 361.44           |
|                             | Pulmonary embolism          | 4785/41.26               | 9000/93.63       | 115.98         | 96.12            |
|                             | Lower limb DVT <sup>7</sup> | 3730/41.28               | 6975/93.64       | 90.35          | 74.49            |
|                             | ICVT <sup>8</sup>           | 190/41.29                | 170/93.60        | 4.6            | 1.82             |
|                             | Portal vein thrombosis      | 85/41.48                 | 145/93.49        | 2.05           | 1.55             |
|                             | Any thrombocytopenia        | 1130/41.16               | 1400/93.77       | 27.45          | 14.93            |
|                             | SAH and HS <sup>9</sup>     | 2385/41.31               | 4360/93.64       | 57.74          | 46.56            |
|                             | Mesenteric thrombus         | 765/41.24                | 1555/93.64       | 18.55          | 16.61            |
|                             | Myocarditis                 | 145/41.23                | 285/93.75        | 3.52           | 3.04             |
|                             | Pericarditis                | 160/41.70                | 280/93.36        | 3.84           | 3                |
|                             | Composite arterial          | 39425/41.23              | 70485/93.36      | 956.17         | 755.01           |
|                             | Composite venous            | 8685/41.27               | 16120/93.60      | 210.46         | 172.22           |
|                             | <b>BNT-162b2</b>            | AMI <sup>2</sup>         | 13125/33.65      | 27295/72.57    | 390              |
| Ischaemic stroke            |                             | 13575/33.62              | 27930/72.61      | 403.81         | 384.67           |
| Pulmonary embolism          |                             | 3070/33.64               | 6545/72.75       | 91.26          | 89.96            |
| Lower limb DVT <sup>7</sup> |                             | 2115/33.62               | 4725/72.64       | 62.9           | 65.04            |
| ICVT <sup>8</sup>           |                             | 70/33.60                 | 145/73.05        | 2.08           | 1.98             |
| Portal vein thrombosis      |                             | 50/33.67                 | 105/72.40        | 1.48           | 1.45             |
| Any thrombocytopenia        |                             | 675/33.70                | 1125/72.62       | 20.03          | 15.49            |
| SAH and HS <sup>9</sup>     |                             | 1515/33.67               | 3440/72.72       | 45             | 47.31            |
| Mesenteric thrombus         |                             | 565/33.70                | 1225/72.67       | 16.76          | 16.86            |
| Myocarditis                 |                             | 120/33.82                | 280/72.58        | 3.55           | 3.86             |
| Pericarditis                |                             | 100/33.54                | 255/72.52        | 2.98           | 3.52             |
| Composite arterial          |                             | 26975/33.63              | 55620/72.44      | 802.22         | 767.8            |
| Composite venous            |                             | 5260/33.67               | 11400/72.69      | 156.22         | 156.83           |
| <b>mRNA-1273</b>            |                             | AMI <sup>2</sup>         | 85/2.17          | 110/4.02       | 39.17            |
|                             | Ischaemic stroke            | 70/2.16                  | 90/4.06          | 32.39          | 22.14            |
|                             | Pulmonary embolism          | 40/2.15                  | 70/4.09          | 18.6           | 17.1             |
|                             | Lower limb DVT <sup>7</sup> | 50/2.17                  | 60/4.03          | 23.04          | 14.88            |
|                             | ICVT <sup>8</sup>           | 10/2.20                  | 10/4.01          | 4.54           | 2.5              |
|                             | Portal vein thrombosis      | 10/2.25                  | 10/4.05          | 4.44           | 2.47             |
|                             | Any thrombocytopenia        | 20/2.17                  | 15/4.11          | 9.21           | 3.65             |
|                             | SAH and HS <sup>9</sup>     | 10/2.29                  | 25/3.99          | 4.37           | 6.27             |
|                             | Mesenteric thrombus         | 10/2.22                  | 10/4.19          | 4.51           | 2.39             |
|                             | Myocarditis                 | 15/2.13                  | 45/4.07          | 7.04           | 11.05            |
|                             | Pericarditis                | 10/2.19                  | 15/4.07          | 4.57           | 3.68             |
|                             | Composite arterial          | 160/2.17                 | 200/4.06         | 73.66          | 49.24            |
|                             | Composite venous            | 90/2.18                  | 135/4.06         | 41.37          | 33.29            |

<sup>6</sup> Bold formatting identifies headers within the table, specifically at each vaccination dose, to clearly delineate comparison groups.

Supplementary Table 5: Number of events, person-years and incidence rates for individual arterial and venous thrombotic events, and other cardiovascular events, for booster vaccination with BNT-162b2.

| Vaccination                | Event                       | Events/100K person-years |                           | Incidence rate      |                           |
|----------------------------|-----------------------------|--------------------------|---------------------------|---------------------|---------------------------|
|                            |                             | Primary course only      | After booster vaccination | Primary course only | After booster vaccination |
| <b>Primary course</b>      |                             |                          |                           |                     |                           |
| <b>Any</b>                 | AMI <sup>2</sup>            | 77890/182.46             | 19640/ 38.88              | 426.9               | 505.18                    |
|                            | Ischaemic stroke            | 78120/182.46             | 20050/ 38.92              | 428.16              | 515.15                    |
|                            | Pulmonary embolism          | 18580/182.66             | 4710/ 39.05               | 101.72              | 120.61                    |
|                            | Lower limb DVT <sup>7</sup> | 13605/182.59             | 3105/ 39.05               | 74.51               | 79.51                     |
|                            | ICVT <sup>8</sup>           | 360/182.19               | 65/ 38.47                 | 1.98                | 1.69                      |
|                            | Portal vein thrombosis      | 300/183.01               | 50/39.51                  | 1.64                | 1.27                      |
|                            | Any thrombocytopenia        | 3340/182.60              | 680/ 39.10                | 18.29               | 17.39                     |
|                            | SAH and HS <sup>9</sup>     | 9110/182.67              | 2455/ 38.97               | 49.87               | 62.99                     |
|                            | Mesenteric thrombus         | 3300/182.62              | 845/ 39.49                | 18.07               | 21.4                      |
|                            | Myocarditis                 | 675/182.54               | 120/ 39.15                | 3.7                 | 3.06                      |
|                            | Pericarditis                | 615/182.84               | 110/ 39.39                | 3.36                | 2.79                      |
|                            | Composite arterial          | 157235/182.21            | 39735/ 38.72              | 862.93              | 1026.14                   |
|                            | Composite venous            | 32545/182.54             | 7855/ 38.97               | 178.29              | 201.54                    |
| <b>BNT-162b2/mRNA-1273</b> | AMI <sup>2</sup>            | 33945/80.40              | 10435/19.11               | 422.22              | 546                       |
|                            | Ischaemic stroke            | 35745/80.39              | 10985/19.11               | 444.63              | 574.85                    |
|                            | Pulmonary embolism          | 8010/80.43               | 2410/19.13                | 99.58               | 125.97                    |
|                            | Lower limb DVT <sup>7</sup> | 5660/80.46               | 1550/19.23                | 70.34               | 80.59                     |
|                            | ICVT <sup>8</sup>           | 165/80.98                | 35/19.70                  | 2.04                | 1.78                      |
|                            | Portal vein thrombosis      | 125/80.42                | 20/19.27                  | 1.55                | 1.04                      |
|                            | Any thrombocytopenia        | 1535/80.42               | 340/19.18                 | 19.09               | 17.72                     |
|                            | SAH and HS <sup>9</sup>     | 4115/80.43               | 1370/19.14                | 51.16               | 71.58                     |
|                            | Mesenteric thrombus         | 1505/80.57               | 485/19.22                 | 18.68               | 25.23                     |
|                            | Myocarditis                 | 345/80.19                | 60/19.17                  | 4.3                 | 3.13                      |
|                            | Pericarditis                | 295/80.22                | 55/19.26                  | 3.68                | 2.86                      |
|                            | Composite arterial          | 70215/80.31              | 21425/19.04               | 874.28              | 1125.34                   |
|                            | Composite venous            | 13830/80.45              | 3975/19.15                | 171.91              | 207.62                    |
| <b>ChAdOx1</b>             | AMI <sup>2</sup>            | 43945/102.06             | 9200/ 19.79               | 430.59              | 464.92                    |
|                            | Ischaemic stroke            | 42375/102.05             | 9065/ 19.78               | 415.23              | 458.31                    |
|                            | Pulmonary embolism          | 10570/102.23             | 2300/ 19.81               | 103.4               | 116.08                    |
|                            | Lower limb DVT <sup>7</sup> | 7945/102.12              | 1555/ 19.82               | 77.8                | 78.44                     |
|                            | ICVT <sup>8</sup>           | 195/101.89               | 30/ 19.53                 | 1.91                | 1.54                      |
|                            | Portal vein thrombosis      | 175/102.33               | 30/ 19.48                 | 1.71                | 1.54                      |
|                            | Any thrombocytopenia        | 1800/102.15              | 340/ 19.81                | 17.62               | 17.16                     |
|                            | SAH and HS <sup>9</sup>     | 4990/102.14              | 1085/ 19.83               | 48.85               | 54.71                     |
|                            | Mesenteric thrombus         | 1795/102.18              | 360/ 19.82                | 17.57               | 18.16                     |
|                            | Myocarditis                 | 330/102.26               | 60/ 20.15                 | 3.23                | 2.98                      |
|                            | Pericarditis                | 320/102.42               | 55/ 19.94                 | 3.12                | 2.76                      |
|                            | Composite arterial          | 87020/101.93             | 18310/ 19.76              | 853.73              | 926.59                    |
|                            | Composite venous            | 18715/102.13             | 3880/ 19.81               | 183.25              | 195.83                    |
| <b>BNT-162b2</b>           | AMI <sup>2</sup>            | 33835/76.71              | 10430/18.87               | 441.1               | 552.7                     |
|                            | Ischaemic stroke            | 35650/76.69              | 10980/18.83               | 464.85              | 583.27                    |
|                            | Pulmonary embolism          | 7945/76.84               | 2405/18.92                | 103.39              | 127.08                    |
|                            | Lower limb DVT <sup>7</sup> | 5600/76.76               | 1545/18.91                | 72.96               | 81.7                      |
|                            | ICVT <sup>8</sup>           | 160/76.41                | 35/18.65                  | 2.09                | 1.88                      |
|                            | Portal vein thrombosis      | 120/76.40                | 20/18.89                  | 1.57                | 1.06                      |
|                            | Any thrombocytopenia        | 1520/76.94               | 340/18.95                 | 19.75               | 17.94                     |
|                            | SAH and HS <sup>9</sup>     | 4090/76.62               | 1365/18.89                | 53.38               | 72.27                     |
|                            | Mesenteric thrombus         | 1505/76.80               | 485/19.09                 | 19.6                | 25.41                     |
|                            | Myocarditis                 | 300/77.04                | 60/19.10                  | 3.89                | 3.14                      |
|                            | Pericarditis                | 280/76.49                | 55/18.67                  | 3.66                | 2.95                      |
|                            | Composite arterial          | 70005/76.60              | 21415/18.78               | 913.88              | 1140.44                   |
|                            | Composite venous            | 13700/76.75              | 3965/18.91                | 178.51              | 209.65                    |

<sup>7</sup> Deep venous thrombosis

<sup>8</sup> Intracranial venous thrombosis

<sup>9</sup> Subarachnoid haemorrhage and haemorrhagic stroke

Supplementary Table 6: Number of events, person-years and incidence rates for individual arterial and venous thrombotic events, and other cardiovascular events, for booster vaccination with mRNA-1273.

| Vaccination                | Event                       | Events/100K person-years |                           | Incidence rate      |                           |
|----------------------------|-----------------------------|--------------------------|---------------------------|---------------------|---------------------------|
|                            |                             | Primary course only      | After booster vaccination | Primary course only | After booster vaccination |
| <b>Primary course</b>      |                             |                          |                           |                     |                           |
| <b>Any</b>                 | AMI <sup>2</sup>            | 77890/182.41             | 1830/7.47                 | 427.01              | 244.92                    |
|                            | Ischaemic stroke            | 78120/182.41             | 1345/7.46                 | 428.26              | 180.32                    |
|                            | Pulmonary embolism          | 18580/182.60             | 430/7.47                  | 101.75              | 57.55                     |
|                            | Lower limb DVT <sup>7</sup> | 13605/182.66             | 320/7.51                  | 74.48               | 42.59                     |
|                            | ICVT <sup>8</sup>           | 360/183.47               | 10/7.01                   | 1.96                | 1.43                      |
|                            | Portal vein thrombosis      | 300/183.23               | 10/7.50                   | 1.64                | 1.33                      |
|                            | Any thrombocytopenia        | 3340/182.65              | 50/7.41                   | 18.29               | 6.75                      |
|                            | SAH and HS <sup>9</sup>     | 9110/182.86              | 150/7.42                  | 49.82               | 20.21                     |
|                            | Mesenteric thrombus         | 3300/182.68              | 55/7.48                   | 18.06               | 7.35                      |
|                            | Myocarditis                 | 675/182.13               | 20/7.35                   | 3.71                | 2.72                      |
|                            | Pericarditis                | 615/182.71               | 10/7.51                   | 3.37                | 1.33                      |
|                            | Composite arterial          | 157235/182.22            | 3200/7.46                 | 862.88              | 429.07                    |
|                            | Composite venous            | 32545/182.56             | 760/7.47                  | 178.27              | 101.79                    |
| <b>BNT-162b2/mRNA-1273</b> | AMI <sup>2</sup>            | 33945/80.39              | 475/ 2.25                 | 422.25              | 210.88                    |
|                            | Ischaemic stroke            | 35745/80.45              | 385/ 2.22                 | 444.29              | 173.12                    |
|                            | Pulmonary embolism          | 8010/80.47               | 115/ 2.27                 | 99.54               | 50.64                     |
|                            | Lower limb DVT <sup>7</sup> | 5660/80.38               | 70/ 2.24                  | 70.42               | 31.28                     |
|                            | ICVT <sup>8</sup>           | 165/80.45                | 10/ 2.23                  | 2.05                | 4.48                      |
|                            | Portal vein thrombosis      | 125/79.95                | 10/ 2.26                  | 1.56                | 4.43                      |
|                            | Any thrombocytopenia        | 1535/80.60               | 15/ 2.22                  | 19.04               | 6.77                      |
|                            | SAH and HS <sup>9</sup>     | 4115/80.55               | 40/ 2.23                  | 51.09               | 17.94                     |
|                            | Mesenteric thrombus         | 1505/80.45               | 20/ 2.24                  | 18.71               | 8.92                      |
|                            | Myocarditis                 | 345/80.61                | 10/ 2.20                  | 4.28                | 4.54                      |
|                            | Pericarditis                | 295/80.23                | 10/ 2.28                  | 3.68                | 4.39                      |
|                            | Composite arterial          | 70215/80.29              | 870/ 2.23                 | 874.52              | 389.78                    |
|                            | Composite venous            | 13830/80.45              | 185/ 2.24                 | 171.91              | 82.76                     |
| <b>ChAdOx1</b>             | AMI <sup>2</sup>            | 43945/102.03             | 1355/5.23                 | 430.71              | 258.97                    |
|                            | Ischaemic stroke            | 42375/102.03             | 960/5.24                  | 415.31              | 183.38                    |
|                            | Pulmonary embolism          | 10570/102.13             | 310/5.21                  | 103.49              | 59.49                     |
|                            | Lower limb DVT <sup>7</sup> | 7945/102.13              | 250/5.22                  | 77.79               | 47.86                     |
|                            | ICVT <sup>8</sup>           | 195/101.99               | 10/5.23                   | 1.91                | 1.91                      |
|                            | Portal vein thrombosis      | 175/102.06               | 10/5.31                   | 1.71                | 1.88                      |
|                            | Any thrombocytopenia        | 1800/102.04              | 35/5.16                   | 17.64               | 6.78                      |
|                            | SAH and HS <sup>9</sup>     | 4990/102.24              | 110/5.19                  | 48.81               | 21.18                     |
|                            | Mesenteric thrombus         | 1795/102.21              | 35/5.23                   | 17.56               | 6.69                      |
|                            | Myocarditis                 | 330/102.45               | 15/5.11                   | 3.22                | 2.93                      |
|                            | Pericarditis                | 320/102.16               | 10/5.24                   | 3.13                | 1.91                      |
|                            | Composite arterial          | 87020/101.95             | 2325/5.21                 | 853.59              | 446.61                    |
|                            | Composite venous            | 18715/102.12             | 575/5.24                  | 183.27              | 109.82                    |
| <b>BNT-162b2</b>           | AMI <sup>2</sup>            | 33835/76.67              | 470/ 2.02                 | 441.28              | 233.01                    |
|                            | Ischaemic stroke            | 35650/76.71              | 380/ 2.02                 | 464.71              | 188.46                    |
|                            | Pulmonary embolism          | 7945/76.75               | 110/ 2.03                 | 103.52              | 54.2                      |
|                            | Lower limb DVT <sup>7</sup> | 5600/76.69               | 65/ 2.03                  | 73.03               | 31.96                     |
|                            | ICVT <sup>8</sup>           | 160/77.25                | 10/ 1.95                  | 2.07                | 5.13                      |
|                            | Portal vein thrombosis      | 120/77.51                | 10/ 1.91                  | 1.55                | 5.23                      |
|                            | Any thrombocytopenia        | 1520/76.91               | 15/ 2.02                  | 19.76               | 7.44                      |
|                            | SAH and HS <sup>9</sup>     | 4090/76.69               | 40/ 2.01                  | 53.33               | 19.91                     |
|                            | Mesenteric thrombus         | 1505/76.69               | 20/ 2.05                  | 19.62               | 9.77                      |
|                            | Myocarditis                 | 300/76.49                | 10/ 1.96                  | 3.92                | 5.1                       |
|                            | Pericarditis                | 280/76.54                | 10/ 1.91                  | 3.66                | 5.23                      |
|                            | Composite arterial          | 70005/76.59              | 860/ 2.02                 | 914                 | 426.6                     |
|                            | Composite venous            | 13700/76.80              | 180/2.04                  | 178.38              | 88.15                     |

Supplementary Table 7: Number of events, person-years and incidence rates for individual arterial and venous thrombotic events, and other cardiovascular events, for booster vaccination with BNT-162b2/ mRNA-1273.

| Vaccination                 | Event                       | Events/100K person-years |                           | Incidence rate      |                           |
|-----------------------------|-----------------------------|--------------------------|---------------------------|---------------------|---------------------------|
|                             |                             | Primary course only      | After booster vaccination | Primary course only | After booster vaccination |
| <b>Primary course</b>       |                             |                          |                           |                     |                           |
| <b>Any</b>                  | AMI <sup>2</sup>            | 77890/182.46             | 21470/ 46.36              | 426.89              | 463.11                    |
|                             | Ischaemic stroke            | 78120/182.43             | 21400/ 46.34              | 428.21              | 461.82                    |
|                             | Pulmonary embolism          | 18580/182.75             | 5135/ 46.51               | 101.67              | 101.41                    |
|                             | Lower limb DVT <sup>7</sup> | 13605/182.56             | 3425/ 46.43               | 74.52               | 73.77                     |
|                             | ICVT <sup>8</sup>           | 360/182.76               | 75/ 46.59                 | 1.97                | 1.61                      |
|                             | Portal vein thrombosis      | 300/183.14               | 60/ 46.34                 | 1.64                | 1.29                      |
|                             | Any thrombocytopenia        | 3340/182.74              | 735/ 46.32                | 18.28               | 15.87                     |
|                             | SAH and HS <sup>9</sup>     | 9110/182.47              | 2605/ 46.48               | 49.93               | 56.04                     |
|                             | Mesenteric thrombus         | 3300/182.58              | 900/ 46.49                | 18.07               | 19.36                     |
|                             | Myocarditis                 | 675/182.65               | 145/ 46.56                | 3.7                 | 3.11                      |
|                             | Pericarditis                | 615/182.49               | 125/ 46.32                | 3.37                | 2.7                       |
|                             | Composite arterial          | 157235/182.21            | 42935/ 46.20              | 862.93              | 929.36                    |
|                             | Composite venous            | 32545/182.58             | 8615/ 46.37               | 178.25              | 185.79                    |
|                             | <b>BNT-162b2/mRNA-1273</b>  | AMI <sup>2</sup>         | 33945/80.41               | 10915/21.37         | 422.15                    |
| Ischaemic stroke            |                             | 35745/80.43              | 11370/21.33               | 444.45              | 532.94                    |
| Pulmonary embolism          |                             | 8010/80.55               | 2525/21.45                | 99.45               | 117.73                    |
| Lower limb DVT <sup>7</sup> |                             | 5660/80.52               | 1615/21.38                | 70.29               | 75.56                     |
| ICVT <sup>8</sup>           |                             | 165/80.54                | 40/21.93                  | 2.05                | 1.82                      |
| Portal vein thrombosis      |                             | 125/80.52                | 25/21.40                  | 1.55                | 1.17                      |
| Any thrombocytopenia        |                             | 1535/80.59               | 355/21.31                 | 19.05               | 16.66                     |
| SAH and HS <sup>9</sup>     |                             | 4115/80.56               | 1405/21.44                | 51.08               | 65.53                     |
| Mesenteric thrombus         |                             | 1505/80.60               | 505/21.54                 | 18.67               | 23.44                     |
| Myocarditis                 |                             | 345/80.88                | 70/21.78                  | 4.27                | 3.21                      |
| Pericarditis                |                             | 295/80.13                | 60/21.37                  | 3.68                | 2.81                      |
| Composite arterial          |                             | 70215/80.27              | 22300/21.25               | 874.73              | 1049.33                   |
| Composite venous            |                             | 13830/80.46              | 4165/21.39                | 171.88              | 194.72                    |
| <b>ChAdOx1</b>              |                             | AMI <sup>2</sup>         | 43945/102.06              | 10555/ 25.01        | 430.57                    |
|                             | Ischaemic stroke            | 42375/102.08             | 10030/ 25.00              | 415.12              | 401.21                    |
|                             | Pulmonary embolism          | 10570/102.15             | 2610/ 25.09               | 103.47              | 104.01                    |
|                             | Lower limb DVT <sup>7</sup> | 7945/102.09              | 1805/ 25.07               | 77.82               | 71.99                     |
|                             | ICVT <sup>8</sup>           | 195/102.22               | 40/ 25.37                 | 1.91                | 1.58                      |
|                             | Portal vein thrombosis      | 175/102.11               | 35/ 25.80                 | 1.71                | 1.36                      |
|                             | Any thrombocytopenia        | 1800/102.22              | 380/ 25.10                | 17.61               | 15.14                     |
|                             | SAH and HS <sup>9</sup>     | 4990/102.17              | 1195/ 25.15               | 48.84               | 47.51                     |
|                             | Mesenteric thrombus         | 1795/102.08              | 395/ 25.10                | 17.58               | 15.74                     |
|                             | Myocarditis                 | 330/102.35               | 75/ 25.11                 | 3.22                | 2.99                      |
|                             | Pericarditis                | 320/102.15               | 65/ 25.06                 | 3.13                | 2.59                      |
|                             | Composite arterial          | 87020/101.95             | 20635/ 24.94              | 853.54              | 827.32                    |
|                             | Composite venous            | 18715/102.08             | 4455/ 25.08               | 183.33              | 177.61                    |
|                             | <b>BNT-162b2</b>            | AMI <sup>2</sup>         | 33835/76.69               | 10900/20.86         | 441.19                    |
| Ischaemic stroke            |                             | 35650/76.64              | 11360/20.88               | 465.17              | 544.02                    |
| Pulmonary embolism          |                             | 7945/76.83               | 2515/20.93                | 103.4               | 120.15                    |
| Lower limb DVT <sup>7</sup> |                             | 5600/76.68               | 1610/20.80                | 73.03               | 77.41                     |
| ICVT <sup>8</sup>           |                             | 160/76.07                | 40/20.92                  | 2.1                 | 1.91                      |
| Portal vein thrombosis      |                             | 120/76.52                | 25/21.39                  | 1.57                | 1.17                      |
| Any thrombocytopenia        |                             | 1520/76.61               | 355/20.93                 | 19.84               | 16.96                     |
| SAH and HS <sup>9</sup>     |                             | 4090/76.70               | 1405/20.90                | 53.32               | 67.24                     |
| Mesenteric thrombus         |                             | 1505/76.67               | 505/20.89                 | 19.63               | 24.18                     |
| Myocarditis                 |                             | 300/76.28                | 65/21.07                  | 3.93                | 3.09                      |
| Pericarditis                |                             | 280/76.51                | 60/20.81                  | 3.66                | 2.88                      |
| Composite arterial          |                             | 70005/76.59              | 22275/20.79               | 913.99              | 1071.28                   |
| Composite venous            |                             | 13700/76.73              | 4145/20.96                | 178.54              | 197.8                     |



Supplementary Table 8: Hazard ratios and 95% CIs for individual arterial and venous thrombotic events, and other cardiovascular events, by time since first dose vaccination with ChAdOx1.

| Outcome         | Age and Sex adjusted HR (95% CI) |                  |                  |                  |                  |                  | Fully Adjusted HR (95% CI) |                  |                  |                  |                  |                  |                  |
|-----------------|----------------------------------|------------------|------------------|------------------|------------------|------------------|----------------------------|------------------|------------------|------------------|------------------|------------------|------------------|
|                 | Week 1                           | Week 2           | Weeks 3-4        | Weeks 5-12       | Weeks 13-24      | Weeks 25-26      | Week 1                     | Week 2           | Weeks 3-4        | Weeks 5-12       | Weeks 13-24      | Weeks 25-26      |                  |
| <b>Arterial</b> | Composite arterial               | 0.90 (0.87,0.94) | 1.06 (1.02,1.10) | 1.09 (1.06,1.12) | 1.17 (1.15,1.19) | 1.26 (1.23,1.29) | 1.32 (1.28,1.37)           | 0.84 (0.80,0.87) | 0.97 (0.93,1.01) | 0.97 (0.94,1.00) | 1.00 (0.97,1.02) | 0.99 (0.97,1.02) | 0.98 (0.95,1.02) |
|                 | AMI <sup>2</sup>                 | 0.94 (0.89,0.99) | 1.03 (0.98,1.09) | 1.11 (1.06,1.16) | 1.22 (1.18,1.25) | 1.31 (1.27,1.35) | 1.41 (1.34,1.48)           | 0.87 (0.82,0.92) | 0.95 (0.89,1.00) | 0.99 (0.95,1.04) | 1.03 (1.00,1.06) | 1.02 (0.98,1.05) | 1.02 (0.97,1.08) |
|                 | Ischaemic stroke                 | 0.88 (0.83,0.93) | 1.06 (1.00,1.12) | 1.06 (1.01,1.10) | 1.12 (1.09,1.16) | 1.22 (1.18,1.27) | 1.27 (1.20,1.34)           | 0.82 (0.77,0.87) | 0.97 (0.92,1.03) | 0.95 (0.91,0.99) | 0.97 (0.93,1.00) | 0.99 (0.95,1.03) | 0.97 (0.91,1.03) |
| <b>Venous</b>   | Composite venous                 | 0.87 (0.80,0.94) | 1.11 (1.03,1.20) | 1.09 (1.03,1.15) | 1.06 (1.02,1.10) | 1.13 (1.09,1.18) | 1.05 (0.98,1.13)           | 0.80 (0.74,0.87) | 1.02 (0.94,1.09) | 0.98 (0.93,1.04) | 0.92 (0.88,0.96) | 0.94 (0.90,0.98) | 0.84 (0.78,0.90) |
|                 | Lower limb DVT <sup>7</sup>      | 0.89 (0.78,1.01) | 1.09 (0.97,1.23) | 1.14 (1.05,1.25) | 1.10 (1.03,1.16) | 1.11 (1.05,1.18) | 1.00 (0.90,1.11)           | 0.82 (0.72,0.94) | 1.00 (0.89,1.13) | 1.04 (0.95,1.13) | 0.96 (0.90,1.02) | 0.93 (0.87,0.99) | 0.81 (0.73,0.90) |
|                 | Pulmonary embolism               | 0.84 (0.76,0.93) | 1.03 (0.93,1.13) | 1.02 (0.94,1.10) | 1.03 (0.98,1.09) | 1.16 (1.09,1.22) | 1.10 (1.00,1.21)           | 0.78 (0.70,0.86) | 0.94 (0.85,1.03) | 0.91 (0.85,0.99) | 0.90 (0.85,0.95) | 0.97 (0.91,1.02) | 0.88 (0.80,0.97) |
|                 | ICVT <sup>8</sup>                | 1.39 (0.70,2.76) | 6.08 (4.21,8.79) | 4.09 (2.96,5.66) | 1.37 (1.00,1.87) | 1.49 (1.06,2.09) | 1.72 (0.94,3.14)           | 1.37 (0.69,2.72) | 5.92 (4.07,8.63) | 3.91 (2.81,5.44) | 1.25 (0.91,1.73) | 1.34 (0.95,1.90) | 1.60 (0.88,2.91) |
|                 | Mesenteric thrombus              | 0.64 (0.46,0.87) | 1.09 (0.84,1.40) | 1.07 (0.87,1.31) | 1.15 (0.99,1.33) | 1.38 (1.18,1.62) | 1.54 (1.21,1.97)           | 0.56 (0.41,0.78) | 0.94 (0.72,1.22) | 0.91 (0.74,1.12) | 0.90 (0.77,1.06) | 0.98 (0.83,1.17) | 0.99 (0.77,1.29) |
|                 | Portal vein thrombosis           | 0.86 (0.34,2.17) | 1.16 (0.52,2.57) | 1.06 (0.57,1.97) | 1.21 (0.82,1.79) | 1.51 (0.98,2.33) | 1.96 (0.96,4.02)           | 0.61 (0.23,1.61) | 0.80 (0.35,1.84) | 0.70 (0.35,1.39) | 0.78 (0.49,1.24) | 0.76 (0.46,1.26) | 0.88 (0.39,2.01) |
| <b>Other</b>    | Any thrombocytopenia             | 1.45 (1.12,1.88) | 2.53 (2.05,3.12) | 2.00 (1.67,2.39) | 1.79 (1.57,2.04) | 2.16 (1.86,2.52) | 1.98 (1.52,2.58)           | 1.22 (0.94,1.58) | 2.07 (1.67,2.58) | 1.60 (1.33,1.93) | 1.24 (1.08,1.43) | 1.28 (1.10,1.49) | 1.04 (0.80,1.36) |
|                 | SAH and HS <sup>9</sup>          | 0.91 (0.78,1.06) | 0.99 (0.86,1.16) | 0.99 (0.89,1.11) | 1.06 (0.98,1.15) | 1.11 (1.02,1.20) | 1.02 (0.89,1.18)           | 0.89 (0.76,1.04) | 0.97 (0.83,1.13) | 0.97 (0.86,1.09) | 1.02 (0.94,1.10) | 1.04 (0.95,1.13) | 0.94 (0.81,1.08) |
|                 | Myocarditis                      | 1.77 (1.06,2.96) | 0.61 (0.27,1.37) | 1.36 (0.90,2.05) | 1.01 (0.77,1.34) | 1.12 (0.87,1.45) | 1.22 (0.77,1.95)           | 1.63 (0.98,2.72) | 0.56 (0.25,1.26) | 1.26 (0.84,1.90) | 0.93 (0.70,1.22) | 0.99 (0.77,1.28) | 1.04 (0.66,1.65) |
|                 | Pericarditis                     | 0.99 (0.50,1.96) | 1.85 (1.11,3.09) | 1.50 (0.98,2.30) | 1.53 (1.18,1.98) | 1.14 (0.88,1.49) | 1.17 (0.71,1.94)           | 0.94 (0.48,1.86) | 1.74 (1.04,2.91) | 1.37 (0.89,2.11) | 1.37 (1.05,1.78) | 0.96 (0.73,1.26) | 0.97 (0.60,1.59) |

Supplementary Table 9: Hazard ratios and 95% CIs for individual arterial and venous thrombotic events, and other cardiovascular events, by time since first dose vaccination with BNT-162b2.

| Outcome         | Age and Sex adjusted HR (95% CI) |                  |                  |                  |                  |                  | Fully Adjusted HR (95% CI) |                  |                  |                  |                  |                  |                  |
|-----------------|----------------------------------|------------------|------------------|------------------|------------------|------------------|----------------------------|------------------|------------------|------------------|------------------|------------------|------------------|
|                 | Week 1                           | Week 2           | Weeks 3-4        | Weeks 5-12       | Weeks 13-24      | Weeks 25-26      | Week 1                     | Week 2           | Weeks 3-4        | Weeks 5-12       | Weeks 13-24      | Weeks 25-26      |                  |
| <b>Arterial</b> | Composite arterial               | 0.80 (0.76,0.84) | 0.90 (0.86,0.95) | 0.96 (0.93,0.99) | 1.04 (1.01,1.06) | 1.13 (1.10,1.15) | 1.13 (1.09,1.18)           | 0.73 (0.69,0.76) | 0.80 (0.77,0.84) | 0.83 (0.80,0.86) | 0.85 (0.83,0.87) | 0.90 (0.88,0.93) | 0.91 (0.87,0.94) |
|                 | AMI <sup>2</sup>                 | 0.88 (0.83,0.94) | 1.00 (0.94,1.06) | 1.01 (0.96,1.06) | 1.12 (1.09,1.16) | 1.22 (1.18,1.26) | 1.25 (1.18,1.31)           | 0.76 (0.71,0.82) | 0.85 (0.79,0.90) | 0.83 (0.79,0.87) | 0.88 (0.85,0.91) | 0.93 (0.89,0.96) | 0.95 (0.89,1.00) |
|                 | Ischaemic stroke                 | 0.73 (0.68,0.77) | 0.83 (0.78,0.88) | 0.90 (0.86,0.95) | 0.95 (0.92,0.98) | 1.04 (1.01,1.08) | 1.04 (0.98,1.10)           | 0.69 (0.65,0.74) | 0.78 (0.74,0.84) | 0.84 (0.80,0.88) | 0.85 (0.82,0.88) | 0.92 (0.88,0.96) | 0.91 (0.86,0.97) |
| <b>Venous</b>   | Composite venous                 | 0.72 (0.65,0.79) | 0.86 (0.78,0.94) | 0.83 (0.78,0.89) | 0.89 (0.86,0.93) | 0.97 (0.93,1.01) | 0.90 (0.84,0.98)           | 0.66 (0.60,0.73) | 0.79 (0.72,0.87) | 0.75 (0.70,0.81) | 0.79 (0.76,0.82) | 0.85 (0.81,0.88) | 0.78 (0.72,0.84) |
|                 | Lower limb DVT <sup>7</sup>      | 0.75 (0.64,0.87) | 0.91 (0.78,1.05) | 0.81 (0.72,0.90) | 0.89 (0.84,0.95) | 0.92 (0.87,0.98) | 0.88 (0.78,0.99)           | 0.71 (0.60,0.83) | 0.85 (0.73,0.98) | 0.75 (0.67,0.84) | 0.80 (0.75,0.86) | 0.82 (0.77,0.87) | 0.78 (0.69,0.88) |
|                 | Pulmonary embolism               | 0.68 (0.60,0.78) | 0.80 (0.71,0.90) | 0.82 (0.75,0.90) | 0.88 (0.83,0.93) | 1.01 (0.95,1.06) | 0.93 (0.83,1.03)           | 0.63 (0.55,0.72) | 0.73 (0.65,0.83) | 0.74 (0.68,0.81) | 0.77 (0.73,0.82) | 0.87 (0.82,0.93) | 0.80 (0.72,0.89) |
|                 | ICVT <sup>8</sup>                | 0.17 (0.02,1.22) | 1.91 (1.03,3.54) | 1.21 (0.69,2.11) | 0.90 (0.63,1.28) | 1.29 (0.96,1.73) | 1.15 (0.60,2.20)           | 0.16 (0.02,1.14) | 1.68 (0.89,3.14) | 1.07 (0.61,1.89) | 0.79 (0.55,1.14) | 1.12 (0.82,1.53) | 1.02 (0.53,1.99) |
|                 | Mesenteric thrombus              | 0.62 (0.45,0.88) | 0.79 (0.59,1.07) | 0.82 (0.65,1.03) | 1.00 (0.86,1.16) | 1.22 (1.04,1.43) | 1.11 (0.85,1.45)           | 0.55 (0.39,0.77) | 0.69 (0.51,0.94) | 0.67 (0.53,0.84) | 0.75 (0.64,0.89) | 0.87 (0.72,1.03) | 0.76 (0.57,1.00) |
|                 | Portal vein thrombosis           | 0.89 (0.28,2.85) | 0.52 (0.13,2.15) | 0.82 (0.35,1.92) | 1.41 (0.94,2.11) | 1.55 (1.04,2.32) | 0.61 (0.21,1.74)           | 0.60 (0.17,2.15) | 0.39 (0.09,1.71) | 0.59 (0.22,1.55) | 1.05 (0.64,1.71) | 1.17 (0.71,1.93) | 0.45 (0.13,1.50) |
| <b>Other</b>    | Any thrombocytopenia             | 1.61 (1.24,2.08) | 0.96 (0.69,1.36) | 1.47 (1.19,1.81) | 1.43 (1.24,1.64) | 1.66 (1.45,1.90) | 1.67 (1.30,2.14)           | 1.25 (0.96,1.64) | 0.74 (0.52,1.04) | 1.09 (0.87,1.35) | 0.97 (0.83,1.13) | 1.08 (0.92,1.25) | 1.03 (0.79,1.34) |
|                 | SAH and HS <sup>9</sup>          | 0.64 (0.53,0.78) | 0.66 (0.54,0.80) | 0.78 (0.68,0.89) | 0.88 (0.81,0.96) | 1.02 (0.94,1.11) | 1.02 (0.87,1.18)           | 0.64 (0.53,0.78) | 0.65 (0.54,0.80) | 0.77 (0.68,0.88) | 0.88 (0.80,0.96) | 1.03 (0.94,1.13) | 1.04 (0.89,1.21) |
|                 | Myocarditis                      | 2.21 (1.38,3.55) | 1.52 (0.86,2.66) | 1.15 (0.72,1.81) | 1.47 (1.16,1.85) | 1.26 (1.00,1.58) | 1.96 (1.33,2.89)           | 2.05 (1.28,3.29) | 1.41 (0.81,2.48) | 1.07 (0.67,1.70) | 1.34 (1.05,1.70) | 1.12 (0.89,1.41) | 1.66 (1.12,2.47) |
|                 | Pericarditis                     | 0.98 (0.46,2.07) | 0.85 (0.38,1.93) | 1.07 (0.63,1.82) | 1.87 (1.46,2.40) | 1.75 (1.38,2.21) | 0.89 (0.44,1.78)           | 0.87 (0.41,1.86) | 0.77 (0.34,1.74) | 0.95 (0.56,1.63) | 1.61 (1.24,2.08) | 1.50 (1.17,1.92) | 0.74 (0.37,1.50) |

Supplementary Table 10: Hazard ratios and 95% CIs for individual arterial and venous thrombotic events, and other cardiovascular events, by time since first dose vaccination with mRNA-1273.

| Outcome                     | Age and Sex adjusted HR (95% CI) |                   |                   |                   |                   |                   | Fully Adjusted HR (95% CI) |                   |                   |                   |                   |                   |
|-----------------------------|----------------------------------|-------------------|-------------------|-------------------|-------------------|-------------------|----------------------------|-------------------|-------------------|-------------------|-------------------|-------------------|
|                             | Week 1                           | Week 2            | Weeks 3-4         | Weeks 5-12        | Weeks 13-24       | Weeks 25-26       | Week 1                     | Week 2            | Weeks 3-4         | Weeks 5-12        | Weeks 13-24       | Weeks 25-26       |
| <b>Arterial</b>             |                                  |                   |                   |                   |                   |                   |                            |                   |                   |                   |                   |                   |
| Composite arterial          | 0.74 (0.41, 1.34)                | 0.60 (0.31, 1.16) | 1.09 (0.77, 1.55) | 0.76 (0.61, 0.94) | 0.66 (0.54, 0.80) | 0.89 (0.58, 1.37) | 0.74 (0.41, 1.34)          | 0.60 (0.31, 1.16) | 1.08 (0.76, 1.53) | 0.75 (0.60, 0.93) | 0.64 (0.52, 0.78) | 0.86 (0.56, 1.32) |
| AMI <sup>2</sup>            | 0.69 (0.31, 1.53)                | 0.69 (0.31, 1.53) | 1.16 (0.74, 1.80) | 0.67 (0.50, 0.91) | 0.69 (0.54, 0.90) | 0.63 (0.33, 1.22) | 0.71 (0.32, 1.58)          | 0.69 (0.31, 1.55) | 1.17 (0.75, 1.82) | 0.68 (0.50, 0.92) | 0.68 (0.53, 0.89) | 0.60 (0.31, 1.16) |
| Ischaemic stroke            | 0.96 (0.43, 2.14)                | 0.48 (0.15, 1.49) | 0.89 (0.49, 1.62) | 0.82 (0.59, 1.13) | 0.56 (0.40, 0.79) | 1.28 (0.72, 2.26) | 0.94 (0.42, 2.10)          | 0.48 (0.15, 1.49) | 0.89 (0.49, 1.62) | 0.80 (0.57, 1.12) | 0.53 (0.38, 0.76) | 1.18 (0.66, 2.09) |
| <b>Venous</b>               |                                  |                   |                   |                   |                   |                   |                            |                   |                   |                   |                   |                   |
| Composite venous            | 0.91 (0.47, 1.74)                | 0.90 (0.47, 1.73) | 0.69 (0.41, 1.18) | 0.69 (0.53, 0.90) | 0.63 (0.50, 0.79) | 1.05 (0.68, 1.64) | 0.90 (0.47, 1.73)          | 0.90 (0.47, 1.73) | 0.69 (0.41, 1.17) | 0.68 (0.52, 0.89) | 0.62 (0.49, 0.78) | 1.03 (0.66, 1.60) |
| Lower limb DVT <sup>7</sup> | 0.17 (0.02, 1.24)                | 0.86 (0.36, 2.08) | 0.78 (0.40, 1.50) | 0.67 (0.47, 0.96) | 0.53 (0.38, 0.74) | 1.18 (0.67, 2.09) | 0.17 (0.02, 1.23)          | 0.87 (0.36, 2.11) | 0.77 (0.40, 1.48) | 0.66 (0.47, 0.95) | 0.52 (0.37, 0.73) | 1.15 (0.65, 2.04) |
| Pulmonary embolism          | 1.69 (0.80, 3.57)                | 0.96 (0.36, 2.57) | 0.59 (0.25, 1.43) | 0.73 (0.49, 1.07) | 0.73 (0.53, 1.00) | 0.89 (0.44, 1.80) | 1.62 (0.77, 3.42)          | 0.91 (0.34, 2.43) | 0.57 (0.23, 1.36) | 0.69 (0.47, 1.02) | 0.70 (0.51, 0.96) | 0.84 (0.42, 1.70) |
| ICVT <sup>8*</sup>          |                                  |                   | 1.40 (0.33, 5.99) |                   |                   | 0.59 (0.21, 1.67) |                            |                   | 1.50 (0.36, 6.23) |                   |                   | 0.57 (0.20, 1.63) |
| Mesenteric thrombus*        |                                  |                   | 1.96 (0.47, 8.13) |                   |                   | 0.76 (0.28, 2.08) |                            |                   | 1.72 (0.42, 7.09) |                   |                   | 0.67 (0.24, 1.82) |
| Portal vein thrombosis      |                                  |                   |                   |                   |                   |                   |                            |                   |                   |                   |                   |                   |
| <b>Other</b>                |                                  |                   |                   |                   |                   |                   |                            |                   |                   |                   |                   |                   |
| Any thrombocytopenia        |                                  |                   | 2.17 (1.01, 4.66) |                   |                   | 1.22 (0.75, 1.98) |                            |                   | 1.99 (0.92, 4.32) |                   |                   | 1.12 (0.69, 1.83) |
| SAH and HS <sup>9</sup>     |                                  |                   | 0.80 (0.33, 1.95) |                   |                   | 0.80 (0.53, 1.20) |                            |                   | 0.83 (0.34, 2.03) |                   |                   | 0.82 (0.54, 1.25) |
| Myocarditis                 | 5.57 (1.70,18.26)                | 1.63 (0.22,11.86) | 0.87 (0.12, 6.42) | 5.64 (3.61, 8.81) | 1.95 (1.12, 3.40) | 2.09 (0.49, 8.88) | 4.64 (1.40,15.31)          | 1.52 (0.21,10.99) | 0.87 (0.12, 6.45) | 5.35 (3.37, 8.48) | 1.78 (1.00, 3.16) | 2.05 (0.49, 8.66) |
| Pericarditis                | 1.75 (0.24,12.93)                | 1.91 (0.26,13.99) | 2.07 (0.49, 8.79) | 1.97 (0.87, 4.44) | 1.83 (0.89, 3.79) | 2.34 (0.56, 9.84) | 2.01 (0.26,15.31)          | 1.85 (0.25,13.87) | 2.11 (0.49, 9.06) | 1.94 (0.88, 4.29) | 1.95 (0.95, 4.01) | 2.16 (0.52, 9.01) |

\*Time periods collapsed into weeks 0-4 and weeks 5-26.

Models could not be run for portal vein thrombosis.

Supplementary Table 11: Hazard ratios and 95% CIs for individual arterial and venous thrombotic events, and other cardiovascular events, by time since second dose vaccination for those on a primary course of ChAdOx1

| Outcome         |                             | Age and Sex adjusted HR (95% CI) |                  |                  |                  |                  |                  | Fully Adjusted HR (95% CI) |                  |                  |                  |                  |                  |
|-----------------|-----------------------------|----------------------------------|------------------|------------------|------------------|------------------|------------------|----------------------------|------------------|------------------|------------------|------------------|------------------|
|                 |                             | Week 1                           | Week 2           | Weeks 3-4        | Weeks 5-12       | Weeks 13-24      | Weeks 25-26      | Week 1                     | Week 2           | Weeks 3-4        | Weeks 5-12       | Weeks 13-24      | Weeks 25-26      |
| <b>Arterial</b> | Composite arterial          | 0.73 (0.70,0.76)                 | 0.84 (0.81,0.88) | 0.81 (0.78,0.84) | 0.78 (0.76,0.81) | 0.78 (0.75,0.81) | 0.81 (0.77,0.85) | 0.72 (0.69,0.75)           | 0.83 (0.80,0.87) | 0.79 (0.77,0.82) | 0.76 (0.74,0.78) | 0.73 (0.70,0.76) | 0.73 (0.70,0.77) |
|                 | AMI <sup>2</sup>            | 0.76 (0.71,0.80)                 | 0.87 (0.82,0.92) | 0.86 (0.82,0.89) | 0.83 (0.80,0.87) | 0.84 (0.80,0.89) | 0.88 (0.82,0.95) | 0.73 (0.69,0.78)           | 0.84 (0.79,0.89) | 0.82 (0.78,0.85) | 0.77 (0.74,0.80) | 0.73 (0.70,0.77) | 0.73 (0.68,0.79) |
|                 | Ischaemic stroke            | 0.71 (0.67,0.75)                 | 0.82 (0.77,0.87) | 0.77 (0.74,0.81) | 0.75 (0.72,0.78) | 0.75 (0.70,0.79) | 0.76 (0.70,0.82) | 0.71 (0.67,0.76)           | 0.83 (0.78,0.88) | 0.78 (0.75,0.82) | 0.76 (0.73,0.80) | 0.76 (0.72,0.80) | 0.77 (0.71,0.83) |
| <b>Venous</b>   | Composite venous            | 0.74 (0.67,0.80)                 | 0.86 (0.79,0.94) | 0.82 (0.77,0.88) | 0.75 (0.70,0.80) | 0.75 (0.69,0.81) | 0.80 (0.72,0.89) | 0.72 (0.66,0.79)           | 0.84 (0.78,0.92) | 0.80 (0.75,0.85) | 0.71 (0.67,0.75) | 0.68 (0.63,0.73) | 0.69 (0.63,0.77) |
|                 | Lower limb DVT <sup>7</sup> | 0.72 (0.64,0.83)                 | 0.81 (0.72,0.92) | 0.80 (0.72,0.88) | 0.71 (0.64,0.77) | 0.68 (0.61,0.77) | 0.72 (0.61,0.84) | 0.71 (0.63,0.81)           | 0.80 (0.70,0.90) | 0.77 (0.70,0.86) | 0.67 (0.61,0.73) | 0.62 (0.55,0.69) | 0.62 (0.54,0.73) |
|                 | Pulmonary embolism          | 0.76 (0.67,0.85)                 | 0.90 (0.81,1.01) | 0.83 (0.76,0.91) | 0.78 (0.72,0.85) | 0.79 (0.71,0.89) | 0.85 (0.73,0.98) | 0.75 (0.66,0.84)           | 0.88 (0.79,0.99) | 0.81 (0.74,0.89) | 0.74 (0.68,0.80) | 0.71 (0.64,0.79) | 0.73 (0.64,0.84) |
|                 | ICVT <sup>8</sup>           | 0.30 (0.11,0.84)                 | 0.96 (0.51,1.80) | 0.93 (0.56,1.56) | 0.67 (0.40,1.12) | 0.74 (0.37,1.48) | 0.90 (0.33,2.44) | 0.29 (0.11,0.82)           | 0.94 (0.50,1.76) | 0.88 (0.53,1.48) | 0.61 (0.36,1.04) | 0.63 (0.31,1.28) | 0.73 (0.27,1.96) |
|                 | Mesenteric thrombus         | 0.64 (0.47,0.87)                 | 1.05 (0.81,1.36) | 0.77 (0.61,0.97) | 0.77 (0.62,0.96) | 0.76 (0.58,1.01) | 0.76 (0.52,1.09) | 0.62 (0.45,0.84)           | 1.01 (0.78,1.31) | 0.73 (0.58,0.92) | 0.70 (0.57,0.87) | 0.64 (0.49,0.83) | 0.60 (0.42,0.85) |
|                 | Portal vein thrombosis      | 0.66 (0.25,1.71)                 | 0.39 (0.11,1.37) | 0.92 (0.46,1.85) | 1.26 (0.67,2.38) | 1.44 (0.55,3.75) | 2.50 (0.70,8.87) | 0.49 (0.18,1.34)           | 0.31 (0.09,1.09) | 0.67 (0.32,1.40) | 0.72 (0.36,1.43) | 0.52 (0.19,1.42) | 0.78 (0.22,2.74) |
| <b>Other</b>    | Any thrombocytopenia        | 0.89 (0.69,1.14)                 | 0.76 (0.57,1.01) | 0.95 (0.76,1.18) | 1.01 (0.81,1.25) | 1.43 (1.05,1.96) | 1.83 (1.18,2.82) | 0.73 (0.57,0.94)           | 0.60 (0.46,0.79) | 0.71 (0.57,0.87) | 0.62 (0.52,0.75) | 0.66 (0.51,0.86) | 0.67 (0.46,0.96) |
|                 | SAH and HS <sup>9</sup>     | 0.61 (0.51,0.72)                 | 0.76 (0.64,0.89) | 0.75 (0.66,0.85) | 0.68 (0.60,0.76) | 0.60 (0.52,0.69) | 0.59 (0.49,0.72) | 0.62 (0.52,0.74)           | 0.77 (0.66,0.91) | 0.78 (0.68,0.88) | 0.71 (0.63,0.80) | 0.64 (0.56,0.74) | 0.64 (0.53,0.77) |
|                 | Myocarditis                 | 0.49 (0.23,1.07)                 | 0.75 (0.40,1.40) | 0.64 (0.38,1.07) | 0.75 (0.51,1.12) | 0.68 (0.40,1.13) | 0.73 (0.36,1.48) | 0.48 (0.22,1.04)           | 0.75 (0.40,1.40) | 0.63 (0.38,1.05) | 0.72 (0.50,1.05) | 0.64 (0.40,1.02) | 0.67 (0.35,1.29) |
|                 | Pericarditis                | 1.34 (0.84,2.16)                 | 0.80 (0.44,1.45) | 0.69 (0.43,1.10) | 0.50 (0.33,0.75) | 0.49 (0.29,0.81) | 0.59 (0.28,1.21) | 1.21 (0.76,1.95)           | 0.68 (0.38,1.24) | 0.58 (0.36,0.91) | 0.39 (0.26,0.57) | 0.32 (0.19,0.51) | 0.33 (0.17,0.65) |

Supplementary Table 12: Hazard ratios and 95% CIs for individual arterial and venous thrombotic events, and other cardiovascular events, by time since second dose vaccination for those on a primary course of BNT-162b2.

| Outcome         |                             | Age and Sex adjusted HR (95% CI) |                  |                  |                  |                  |                  | Fully Adjusted HR (95% CI) |                  |                  |                  |                  |                  |
|-----------------|-----------------------------|----------------------------------|------------------|------------------|------------------|------------------|------------------|----------------------------|------------------|------------------|------------------|------------------|------------------|
|                 |                             | Week 1                           | Week 2           | Weeks 3-4        | Weeks 5-12       | Weeks 13-24      | Weeks 25-26      | Week 1                     | Week 2           | Weeks 3-4        | Weeks 5-12       | Weeks 13-24      | Weeks 25-26      |
| <b>Arterial</b> | Composite arterial          | 0.71 (0.68,0.75)                 | 0.80 (0.77,0.84) | 0.81 (0.78,0.84) | 0.80 (0.78,0.83) | 0.80 (0.77,0.83) | 0.80 (0.76,0.84) | 0.73 (0.69,0.76)           | 0.82 (0.78,0.85) | 0.82 (0.79,0.85) | 0.81 (0.78,0.83) | 0.80 (0.77,0.83) | 0.80 (0.76,0.85) |
|                 | AMI <sup>2</sup>            | 0.70 (0.65,0.75)                 | 0.85 (0.79,0.90) | 0.83 (0.79,0.88) | 0.82 (0.79,0.86) | 0.85 (0.81,0.89) | 0.86 (0.80,0.93) | 0.71 (0.66,0.76)           | 0.85 (0.80,0.91) | 0.84 (0.79,0.88) | 0.81 (0.78,0.85) | 0.82 (0.78,0.87) | 0.83 (0.77,0.90) |
|                 | Ischaemic stroke            | 0.73 (0.68,0.78)                 | 0.76 (0.71,0.81) | 0.78 (0.74,0.82) | 0.79 (0.75,0.82) | 0.76 (0.72,0.80) | 0.75 (0.70,0.81) | 0.74 (0.69,0.79)           | 0.77 (0.72,0.82) | 0.79 (0.75,0.83) | 0.80 (0.76,0.84) | 0.77 (0.72,0.81) | 0.76 (0.71,0.83) |
| <b>Venous</b>   | Composite venous            | 0.73 (0.66,0.81)                 | 0.82 (0.74,0.91) | 0.77 (0.71,0.84) | 0.79 (0.74,0.84) | 0.83 (0.77,0.89) | 0.82 (0.74,0.91) | 0.73 (0.66,0.81)           | 0.82 (0.74,0.90) | 0.77 (0.71,0.83) | 0.76 (0.72,0.81) | 0.77 (0.72,0.83) | 0.74 (0.67,0.83) |
|                 | Lower limb DVT <sup>7</sup> | 0.74 (0.63,0.87)                 | 0.84 (0.72,0.98) | 0.83 (0.73,0.94) | 0.81 (0.74,0.89) | 0.82 (0.73,0.91) | 0.77 (0.65,0.91) | 0.75 (0.63,0.88)           | 0.85 (0.73,0.99) | 0.84 (0.74,0.95) | 0.82 (0.74,0.90) | 0.81 (0.73,0.91) | 0.77 (0.65,0.91) |
|                 | Pulmonary embolism          | 0.72 (0.63,0.83)                 | 0.79 (0.69,0.91) | 0.74 (0.66,0.82) | 0.76 (0.70,0.83) | 0.83 (0.75,0.92) | 0.84 (0.73,0.97) | 0.73 (0.63,0.84)           | 0.80 (0.69,0.91) | 0.74 (0.66,0.82) | 0.74 (0.68,0.81) | 0.79 (0.71,0.87) | 0.78 (0.68,0.90) |
|                 | ICVT <sup>8</sup>           | 0.47 (0.17,1.30)                 | 1.16 (0.55,2.44) | 0.71 (0.36,1.37) | 0.74 (0.47,1.16) | 0.88 (0.53,1.47) | 0.34 (0.11,1.06) | 0.51 (0.18,1.43)           | 1.28 (0.61,2.70) | 0.76 (0.38,1.50) | 0.77 (0.49,1.21) | 0.87 (0.52,1.45) | 0.32 (0.10,0.99) |
|                 | Mesenteric thrombus         | 0.55 (0.38,0.80)                 | 0.71 (0.52,0.99) | 0.86 (0.67,1.11) | 0.66 (0.53,0.83) | 0.71 (0.54,0.92) | 0.70 (0.49,1.02) | 0.54 (0.38,0.79)           | 0.70 (0.51,0.97) | 0.84 (0.65,1.08) | 0.63 (0.50,0.79) | 0.64 (0.49,0.83) | 0.63 (0.43,0.91) |
|                 | Portal vein thrombosis      | 0.68 (0.23,2.01)                 | 0.33 (0.07,1.49) | 0.64 (0.23,1.76) | 0.93 (0.48,1.81) | 0.89 (0.41,1.91) | 0.70 (0.22,2.22) | 0.57 (0.17,1.97)           | 0.28 (0.06,1.28) | 0.61 (0.21,1.81) | 0.79 (0.36,1.72) | 0.60 (0.22,1.70) | 0.48 (0.11,2.06) |
| <b>Other</b>    | Any thrombocytopenia        | 0.84 (0.62,1.13)                 | 0.77 (0.56,1.05) | 1.00 (0.80,1.25) | 0.89 (0.74,1.06) | 1.18 (0.95,1.47) | 1.39 (0.99,1.96) | 0.78 (0.58,1.06)           | 0.72 (0.52,0.98) | 0.92 (0.73,1.16) | 0.74 (0.62,0.89) | 0.87 (0.70,1.09) | 0.94 (0.67,1.33) |
|                 | SAH and HS <sup>9</sup>     | 0.69 (0.56,0.85)                 | 0.83 (0.68,1.00) | 0.95 (0.82,1.10) | 0.86 (0.76,0.98) | 0.81 (0.69,0.94) | 0.73 (0.59,0.91) | 0.70 (0.57,0.86)           | 0.85 (0.70,1.02) | 0.97 (0.84,1.13) | 0.89 (0.78,1.01) | 0.84 (0.73,0.98) | 0.77 (0.62,0.96) |
|                 | Myocarditis                 | 3.21 (2.10,4.92)                 | 1.60 (0.93,2.77) | 0.97 (0.58,1.61) | 1.07 (0.77,1.49) | 0.92 (0.65,1.31) | 1.32 (0.71,2.43) | 3.14 (2.04,4.85)           | 1.63 (0.94,2.82) | 0.98 (0.59,1.63) | 1.11 (0.79,1.56) | 0.95 (0.66,1.38) | 1.42 (0.76,2.65) |
|                 | Pericarditis                | 0.91 (0.43,1.90)                 | 1.44 (0.80,2.61) | 2.37 (1.59,3.54) | 1.38 (0.98,1.93) | 1.18 (0.79,1.77) | 1.65 (0.84,3.23) | 0.86 (0.41,1.81)           | 1.45 (0.80,2.63) | 2.42 (1.62,3.62) | 1.34 (0.96,1.88) | 1.16 (0.77,1.72) | 1.61 (0.83,3.13) |

Supplementary Table 13: Hazard ratios and 95% CIs for individual arterial and venous thrombotic events, and other cardiovascular events, by time since second dose vaccination for those on a primary course of mRNA-1273.

| Outcome         |                                               | Age and Sex adjusted HR (95% CI) |                   |                    |                   |                   |                   | Fully Adjusted HR (95% CI) |                   |                    |                   |                   |                   |
|-----------------|-----------------------------------------------|----------------------------------|-------------------|--------------------|-------------------|-------------------|-------------------|----------------------------|-------------------|--------------------|-------------------|-------------------|-------------------|
|                 |                                               | Week 1                           | Week 2            | Weeks 3-4          | Weeks 5-12        | Weeks 13-24       | Weeks 25-26       | Week 1                     | Week 2            | Weeks 3-4          | Weeks 5-12        | Weeks 13-24       | Weeks 25-26       |
| <b>Arterial</b> | Composite arterial                            | 0.56 (0.26, 1.21)                | 1.38 (0.78, 2.42) | 0.47 (0.24, 0.91)  | 0.64 (0.43, 0.94) | 0.74 (0.47, 1.17) | 0.35 (0.14, 0.92) | 0.78 (0.36, 1.67)          | 1.60 (0.90, 2.85) | 0.62 (0.32, 1.23)  | 0.81 (0.52, 1.27) | 1.09 (0.64, 1.83) | 0.59 (0.22, 1.62) |
|                 | AMI <sup>2</sup>                              | 0.98 (0.38, 2.54)                | 2.08 (1.02, 4.25) | 0.45 (0.17, 1.19)  | 0.69 (0.37, 1.29) | 0.52 (0.27, 0.98) | 0.36 (0.11, 1.16) | 1.05 (0.40, 2.75)          | 2.39 (1.11, 5.17) | 0.59 (0.23, 1.51)  | 0.86 (0.44, 1.69) | 0.75 (0.34, 1.66) | 0.53 (0.14, 2.07) |
|                 | Ischaemic stroke                              | 0.22 (0.05, 1.01)                | 0.76 (0.25, 2.34) | 0.50 (0.18, 1.39)  | 0.66 (0.35, 1.24) | 1.01 (0.49, 2.11) | 0.12 (0.01, 0.97) | 0.39 (0.08, 1.89)          | 1.13 (0.38, 3.35) | 0.56 (0.19, 1.67)  | 0.69 (0.35, 1.34) | 1.11 (0.55, 2.22) | 0.13 (0.02, 0.83) |
| <b>Venous</b>   | Composite venous                              | 0.65 (0.28, 1.52)                | 0.21 (0.05, 0.88) | 0.81 (0.44, 1.49)  | 0.61 (0.39, 0.95) | 0.57 (0.36, 0.90) | 0.25 (0.06, 1.05) | 0.74 (0.31, 1.77)          | 0.24 (0.06, 0.99) | 0.85 (0.45, 1.59)  | 0.72 (0.45, 1.16) | 0.81 (0.46, 1.45) | 0.41 (0.08, 2.00) |
|                 | Lower limb DVT <sup>7</sup>                   | 0.66 (0.23, 1.89)                | 0.16 (0.02, 1.23) | 0.46 (0.18, 1.20)  | 0.38 (0.20, 0.71) | 0.40 (0.20, 0.77) | 0.20 (0.02, 1.67) | 0.95 (0.32, 2.78)          | 0.20 (0.03, 1.56) | 0.56 (0.20, 1.53)  | 0.49 (0.24, 0.99) | 0.52 (0.25, 1.08) | 0.30 (0.04, 2.38) |
|                 | Pulmonary embolism                            | 0.64 (0.15, 2.82)                | 0.33 (0.04, 2.52) | 1.48 (0.64, 3.43)  | 0.94 (0.47, 1.88) | 0.80 (0.39, 1.63) | 0.32 (0.04, 2.72) | 0.65 (0.14, 3.02)          | 0.27 (0.03, 2.45) | 1.54 (0.68, 3.51)  | 1.01 (0.50, 2.07) | 0.96 (0.46, 1.97) | 0.36 (0.04, 3.01) |
|                 | ICVT <sup>8</sup>                             |                                  |                   |                    |                   |                   |                   |                            |                   |                    |                   |                   |                   |
|                 | Mesenteric thrombus<br>Portal vein thrombosis |                                  |                   |                    |                   |                   |                   |                            |                   |                    |                   |                   |                   |
| <b>Other</b>    | Any thrombocytopenia*                         |                                  |                   | 1.17 (0.31, 4.37)  |                   |                   |                   | 0.92 (0.15, 5.45)          |                   | 1.08 (0.24, 4.84)  |                   |                   | 0.91 (0.11, 7.52) |
|                 | SAH and HS <sup>9</sup> *                     |                                  |                   | 0.36 (0.06, 2.28)  |                   |                   |                   | 1.02 (0.31, 3.33)          |                   | 0.25 (0.04, 1.63)  |                   |                   | 0.70 (0.24, 2.10) |
|                 | Myocarditis*                                  |                                  |                   | 7.62 (2.82, 20.58) |                   |                   |                   | 0.47 (0.14, 1.50)          |                   | 10.8 (3.79, 30.83) |                   |                   | 0.65 (0.20, 2.11) |
|                 | Pericarditis*                                 |                                  |                   | 1.93 (0.58, 6.44)  |                   |                   |                   | 1.06 (0.27, 4.11)          |                   | 1.40 (0.30, 6.64)  |                   |                   | 0.54 (0.10, 2.98) |

\*Time periods collapsed into weeks 0-4 and weeks 5-26.  
Models could not be run for ICVT, mesenteric thrombus, portal vein thrombosis.

Supplementary Table 14: Hazard ratios and 95% CIs for individual arterial and venous thrombotic events, and other cardiovascular events, by time since booster vaccination with mRNA-1273 for those on a primary course of ChAdOx1.

| Outcome         | Age and Sex adjusted HR (95% CI) |                  |                  |                  |                  | Fully Adjusted HR (95% CI) |                   |                   |                   |                   |
|-----------------|----------------------------------|------------------|------------------|------------------|------------------|----------------------------|-------------------|-------------------|-------------------|-------------------|
|                 | Week 1                           | Week 2           | Weeks 3-4        | Weeks 5-12       | Weeks 13-24      | Week 1                     | Week 2            | Weeks 3-4         | Weeks 5-12        | Weeks 13-24       |
| <b>Arterial</b> | Composite arterial*              | 0.64 (0.60,0.68) |                  |                  | 0.53 (0.49,0.57) |                            | 0.77 (0.73, 0.82) |                   | 0.67 (0.62, 0.72) |                   |
|                 | AMI <sup>2</sup> *               | 0.67 (0.62,0.73) |                  |                  | 0.58 (0.52,0.64) |                            | 0.79 (0.73, 0.86) |                   | 0.71 (0.64, 0.79) |                   |
|                 | Ischaemic stroke*                | 0.60 (0.54,0.66) |                  |                  | 0.45 (0.40,0.51) |                            | 0.75 (0.68, 0.82) |                   | 0.61 (0.53, 0.69) |                   |
| <b>Venous</b>   | Composite venous*                | 0.54 (0.48,0.61) |                  |                  | 0.50 (0.43,0.59) |                            | 0.58 (0.51, 0.66) |                   | 0.55 (0.47, 0.65) |                   |
|                 | Lower limb DVT <sup>7</sup> *    | 0.60 (0.50,0.72) |                  |                  | 0.54 (0.42,0.68) |                            | 0.64 (0.53, 0.77) |                   | 0.58 (0.46, 0.74) |                   |
|                 | Pulmonary embolism*              | 0.48 (0.40,0.57) |                  |                  | 0.48 (0.39,0.59) |                            | 0.52 (0.44, 0.62) |                   | 0.54 (0.44, 0.66) |                   |
|                 | ICVT <sup>8</sup> *              | 0.86 (0.32,2.30) |                  |                  | 0.82 (0.25,2.72) |                            | 0.92 (0.35, 2.43) |                   | 0.92 (0.29, 2.93) |                   |
|                 | Mesenteric thrombus*             | 0.45 (0.28,0.71) |                  |                  | 0.36 (0.19,0.66) |                            | 0.52 (0.33, 0.82) |                   | 0.41 (0.22, 0.77) |                   |
|                 | Portal vein thrombosis           |                  |                  |                  |                  |                            |                   |                   |                   |                   |
| <b>Other</b>    | Any thrombocytopenia*            |                  | 0.79 (0.49,1.27) |                  |                  | 0.56 (0.27,1.18)           |                   |                   | 0.90 (0.56, 1.44) | 0.63 (0.30, 1.32) |
|                 | SAH and HS <sup>9</sup>          | 0.31 (0.17,0.58) | 0.53 (0.33,0.86) | 0.56 (0.39,0.81) | 0.52 (0.36,0.74) | NA (NA, NA)                |                   |                   |                   |                   |
|                 | Myocarditis*                     |                  | 0.67 (0.31,1.46) |                  |                  | 0.72 (0.24,2.16)           |                   | 0.72 (0.33, 1.56) |                   | 0.79 (0.26, 2.36) |
|                 | Pericarditis*                    |                  | 0.63 (0.24,1.60) |                  |                  | 0.12 (0.01,0.95)           |                   | 0.63 (0.25, 1.62) |                   | 0.12 (0.01, 0.98) |

\*Time periods collapsed into weeks 0-4 and weeks 5-24.  
Models could not be run for portal vein thrombosis and part of SAH and HS.  
NA (NA-NA) Could not obtain estimate for this time interval

Supplementary Table 15: Hazard ratios and 95% CIs for individual arterial and venous thrombotic events, and other cardiovascular events, by time since booster vaccination with BNT-162b2 for those on a primary course of ChAdOx1.

| Outcome         |                             | Age and Sex adjusted HR (95% CI) |                  |                  |                  |                  | Fully Adjusted HR (95% CI) |                   |                   |                   |                   |
|-----------------|-----------------------------|----------------------------------|------------------|------------------|------------------|------------------|----------------------------|-------------------|-------------------|-------------------|-------------------|
|                 |                             | Week 1                           | Week 2           | Weeks 3-4        | Weeks 5-12       | Weeks 13-24      | Weeks 1                    | Week 2            | Week 3-4          | Weeks 5-12        | Weeks 13-24       |
| <b>Arterial</b> | Composite arterial          | 0.77 (0.73,0.80)                 | 0.79 (0.75,0.83) | 0.79 (0.76,0.82) | 0.73 (0.70,0.75) | 0.64 (0.60,0.69) | 0.79 (0.75, 0.83)          | 0.82 (0.78, 0.86) | 0.83 (0.80, 0.86) | 0.78 (0.75, 0.81) | 0.71 (0.66, 0.76) |
|                 | AMI <sup>2</sup>            | 0.76 (0.71,0.81)                 | 0.81 (0.76,0.87) | 0.79 (0.75,0.83) | 0.73 (0.70,0.77) | 0.62 (0.55,0.69) | 0.76 (0.71, 0.82)          | 0.82 (0.76, 0.87) | 0.80 (0.76, 0.84) | 0.75 (0.72, 0.79) | 0.63 (0.57, 0.71) |
|                 | Ischaemic stroke            | 0.78 (0.73,0.84)                 | 0.78 (0.73,0.84) | 0.80 (0.76,0.85) | 0.74 (0.70,0.78) | 0.69 (0.62,0.76) | 0.82 (0.76, 0.88)          | 0.83 (0.77, 0.89) | 0.86 (0.82, 0.91) | 0.84 (0.80, 0.88) | 0.81 (0.73, 0.90) |
| <b>Venous</b>   | Composite venous            | 0.69 (0.62,0.77)                 | 0.77 (0.69,0.85) | 0.75 (0.69,0.81) | 0.68 (0.63,0.73) | 0.68 (0.58,0.80) | 0.67 (0.60, 0.75)          | 0.74 (0.67, 0.83) | 0.73 (0.67, 0.79) | 0.64 (0.60, 0.69) | 0.63 (0.54, 0.74) |
|                 | Lower limb DVT <sup>7</sup> | 0.73 (0.61,0.86)                 | 0.90 (0.77,1.05) | 0.83 (0.74,0.94) | 0.69 (0.62,0.78) | 0.84 (0.66,1.07) | 0.71 (0.60, 0.84)          | 0.87 (0.75, 1.02) | 0.81 (0.71, 0.91) | 0.66 (0.59, 0.74) | 0.76 (0.60, 0.97) |
|                 | Pulmonary embolism          | 0.65 (0.57,0.75)                 | 0.68 (0.59,0.78) | 0.68 (0.61,0.76) | 0.64 (0.58,0.70) | 0.56 (0.46,0.70) | 0.64 (0.55, 0.73)          | 0.66 (0.58, 0.76) | 0.66 (0.60, 0.74) | 0.61 (0.56, 0.67) | 0.53 (0.43, 0.65) |
|                 | ICVT <sup>8*</sup>          |                                  | 0.75 (0.38,1.46) |                  | 0.86 (0.38,1.98) |                  |                            | 0.72 (0.37,1.40)  |                   | 0.76 (0.35,1.68)  |                   |
|                 | Mesenteric thrombus         | 0.56 (0.38,0.81)                 | 0.63 (0.44,0.90) | 0.53 (0.39,0.71) | 0.60 (0.47,0.76) | 0.75 (0.48,1.17) | 0.56 (0.38, 0.82)          | 0.64 (0.45, 0.92) | 0.55 (0.41, 0.74) | 0.65 (0.51, 0.82) | 0.84 (0.53, 1.31) |
|                 | Portal vein thrombosis      | 0.68 (0.20,2.30)                 | 0.22 (0.03,1.69) | 0.57 (0.21,1.53) | 0.69 (0.32,1.50) | 0.79 (0.14,4.41) | 0.64 (0.18, 2.32)          | 0.16 (0.02, 1.42) | 0.42 (0.14, 1.26) | 0.50 (0.21, 1.18) | 0.58 (0.08, 4.19) |
| <b>Other</b>    | Any thrombocytopenia        | 1.49 (1.08,2.06)                 | 1.42 (1.01,2.00) | 1.47 (1.11,1.94) | 1.56 (1.19,2.05) | 3.76 (2.19,6.47) | 1.26 (0.92, 1.73)          | 1.17 (0.83, 1.64) | 1.16 (0.88, 1.53) | 1.09 (0.84, 1.41) | 2.16 (1.26, 3.69) |
|                 | SAH and HS <sup>9</sup>     | 0.65 (0.53,0.81)                 | 0.71 (0.58,0.87) | 0.66 (0.57,0.78) | 0.73 (0.64,0.83) | 0.73 (0.55,0.98) | 0.68 (0.55, 0.84)          | 0.74 (0.60, 0.91) | 0.70 (0.60, 0.82) | 0.80 (0.70, 0.91) | 0.82 (0.61, 1.09) |
|                 | Myocarditis                 | 1.42 (0.74,2.73)                 | 1.05 (0.49,2.24) | 0.97 (0.53,1.79) | 0.75 (0.43,1.33) | 0.38 (0.05,3.04) | 1.32 (0.68, 2.56)          | 0.99 (0.46, 2.11) | 0.90 (0.49, 1.65) | 0.65 (0.37, 1.15) | 0.30 (0.04, 2.36) |
|                 | Pericarditis                | 0.56 (0.20,1.53)                 | 1.39 (0.69,2.81) | 0.41 (0.17,0.96) | 1.01 (0.58,1.76) | 0.35 (0.04,2.81) | 0.52 (0.19, 1.43)          | 1.26 (0.62, 2.55) | 0.37 (0.16, 0.87) | 0.82 (0.47, 1.42) | 0.25 (0.03, 1.96) |

\*Time periods collapsed into weeks 0-4 and weeks 5-24.



Supplementary Table 16: Hazard ratios and 95% CIs for individual arterial and venous thrombotic events, and other cardiovascular events, by time since booster vaccination with mRNA-1273 or BNT-162b2 for those on a primary course of ChAdOx1.

| Outcome         |                             | Age and Sex adjusted HR (95% CI) |                  |                  |                  |                  | Fully Adjusted HR (95% CI) |                  |                  |                  |                  |
|-----------------|-----------------------------|----------------------------------|------------------|------------------|------------------|------------------|----------------------------|------------------|------------------|------------------|------------------|
|                 |                             | Week 1                           | Week 2           | Weeks 3-4        | Weeks 5-12       | Weeks 13-24      | Week 1                     | Week 2           | Weeks 3-4        | Weeks 5-12       | Weeks 13-24      |
| <b>Arterial</b> | Composite arterial          | 0.75 (0.72,0.79)                 | 0.78 (0.74,0.82) | 0.78 (0.75,0.81) | 0.73 (0.70,0.75) | 0.66 (0.62,0.71) | 0.79 (0.75,0.83)           | 0.82 (0.79,0.86) | 0.83 (0.80,0.86) | 0.78 (0.76,0.81) | 0.73 (0.67,0.78) |
|                 | AMI <sup>2</sup>            | 0.74 (0.70,0.79)                 | 0.78 (0.74,0.84) | 0.78 (0.74,0.82) | 0.73 (0.70,0.76) | 0.62 (0.56,0.69) | 0.77 (0.72,0.82)           | 0.81 (0.76,0.86) | 0.81 (0.77,0.85) | 0.75 (0.72,0.79) | 0.64 (0.58,0.71) |
|                 | Ischaemic stroke            | 0.77 (0.72,0.82)                 | 0.77 (0.72,0.83) | 0.78 (0.74,0.82) | 0.73 (0.70,0.77) | 0.71 (0.64,0.79) | 0.82 (0.76,0.87)           | 0.83 (0.78,0.89) | 0.84 (0.80,0.89) | 0.82 (0.78,0.86) | 0.81 (0.73,0.90) |
| <b>Venous</b>   | Composite venous            | 0.66 (0.60,0.73)                 | 0.76 (0.69,0.83) | 0.71 (0.66,0.77) | 0.67 (0.63,0.72) | 0.67 (0.58,0.79) | 0.66 (0.59,0.72)           | 0.75 (0.68,0.82) | 0.70 (0.65,0.76) | 0.64 (0.60,0.69) | 0.63 (0.54,0.74) |
|                 | Lower limb DVT <sup>7</sup> | 0.69 (0.59,0.80)                 | 0.89 (0.77,1.03) | 0.81 (0.72,0.92) | 0.71 (0.64,0.80) | 0.89 (0.70,1.13) | 0.68 (0.58,0.80)           | 0.89 (0.77,1.03) | 0.81 (0.72,0.91) | 0.70 (0.63,0.78) | 0.84 (0.66,1.06) |
|                 | Pulmonary embolism          | 0.63 (0.55,0.72)                 | 0.66 (0.58,0.75) | 0.64 (0.58,0.71) | 0.64 (0.58,0.70) | 0.57 (0.47,0.71) | 0.63 (0.55,0.71)           | 0.66 (0.58,0.74) | 0.64 (0.57,0.70) | 0.62 (0.56,0.68) | 0.55 (0.44,0.67) |
|                 | ICVT <sup>8*</sup>          |                                  | 0.78 (0.43,1.42) |                  |                  | 0.83 (0.39,1.78) |                            |                  | 0.76 (0.41,1.38) |                  | 0.78 (0.36,1.68) |
|                 | Mesenteric thrombus         | 0.51 (0.35,0.74)                 | 0.55 (0.38,0.79) | 0.58 (0.44,0.75) | 0.59 (0.46,0.75) | 0.83 (0.53,1.31) | 0.52 (0.36,0.75)           | 0.56 (0.39,0.80) | 0.60 (0.46,0.79) | 0.61 (0.48,0.77) | 0.85 (0.54,1.34) |
|                 | Portal vein thrombosis      | 0.62 (0.21,1.80)                 | 0.45 (0.14,1.48) | 0.58 (0.26,1.31) | 0.44 (0.20,0.98) | 0.45 (0.09,2.34) | 0.61 (0.20,1.91)           | 0.45 (0.13,1.59) | 0.68 (0.28,1.63) | 0.42 (0.19,0.94) | 0.27 (0.04,1.76) |
| <b>Other</b>    | Any thrombocytopenia        | 1.33 (0.97,1.81)                 | 1.30 (0.94,1.81) | 1.44 (1.10,1.88) | 1.53 (1.17,2.00) | 3.87 (2.27,6.59) | 1.14 (0.84,1.55)           | 1.09 (0.79,1.50) | 1.14 (0.88,1.48) | 1.05 (0.81,1.36) | 2.17 (1.27,3.71) |
|                 | SAH and HS <sup>9</sup>     | 0.59 (0.49,0.73)                 | 0.68 (0.56,0.82) | 0.65 (0.56,0.76) | 0.73 (0.64,0.83) | 0.80 (0.60,1.07) | 0.64 (0.52,0.78)           | 0.73 (0.61,0.89) | 0.71 (0.61,0.83) | 0.82 (0.72,0.94) | 0.93 (0.70,1.24) |
|                 | Myocarditis                 | 1.38 (0.77,2.46)                 | 1.04 (0.53,2.04) | 0.83 (0.45,1.52) | 0.80 (0.46,1.39) | 0.47 (0.06,3.75) | 1.34 (0.76,2.37)           | 1.01 (0.52,1.97) | 0.78 (0.43,1.43) | 0.70 (0.41,1.21) | 0.39 (0.05,3.07) |
|                 | Pericarditis                | 0.41 (0.15,1.13)                 | 1.20 (0.61,2.36) | 0.59 (0.30,1.14) | 0.88 (0.50,1.55) | 0.33 (0.04,2.63) | 0.40 (0.14,1.10)           | 1.17 (0.60,2.28) | 0.55 (0.29,1.07) | 0.79 (0.46,1.37) | 0.26 (0.03,1.98) |

\*Time periods collapsed into weeks 0-4 and weeks 5-24.

Supplementary Table 17: Hazard ratios and 95% CIs for individual arterial and venous thrombotic events, and other cardiovascular events, by time since booster vaccination with BNT-162b2 for those on a primary course of BNT-162b2.

| Outcome  | Age and Sex adjusted HR (95% CI) |                   |                   |                   |                   | Fully Adjusted HR (95% CI) |                   |                   |                   |                   |                   |
|----------|----------------------------------|-------------------|-------------------|-------------------|-------------------|----------------------------|-------------------|-------------------|-------------------|-------------------|-------------------|
|          | Week 1                           | Week 2            | Weeks 3-4         | Weeks 5-12        | Weeks 13-24       | Week 1                     | Week 2            | Weeks 3-4         | Weeks 5-12        | Weeks 13-24       |                   |
| Arterial | Composite arterial               | 0.66 (0.63, 0.70) | 0.74 (0.71, 0.78) | 0.75 (0.72, 0.78) | 0.70 (0.68, 0.73) | 0.63 (0.60, 0.67)          | 0.69 (0.65, 0.73) | 0.78 (0.74, 0.83) | 0.80 (0.77, 0.83) | 0.78 (0.75, 0.81) | 0.73 (0.69, 0.77) |
|          | AMI <sup>2</sup>                 | 0.66 (0.61, 0.71) | 0.76 (0.70, 0.81) | 0.79 (0.75, 0.84) | 0.72 (0.68, 0.75) | 0.63 (0.58, 0.68)          | 0.68 (0.63, 0.74) | 0.79 (0.73, 0.85) | 0.84 (0.79, 0.89) | 0.78 (0.75, 0.83) | 0.71 (0.66, 0.77) |
|          | Ischaemic stroke                 | 0.67 (0.62, 0.72) | 0.74 (0.69, 0.79) | 0.71 (0.67, 0.75) | 0.70 (0.66, 0.73) | 0.65 (0.60, 0.70)          | 0.71 (0.65, 0.76) | 0.79 (0.73, 0.85) | 0.78 (0.73, 0.82) | 0.80 (0.76, 0.84) | 0.78 (0.72, 0.85) |
| Venous   | Composite venous                 | 0.63 (0.56, 0.71) | 0.66 (0.59, 0.74) | 0.64 (0.59, 0.70) | 0.61 (0.56, 0.65) | 0.54 (0.48, 0.61)          | 0.63 (0.56, 0.71) | 0.66 (0.59, 0.74) | 0.65 (0.59, 0.71) | 0.62 (0.57, 0.66) | 0.56 (0.49, 0.63) |
|          | Lower limb DVT <sup>7</sup>      | 0.71 (0.59, 0.86) | 0.77 (0.64, 0.91) | 0.68 (0.59, 0.78) | 0.63 (0.56, 0.71) | 0.54 (0.44, 0.66)          | 0.71 (0.59, 0.86) | 0.76 (0.64, 0.91) | 0.68 (0.59, 0.78) | 0.63 (0.56, 0.71) | 0.55 (0.45, 0.67) |
|          | Pulmonary embolism               | 0.56 (0.48, 0.66) | 0.59 (0.51, 0.69) | 0.62 (0.55, 0.70) | 0.58 (0.53, 0.64) | 0.54 (0.46, 0.63)          | 0.56 (0.48, 0.66) | 0.59 (0.51, 0.69) | 0.62 (0.55, 0.70) | 0.59 (0.53, 0.65) | 0.55 (0.47, 0.65) |
|          | ICVT <sup>8*</sup>               | 0.50 (0.12, 2.11) | 0.56 (0.13, 2.34) | 0.74 (0.31, 1.78) | 0.76 (0.41, 1.40) | 0.83 (0.32, 2.13)          | 0.45 (0.11, 1.89) | 0.54 (0.13, 2.30) | 0.68 (0.28, 1.66) | 0.70 (0.37, 1.31) | 0.76 (0.29, 1.99) |
|          | Mesenteric thrombus              | 0.48 (0.33, 0.71) | 0.45 (0.30, 0.67) | 0.66 (0.51, 0.85) | 0.54 (0.43, 0.68) | 0.41 (0.28, 0.60)          | 0.49 (0.33, 0.73) | 0.46 (0.31, 0.68) | 0.68 (0.53, 0.88) | 0.56 (0.45, 0.71) | 0.43 (0.29, 0.64) |
|          | Portal vein thrombosis           |                   | 0.25 (0.09, 0.72) |                   | 0.51 (0.23, 1.14) |                            |                   | 0.27 (0.09, 0.80) |                   | 0.48 (0.19, 1.20) |                   |
| Other    | Any thrombocytopenia             | 0.84 (0.57, 1.24) | 0.56 (0.34, 0.91) | 1.12 (0.84, 1.49) | 0.86 (0.67, 1.11) | 1.20 (0.80, 1.81)          | 0.80 (0.54, 1.18) | 0.52 (0.32, 0.85) | 1.04 (0.78, 1.37) | 0.77 (0.60, 0.99) | 1.06 (0.71, 1.60) |
|          | SAH and HS <sup>9</sup>          | 0.71 (0.58, 0.88) | 0.83 (0.68, 1.02) | 0.85 (0.73, 0.99) | 0.73 (0.63, 0.84) | 0.63 (0.49, 0.79)          | 0.74 (0.60, 0.91) | 0.87 (0.72, 1.07) | 0.90 (0.77, 1.05) | 0.80 (0.69, 0.92) | 0.71 (0.56, 0.91) |
|          | Myocarditis                      | 1.83 (1.01, 3.32) | 1.05 (0.49, 2.25) | 1.24 (0.69, 2.23) | 0.88 (0.53, 1.48) | 0.34 (0.08, 1.50)          | 1.79 (0.98, 3.25) | 1.03 (0.48, 2.22) | 1.23 (0.68, 2.21) | 0.86 (0.51, 1.44) | 0.34 (0.08, 1.51) |
|          | Pericarditis                     | 0.98 (0.39, 2.47) | 1.99 (0.97, 4.10) | 1.17 (0.59, 2.31) | 1.32 (0.78, 2.24) | 1.33 (0.42, 4.23)          | 0.97 (0.38, 2.44) | 1.99 (0.96, 4.09) | 1.16 (0.58, 2.31) | 1.30 (0.76, 2.21) | 1.30 (0.41, 4.18) |

\*Time periods collapsed into weeks 0-4 and weeks 5-24.

Supplementary Table 18: Hazard ratios and 95% CIs for individual arterial and venous thrombotic events, and other cardiovascular events, by time since booster vaccination with mRNA-1273 for those on a primary course of BNT-162b2.

| Outcome  | Age and Sex adjusted HR (95% CI) |                   |                   |                   |                    | Fully Adjusted HR (95% CI) |                   |                   |                   |                    |                   |
|----------|----------------------------------|-------------------|-------------------|-------------------|--------------------|----------------------------|-------------------|-------------------|-------------------|--------------------|-------------------|
|          | Week 1                           | Week 2            | Weeks 3-4         | Weeks 5-12        | Weeks 13-24        | Week 1                     | Week 2            | Weeks 3-4         | Weeks 5-12        | Weeks 13-24        |                   |
| Arterial | Composite arterial               | 0.63 (0.52, 0.78) | 0.91 (0.77, 1.09) | 0.82 (0.71, 0.94) | 0.77 (0.69, 0.87)  | 0.88 (0.28, 2.79)          | 0.67 (0.55, 0.82) | 0.97 (0.81, 1.15) | 0.88 (0.77, 1.01) | 0.85 (0.75, 0.96)  | 1.21 (0.38, 3.86) |
|          | AMI <sup>2</sup>                 |                   | 0.86 (0.75, 0.98) |                   | 0.80 (0.68, 0.94)  |                            |                   | 0.90 (0.79, 1.04) |                   | 0.86 (0.73, 1.02)  |                   |
|          | Ischaemic stroke                 | 0.46 (0.33, 0.65) | 0.90 (0.70, 1.16) | 0.75 (0.61, 0.93) | 0.70 (0.59, 0.84)  | NA (NA, NA)                | 0.48 (0.34, 0.68) | 0.95 (0.74, 1.22) | 0.80 (0.65, 0.98) | 0.77 (0.64, 0.93)  | 2.29 (0.67, 7.82) |
| Venous   | Composite venous                 |                   | 0.60 (0.49, 0.74) |                   | 0.56 (0.44, 0.72)  |                            | 0.62 (0.50, 0.76) |                   |                   | 0.58 (0.45, 0.74)  |                   |
|          | Lower limb DVT <sup>7</sup>      |                   | 0.53 (0.39, 0.74) |                   | 0.48 (0.31, 0.72)  |                            | 0.52 (0.38, 0.73) |                   |                   | 0.46 (0.30, 0.69)  |                   |
|          | Pulmonary embolism               |                   | 0.66 (0.50, 0.87) |                   | 0.67 (0.49, 0.92)  |                            | 0.66 (0.50, 0.87) |                   |                   | 0.67 (0.49, 0.92)  |                   |
|          | ICVT <sup>8*</sup>               |                   | 0.28 (0.04, 1.86) |                   | 0.40 (0.05, 3.22)  |                            | 0.28 (0.04, 1.87) |                   |                   | 0.40 (0.05, 3.20)  |                   |
|          | Mesenteric thrombus              |                   | 0.69 (0.36, 1.33) |                   | 0.68 (0.31, 1.45)  |                            | 0.69 (0.35, 1.33) |                   |                   | 0.66 (0.30, 1.44)  |                   |
|          | Portal vein thrombosis           |                   | 0.65 (0.08, 5.17) |                   | 0.81 (0.08, 8.10)  |                            | 0.66 (0.08, 5.19) |                   |                   | 0.82 (0.08, 7.94)  |                   |
| Other    | Any thrombocytopenia             |                   | 1.04 (0.59, 1.84) |                   | 0.13 (0.02, 0.98)  |                            | 0.98 (0.56, 1.72) |                   |                   | 0.11 (0.01, 0.80)  |                   |
|          | SAH and HS <sup>9</sup>          |                   | 0.71 (0.46, 1.09) |                   | 0.64 (0.36, 1.14)  |                            | 0.76 (0.49, 1.18) |                   |                   | 0.70 (0.40, 1.25)  |                   |
|          | Myocarditis                      |                   | 0.92 (0.36, 2.34) |                   | 0.55 (0.08, 4.00)  |                            | 0.87 (0.34, 2.21) |                   |                   | 0.52 (0.07, 3.77)  |                   |
|          | Pericarditis                     |                   | 2.23 (0.71, 7.00) |                   | 1.06 (0.09, 12.46) |                            | 2.33 (0.74, 7.35) |                   |                   | 1.08 (0.09, 12.70) |                   |

\*Time periods collapsed into weeks 0-4 and weeks 5-24.

Supplementary Table 19: Hazard ratios and 95% CIs for individual arterial and venous thrombotic events, and other cardiovascular events, by time since booster vaccination with mRNA-1273 or BNT-162b2 for those on a primary course of BNT-162b2.

| Outcome  | Age and Sex adjusted HR (95% CI) |                   |                   |                   |                   | Fully Adjusted HR (95% CI) |                   |                   |                   |                   |                   |
|----------|----------------------------------|-------------------|-------------------|-------------------|-------------------|----------------------------|-------------------|-------------------|-------------------|-------------------|-------------------|
|          | Week 1                           | Week 2            | Weeks 3-4         | Weeks 5-12        | Weeks 13-24       | Week 1                     | Week 2            | Weeks 3-4         | Weeks 5-12        | Weeks 13-24       |                   |
| Arterial | Composite arterial               | 0.66 (0.62, 0.69) | 0.75 (0.71, 0.79) | 0.75 (0.72, 0.78) | 0.70 (0.68, 0.73) | 0.63 (0.59, 0.66)          | 0.69 (0.65, 0.73) | 0.79 (0.75, 0.83) | 0.80 (0.77, 0.84) | 0.78 (0.75, 0.81) | 0.73 (0.68, 0.77) |
|          | AMI <sup>2</sup>                 | 0.66 (0.62, 0.72) | 0.76 (0.71, 0.82) | 0.79 (0.75, 0.84) | 0.71 (0.68, 0.75) | 0.62 (0.58, 0.68)          | 0.69 (0.64, 0.74) | 0.79 (0.74, 0.85) | 0.83 (0.79, 0.88) | 0.77 (0.73, 0.81) | 0.70 (0.64, 0.76) |
|          | Ischaemic stroke                 | 0.65 (0.61, 0.70) | 0.75 (0.69, 0.80) | 0.71 (0.67, 0.75) | 0.69 (0.66, 0.73) | 0.65 (0.60, 0.70)          | 0.69 (0.64, 0.74) | 0.80 (0.74, 0.85) | 0.77 (0.73, 0.82) | 0.79 (0.75, 0.83) | 0.77 (0.71, 0.84) |
| Venous   | Composite venous                 | 0.62 (0.56, 0.70) | 0.65 (0.58, 0.73) | 0.64 (0.58, 0.69) | 0.61 (0.56, 0.65) | 0.54 (0.48, 0.61)          | 0.63 (0.56, 0.70) | 0.66 (0.59, 0.73) | 0.64 (0.59, 0.70) | 0.61 (0.57, 0.66) | 0.56 (0.49, 0.63) |
|          | Lower limb DVT <sup>7</sup>      | 0.72 (0.60, 0.86) | 0.75 (0.63, 0.89) | 0.66 (0.58, 0.76) | 0.64 (0.57, 0.72) | 0.57 (0.47, 0.69)          | 0.72 (0.61, 0.86) | 0.75 (0.63, 0.89) | 0.66 (0.58, 0.76) | 0.64 (0.57, 0.72) | 0.59 (0.48, 0.72) |
|          | Pulmonary embolism               | 0.56 (0.48, 0.65) | 0.59 (0.51, 0.69) | 0.63 (0.56, 0.70) | 0.59 (0.53, 0.65) | 0.53 (0.46, 0.62)          | 0.56 (0.48, 0.65) | 0.60 (0.51, 0.69) | 0.63 (0.56, 0.71) | 0.59 (0.54, 0.65) | 0.54 (0.46, 0.64) |
|          | ICVT <sup>8*</sup>               | 0.43 (0.10, 1.81) | 0.65 (0.20, 2.14) | 0.63 (0.26, 1.55) | 0.78 (0.42, 1.47) | 0.93 (0.35, 2.47)          | 0.39 (0.09, 1.63) | 0.61 (0.19, 1.98) | 0.61 (0.25, 1.48) | 0.69 (0.37, 1.29) | 0.81 (0.30, 2.20) |
|          | Mesenteric thrombus              | 0.46 (0.32, 0.68) | 0.51 (0.36, 0.73) | 0.64 (0.50, 0.82) | 0.54 (0.43, 0.68) | 0.42 (0.29, 0.61)          | 0.47 (0.32, 0.70) | 0.53 (0.37, 0.76) | 0.66 (0.51, 0.85) | 0.57 (0.45, 0.72) | 0.45 (0.31, 0.66) |
|          | Portal vein thrombosis           |                   | 0.28 (0.11, 0.74) |                   | 0.51 (0.23, 1.12) |                            | 0.24 (0.08, 0.68) |                   | 0.40 (0.17, 0.94) |                   |                   |
| Other    | Any thrombocytopenia             | 0.90 (0.63, 1.29) | 0.65 (0.42, 1.01) | 1.08 (0.82, 1.43) | 0.85 (0.66, 1.09) | 1.28 (0.85, 1.92)          | 0.84 (0.58, 1.20) | 0.59 (0.38, 0.92) | 0.97 (0.73, 1.27) | 0.71 (0.55, 0.91) | 1.02 (0.68, 1.54) |
|          | SAH and HS <sup>9</sup>          | 0.73 (0.59, 0.89) | 0.82 (0.67, 1.00) | 0.87 (0.75, 1.01) | 0.75 (0.65, 0.86) | 0.66 (0.52, 0.84)          | 0.75 (0.61, 0.92) | 0.85 (0.70, 1.04) | 0.91 (0.78, 1.07) | 0.81 (0.70, 0.93) | 0.73 (0.58, 0.92) |
|          | Myocarditis                      | 1.87 (1.10, 3.18) | 0.99 (0.48, 2.04) | 1.07 (0.59, 1.94) | 0.88 (0.53, 1.48) | 0.37 (0.08, 1.64)          | 1.83 (1.07, 3.11) | 0.96 (0.46, 1.98) | 1.05 (0.58, 1.91) | 0.85 (0.51, 1.43) | 0.36 (0.08, 1.59) |
|          | Pericarditis                     | 0.88 (0.35, 2.18) | 2.13 (1.09, 4.16) | 1.29 (0.68, 2.43) | 1.31 (0.78, 2.21) | 1.45 (0.47, 4.51)          | 0.87 (0.35, 2.17) | 2.14 (1.10, 4.17) | 1.29 (0.68, 2.43) | 1.33 (0.79, 2.24) | 1.50 (0.48, 4.69) |

\*Time periods collapsed into weeks 0-4 and weeks 5-24.

Supplementary Table 20: Hazard ratios and 95% CIs for individual arterial and venous thrombotic events, and other cardiovascular events, by time since booster vaccination with mRNA-1273 for those on a primary course of mRNA-1273 or BNT-162b2.

| Outcome         |                               | Age and Sex adjusted HR (95% CI) |                   |                   |                    |                   | Fully Adjusted HR (95% CI) |                   |                   |                    |                   |
|-----------------|-------------------------------|----------------------------------|-------------------|-------------------|--------------------|-------------------|----------------------------|-------------------|-------------------|--------------------|-------------------|
|                 |                               | Week 1                           | Week 2            | Weeks 3-4         | Weeks 5-12         | Weeks 13-24       | Week 1                     | Week 2            | Weeks 3-4         | Weeks 5-12         | Weeks 13-24       |
| <b>Arterial</b> | Composite arterial            | 0.63 (0.51, 0.77)                | 0.92 (0.78, 1.10) | 0.82 (0.71, 0.94) | 0.79 (0.70, 0.89)  | 0.96 (0.30, 3.04) | 0.66 (0.54, 0.81)          | 0.98 (0.83, 1.17) | 0.88 (0.76, 1.01) | 0.86 (0.76, 0.97)  | 1.04 (0.32, 3.38) |
|                 | AMI <sup>2</sup> *            | 0.84 (0.73, 0.96)                |                   | 0.81 (0.69, 0.95) |                    |                   | 0.89 (0.78, 1.02)          |                   | 0.86 (0.73, 1.02) |                    |                   |
|                 | Ischaemic stroke              | 0.46 (0.33, 0.64)                | 0.92 (0.72, 1.18) | 0.77 (0.63, 0.94) | 0.73 (0.61, 0.87)  | NA (NA, NA)       | 0.49 (0.35, 0.68)          | 0.98 (0.77, 1.26) | 0.83 (0.68, 1.02) | 0.81 (0.67, 0.97)  | 1.80 (0.53, 6.14) |
| <b>Venous</b>   | Composite venous*             | 0.62 (0.51, 0.76)                |                   |                   | 0.60 (0.47, 0.76)  |                   | 0.61 (0.50, 0.75)          |                   |                   | 0.58 (0.45, 0.74)  |                   |
|                 | Lower limb DVT <sup>7</sup> * | 0.53 (0.38, 0.73)                |                   |                   | 0.52 (0.34, 0.78)  |                   | 0.53 (0.38, 0.73)          |                   |                   | 0.51 (0.34, 0.76)  |                   |
|                 | Pulmonary embolism*           | 0.67 (0.52, 0.88)                |                   |                   | 0.67 (0.49, 0.92)  |                   | 0.70 (0.53, 0.91)          |                   |                   | 0.70 (0.51, 0.96)  |                   |
|                 | ICVT <sup>8</sup> *           | 0.28 (0.04, 2.05)                |                   |                   | 0.36 (0.05, 2.81)  |                   | 0.26 (0.04, 1.79)          |                   |                   | 0.27 (0.04, 1.94)  |                   |
|                 | Mesenteric thrombus*          | 0.66 (0.34, 1.28)                |                   |                   | 0.67 (0.32, 1.43)  |                   | 0.68 (0.35, 1.32)          |                   |                   | 0.68 (0.31, 1.46)  |                   |
|                 | Portal vein thrombosis*       | 0.59 (0.08, 4.67)                |                   |                   | 0.66 (0.08, 5.28)  |                   | 0.58 (0.07, 4.65)          |                   |                   | 0.64 (0.08, 5.08)  |                   |
| <b>Other</b>    | Any thrombocytopenia*         | 1.11 (0.64, 1.95)                |                   |                   | 0.14 (0.02, 1.02)  |                   | 1.05 (0.59, 1.85)          |                   |                   | 0.12 (0.02, 0.90)  |                   |
|                 | SAH and HS <sup>9</sup> *     | 0.67 (0.44, 1.03)                |                   |                   | 0.65 (0.36, 1.16)  |                   | 0.72 (0.47, 1.11)          |                   |                   | 0.71 (0.40, 1.27)  |                   |
|                 | Myocarditis*                  | 0.94 (0.40, 2.19)                |                   |                   | 0.47 (0.06, 3.61)  |                   | 0.90 (0.39, 2.11)          |                   |                   | 0.46 (0.06, 3.50)  |                   |
|                 | Pericarditis*                 | 2.02 (0.68, 6.03)                |                   |                   | 0.98 (0.10, 10.16) |                   | 2.04 (0.68, 6.07)          |                   |                   | 1.00 (0.10, 10.31) |                   |

\*Time periods collapsed into weeks 0-4 and weeks 5-24.

Supplementary Table 21: Hazard ratios and 95% CIs for individual arterial and venous thrombotic events, and other cardiovascular events, by time since booster vaccination with BNT-162b2 for those on a primary course of mRNA-1273 or BNT-162b2.

| Outcome         |                             | Age and Sex adjusted HR (95% CI) |                  |                   |                  |                  | Fully Adjusted HR (95% CI) |                  |                  |                  |                  |
|-----------------|-----------------------------|----------------------------------|------------------|-------------------|------------------|------------------|----------------------------|------------------|------------------|------------------|------------------|
|                 |                             | Week 1                           | Week 2           | Weeks 3-4         | Weeks 5-12       | Weeks 13-24      | Week 1                     | Week 2           | Weeks 3-4        | Weeks 5-12       | Weeks 13-24      |
| <b>Arterial</b> | Composite arterial          | 0.66 (0.63,0.70)                 | 0.75 (0.71,0.79) | 0.76 (0.73, 0.79) | 0.71 (0.69,0.74) | 0.64 (0.60,0.68) | 0.70 (0.66,0.74)           | 0.79 (0.75,0.84) | 0.81 (0.78,0.85) | 0.80 (0.77,0.83) | 0.75 (0.70,0.79) |
|                 | AMI <sup>2</sup>            | 0.66 (0.61,0.72)                 | 0.76 (0.71,0.82) | 0.80 (0.76,0.85)  | 0.73 (0.69,0.77) | 0.63 (0.59,0.69) | 0.69 (0.64,0.74)           | 0.80 (0.74,0.86) | 0.85 (0.80,0.90) | 0.79 (0.75,0.83) | 0.71 (0.65,0.77) |
|                 | Ischaemic stroke            | 0.67 (0.62,0.72)                 | 0.74 (0.69,0.79) | 0.71 (0.67,0.75)  | 0.70 (0.67,0.74) | 0.65 (0.60,0.71) | 0.71 (0.65,0.76)           | 0.79 (0.73,0.85) | 0.77 (0.73,0.82) | 0.80 (0.75,0.84) | 0.77 (0.71,0.84) |
| <b>Venous</b>   | Composite venous            | 0.63 (0.56,0.71)                 | 0.67 (0.60,0.75) | 0.65 (0.59,0.71)  | 0.61 (0.57,0.66) | 0.55 (0.49,0.62) | 0.63 (0.56,0.71)           | 0.67 (0.59,0.75) | 0.64 (0.59,0.70) | 0.61 (0.57,0.66) | 0.56 (0.49,0.63) |
|                 | Lower limb DVT <sup>7</sup> | 0.72 (0.60,0.86)                 | 0.78 (0.65,0.93) | 0.68 (0.59,0.79)  | 0.65 (0.58,0.73) | 0.57 (0.46,0.69) | 0.72 (0.60,0.86)           | 0.78 (0.65,0.93) | 0.68 (0.59,0.79) | 0.65 (0.58,0.73) | 0.58 (0.48,0.71) |
|                 | Pulmonary embolism          | 0.57 (0.49,0.67)                 | 0.60 (0.52,0.70) | 0.63 (0.56,0.71)  | 0.59 (0.54,0.65) | 0.55 (0.47,0.65) | 0.58 (0.49,0.67)           | 0.61 (0.52,0.71) | 0.64 (0.57,0.71) | 0.60 (0.54,0.66) | 0.56 (0.48,0.66) |
|                 | ICVT <sup>8</sup>           | 0.50 (0.12,2.09)                 | 0.52 (0.12,2.16) | 0.69 (0.29,1.67)  | 0.75 (0.41,1.38) | 0.85 (0.34,2.17) | 0.53 (0.13,2.19)           | 0.51 (0.12,2.15) | 0.70 (0.29,1.68) | 0.72 (0.39,1.34) | 0.88 (0.34,2.26) |
|                 | Mesenteric thrombus         | 0.48 (0.33,0.71)                 | 0.45 (0.31,0.67) | 0.67 (0.52,0.87)  | 0.56 (0.45,0.70) | 0.43 (0.29,0.63) | 0.49 (0.33,0.72)           | 0.46 (0.31,0.69) | 0.69 (0.53,0.89) | 0.58 (0.46,0.73) | 0.45 (0.31,0.67) |
|                 | Portal vein thrombosis*     | 0.23 (0.08,0.68)                 |                  |                   | 0.45 (0.20,1.00) |                  |                            | 0.21 (0.07,0.69) |                  |                  | 0.38 (0.17,0.87) |
| <b>Other</b>    | Any thrombocytopenia        | 0.87 (0.59,1.28)                 | 0.57 (0.35,0.93) | 1.16 (0.87,1.53)  | 0.91 (0.71,1.17) | 1.31 (0.87,1.98) | 0.77 (0.52,1.13)           | 0.50 (0.30,0.81) | 1.00 (0.75,1.32) | 0.74 (0.57,0.95) | 1.05 (0.69,1.59) |
|                 | SAH and HS <sup>9</sup>     | 0.72 (0.58,0.88)                 | 0.84 (0.69,1.02) | 0.85 (0.73,1.00)  | 0.73 (0.64,0.85) | 0.63 (0.50,0.80) | 0.74 (0.60,0.92)           | 0.88 (0.72,1.07) | 0.90 (0.77,1.05) | 0.80 (0.69,0.92) | 0.71 (0.56,0.90) |
|                 | Myocarditis                 | 1.88 (1.03,3.44)                 | 1.06 (0.49,2.30) | 1.32 (0.73,2.39)  | 1.04 (0.62,1.73) | 0.43 (0.10,1.92) | 1.93 (1.06,3.53)           | 1.11 (0.51,2.40) | 1.38 (0.76,2.48) | 1.06 (0.63,1.78) | 0.45 (0.10,1.99) |
|                 | Pericarditis                | 0.98 (0.39,2.44)                 | 1.92 (0.94,3.93) | 1.14 (0.58,2.24)  | 1.32 (0.79,2.20) | 1.39 (0.45,4.32) | 0.96 (0.38,2.39)           | 1.83 (0.90,3.75) | 1.10 (0.56,2.18) | 1.28 (0.76,2.15) | 1.33 (0.43,4.14) |

\*Time periods collapsed into weeks 0-4 and weeks 5-24.

Supplementary Table 22: Hazard ratios and 95% CIs for individual arterial and venous thrombotic events, and other cardiovascular events, by time since booster vaccination with mRNA-1273 or BNT-162b2 for those on a primary course of mRNA-1273 or BNT-162b2.

| Outcome         |                             | Age and Sex adjusted HR (95% CI) |                  |                  |                  |                  | Fully Adjusted HR (95% CI) |                  |                  |                  |                  |                  |
|-----------------|-----------------------------|----------------------------------|------------------|------------------|------------------|------------------|----------------------------|------------------|------------------|------------------|------------------|------------------|
|                 |                             | Week 1                           | Week 2           | Weeks 3-4        | Weeks 5-12       | Weeks 13-24      | Week 1                     | Week 2           | Weeks 3-4        | Weeks 5-12       | Weeks 13-24      |                  |
| <b>Arterial</b> | Composite arterial          | 0.66 (0.63,0.70)                 | 0.76 (0.72,0.80) | 0.76 (0.73,0.79) | 0.71 (0.69,0.74) | 0.64 (0.60,0.67) | 0.69 (0.66,0.73)           | 0.80 (0.76,0.84) | 0.81 (0.78,0.84) | 0.79 (0.76,0.81) | 0.73 (0.69,0.77) |                  |
|                 | AMI <sup>2</sup>            | 0.67 (0.62,0.72)                 | 0.77 (0.72,0.83) | 0.80 (0.76,0.85) | 0.72 (0.69,0.76) | 0.63 (0.58,0.68) | 0.70 (0.65,0.75)           | 0.81 (0.75,0.87) | 0.85 (0.81,0.90) | 0.80 (0.76,0.84) | 0.71 (0.66,0.77) |                  |
|                 | Ischaemic stroke            | 0.66 (0.61,0.71)                 | 0.75 (0.70,0.81) | 0.72 (0.68,0.76) | 0.70 (0.67,0.74) | 0.65 (0.60,0.71) | 0.70 (0.65,0.75)           | 0.80 (0.75,0.86) | 0.78 (0.74,0.83) | 0.80 (0.76,0.84) | 0.78 (0.72,0.84) |                  |
| <b>Venous</b>   | Composite venous            | 0.63 (0.56,0.71)                 | 0.66 (0.59,0.74) | 0.64 (0.59,0.70) | 0.62 (0.57,0.66) | 0.55 (0.49,0.63) | 0.63 (0.56,0.71)           | 0.66 (0.59,0.74) | 0.64 (0.59,0.70) | 0.62 (0.57,0.67) | 0.57 (0.50,0.64) |                  |
|                 | Lower limb DVT <sup>7</sup> | 0.72 (0.60,0.86)                 | 0.76 (0.64,0.90) | 0.67 (0.58,0.76) | 0.65 (0.58,0.73) | 0.57 (0.47,0.70) | 0.72 (0.60,0.85)           | 0.76 (0.64,0.90) | 0.66 (0.58,0.76) | 0.65 (0.58,0.73) | 0.58 (0.48,0.71) |                  |
|                 | Pulmonary embolism          | 0.57 (0.49,0.66)                 | 0.60 (0.52,0.69) | 0.63 (0.56,0.70) | 0.59 (0.53,0.64) | 0.53 (0.46,0.62) | 0.56 (0.48,0.66)           | 0.60 (0.52,0.69) | 0.63 (0.56,0.70) | 0.58 (0.53,0.64) | 0.54 (0.46,0.63) |                  |
|                 | ICVT <sup>8</sup>           | 0.39 (0.09,1.64)                 | 0.61 (0.18,2.04) | 0.56 (0.23,1.37) | 0.71 (0.39,1.31) | 0.88 (0.34,2.28) | 0.42 (0.10,1.76)           | 0.61 (0.19,2.01) | 0.60 (0.25,1.46) | 0.77 (0.42,1.42) | 0.91 (0.35,2.34) |                  |
|                 | Mesenteric thrombus         | 0.46 (0.32,0.68)                 | 0.51 (0.36,0.74) | 0.65 (0.51,0.84) | 0.56 (0.44,0.70) | 0.43 (0.30,0.63) | 0.48 (0.33,0.71)           | 0.54 (0.37,0.77) | 0.69 (0.54,0.89) | 0.61 (0.48,0.76) | 0.49 (0.33,0.71) |                  |
|                 | Portal vein thrombosis*     | 0.25 (0.10,0.65)                 |                  |                  | 0.44 (0.20,0.94) |                  |                            | 0.25 (0.10,0.66) |                  |                  | 0.39 (0.17,0.88) |                  |
|                 | <b>Other</b>                | Any thrombocytopenia             | 0.93 (0.64,1.34) | 0.67 (0.43,1.04) | 1.14 (0.87,1.51) | 0.91 (0.70,1.16) | 1.39 (0.93,2.09)           | 0.85 (0.59,1.22) | 0.60 (0.39,0.93) | 1.02 (0.77,1.35) | 0.76 (0.59,0.97) | 1.10 (0.73,1.66) |
|                 | SAH and HS <sup>9</sup>     | 0.72 (0.58,0.88)                 | 0.81 (0.67,0.99) | 0.86 (0.74,1.00) | 0.74 (0.64,0.86) | 0.66 (0.52,0.83) | 0.75 (0.61,0.93)           | 0.85 (0.70,1.04) | 0.92 (0.79,1.07) | 0.82 (0.71,0.95) | 0.75 (0.60,0.96) |                  |
|                 | Myocarditis                 | 1.96 (1.18,3.25)                 | 0.98 (0.47,2.04) | 1.12 (0.62,2.01) | 0.98 (0.59,1.62) | 0.45 (0.10,1.97) | 1.93 (1.16,3.21)           | 0.96 (0.46,2.00) | 1.07 (0.59,1.96) | 0.95 (0.57,1.58) | 0.41 (0.09,1.80) |                  |
|                 | Pericarditis                | 0.85 (0.34,2.10)                 | 2.04 (1.06,3.94) | 1.23 (0.66,2.32) | 1.29 (0.78,2.15) | 1.50 (0.49,4.61) | 0.88 (0.35,2.20)           | 2.05 (1.07,3.93) | 1.29 (0.69,2.42) | 1.37 (0.82,2.28) | 1.68 (0.54,5.21) |                  |

\*Time periods collapsed into weeks 0-4 and weeks 5-24.

Supplementary Table 23: Hazard ratios and 95% CIs for individual arterial and venous thrombotic events, and other cardiovascular events, by time since booster vaccination with mRNA-1273 for those on a primary course of ChAdOx1 or mRNA-1273 or BNT-162b2.

| Outcome         | Age and Sex adjusted HR (95% CI) |                  |                  |                  |                  | Fully Adjusted HR (95% CI) |                   |                   |                   |                   |                   |
|-----------------|----------------------------------|------------------|------------------|------------------|------------------|----------------------------|-------------------|-------------------|-------------------|-------------------|-------------------|
|                 | Week 1                           | Week 2           | Weeks 3-4        | Weeks 5-12       | Weeks 13-24      | Week 1                     | Week 2            | Weeks 3-4         | Weeks 5-12        | Weeks 13-24       |                   |
| <b>Arterial</b> | Composite arterial               | 0.65 (0.59,0.71) | 0.72 (0.66,0.79) | 0.67 (0.62,0.72) | 0.59 (0.56,0.64) | 0.43 (0.14,1.35)           | 0.75 (0.68, 0.82) | 0.84 (0.77, 0.92) | 0.79 (0.74, 0.85) | 0.73 (0.68, 0.78) | 0.55 (0.18, 1.74) |
|                 | AMI <sup>2</sup> *               | 0.71 (0.66,0.76) |                  | 0.64 (0.59,0.70) |                  | 0.82 (0.76, 0.88)          |                   | 0.75 (0.69, 0.82) |                   |                   |                   |
|                 | Ischaemic stroke                 | 0.61 (0.53,0.70) | 0.73 (0.64,0.84) | 0.58 (0.52,0.65) | 0.52 (0.47,0.57) | 0.82 (0.26,2.59)           | 0.71 (0.61, 0.82) | 0.86 (0.75, 0.99) | 0.69 (0.62, 0.78) | 0.65 (0.58, 0.72) | 0.88 (0.27, 2.90) |
| <b>Venous</b>   | Composite venous*                | 0.57 (0.52,0.64) |                  | 0.54 (0.48,0.62) |                  | 0.61 (0.55, 0.68)          |                   | 0.58 (0.51, 0.66) |                   |                   |                   |
|                 | Lower limb DVT <sup>7</sup> *    | 0.59 (0.51,0.70) |                  | 0.55 (0.45,0.68) |                  | 0.62 (0.53, 0.73)          |                   | 0.59 (0.48, 0.72) |                   |                   |                   |
|                 | Pulmonary embolism*              | 0.54 (0.47,0.62) |                  | 0.54 (0.46,0.65) |                  | 0.58 (0.50, 0.67)          |                   | 0.59 (0.49, 0.70) |                   |                   |                   |
|                 | ICVT <sup>8</sup> *              | 0.72 (0.30,1.68) |                  | 0.69 (0.27,1.78) |                  | 0.74 (0.32, 1.75)          |                   | 0.70 (0.27, 1.80) |                   |                   |                   |
|                 | Mesenteric thrombus*             | 0.48 (0.33,0.71) |                  | 0.44 (0.27,0.71) |                  | 0.54 (0.36, 0.79)          |                   | 0.50 (0.31, 0.81) |                   |                   |                   |
|                 | Portal vein thrombosis           | 0.76 (0.34,1.71) |                  | 0.09 (0.01,0.76) |                  | 0.90 (0.40, 2.02)          |                   | 0.10 (0.01, 0.79) |                   |                   |                   |
| <b>Other</b>    | Any thrombocytopenia*            | 0.87 (0.61,1.25) |                  | 0.44 (0.23,0.82) |                  | 0.93 (0.65, 1.32)          |                   | 0.45 (0.24, 0.84) |                   |                   |                   |
|                 | SAH and HS <sup>9</sup>          | 0.40 (0.25,0.65) | 0.49 (0.31,0.76) | 0.63 (0.46,0.86) | 0.56 (0.42,0.76) | NA (NA, NA)                | 0.45 (0.28, 0.73) | 0.55 (0.36, 0.87) | 0.74 (0.54, 1.00) | 0.68 (0.51, 0.92) | 4.55 (0.59,35.00) |
|                 | Myocarditis*                     | 0.84 (0.48,1.47) |                  | 0.75 (0.30,1.88) |                  | 0.86 (0.49, 1.51)          |                   | 0.74 (0.29, 1.84) |                   |                   |                   |
|                 | Pericarditis*                    | 0.97 (0.48,1.93) |                  | 0.30 (0.06,1.42) |                  | 1.01 (0.51, 2.02)          |                   | 0.32 (0.07, 1.52) |                   |                   |                   |

\*Time periods collapsed into weeks 0-4 and weeks 5-24.  
NA (NA-NA) Could not obtain estimate for this time interval



Supplementary Table 24: Hazard ratios and 95% CIs for individual arterial and venous thrombotic events, and other cardiovascular events, by time since booster vaccination with BNT-162b2 for those on a primary course of ChAdOx1 or mRNA-1273 or BNT-162b2.

| Outcome         |                             | Age and Sex adjusted HR (95% CI) |                  |                  |                  |                  | Fully Adjusted HR (95% CI) |                  |                  |                  |                  |
|-----------------|-----------------------------|----------------------------------|------------------|------------------|------------------|------------------|----------------------------|------------------|------------------|------------------|------------------|
|                 |                             | Week 1                           | Week 2           | Weeks 3-4        | Weeks 5-12       | Weeks 13-24      | Week 1                     | Week 2           | Weeks 3-4        | Weeks 5-12       | Weeks 13-24      |
| <b>Arterial</b> | Composite arterial          | 0.73 (0.70,0.75)                 | 0.79 (0.76,0.81) | 0.79 (0.77,0.81) | 0.74 (0.72,0.76) | 0.65 (0.63,0.68) | 0.75 (0.72,0.78)           | 0.82 (0.79,0.85) | 0.83 (0.81,0.86) | 0.80 (0.78,0.82) | 0.75 (0.72,0.78) |
|                 | AMI <sup>2</sup>            | 0.73 (0.69,0.77)                 | 0.81 (0.77,0.85) | 0.82 (0.79,0.85) | 0.75 (0.73,0.78) | 0.66 (0.62,0.70) | 0.74 (0.70,0.77)           | 0.82 (0.78,0.86) | 0.83 (0.80,0.87) | 0.78 (0.76,0.81) | 0.71 (0.67,0.75) |
|                 | Ischaemic stroke            | 0.73 (0.69,0.77)                 | 0.77 (0.73,0.81) | 0.77 (0.74,0.80) | 0.73 (0.70,0.75) | 0.66 (0.62,0.70) | 0.77 (0.73,0.81)           | 0.82 (0.78,0.86) | 0.83 (0.80,0.87) | 0.84 (0.81,0.87) | 0.82 (0.77,0.87) |
| <b>Venous</b>   | Composite venous            | 0.67 (0.62,0.73)                 | 0.73 (0.68,0.79) | 0.72 (0.68,0.76) | 0.66 (0.63,0.69) | 0.60 (0.54,0.66) | 0.66 (0.61,0.72)           | 0.72 (0.67,0.78) | 0.71 (0.67,0.75) | 0.65 (0.62,0.68) | 0.60 (0.54,0.66) |
|                 | Lower limb DVT <sup>7</sup> | 0.73 (0.65,0.83)                 | 0.86 (0.77,0.96) | 0.79 (0.72,0.86) | 0.70 (0.65,0.76) | 0.67 (0.57,0.77) | 0.72 (0.64,0.82)           | 0.85 (0.76,0.96) | 0.78 (0.71,0.86) | 0.70 (0.64,0.75) | 0.67 (0.58,0.78) |
|                 | Pulmonary embolism          | 0.63 (0.57,0.70)                 | 0.66 (0.59,0.73) | 0.67 (0.62,0.73) | 0.63 (0.59,0.67) | 0.56 (0.49,0.63) | 0.62 (0.56,0.69)           | 0.65 (0.59,0.72) | 0.66 (0.61,0.72) | 0.62 (0.58,0.66) | 0.55 (0.49,0.62) |
|                 | ICVT <sup>8</sup>           | 0.49 (0.18,1.35)                 | 0.78 (0.34,1.77) | 0.75 (0.40,1.42) | 0.83 (0.51,1.33) | 0.89 (0.37,2.17) | 0.47 (0.17,1.29)           | 0.73 (0.32,1.65) | 0.68 (0.36,1.29) | 0.71 (0.43,1.15) | 0.72 (0.29,1.75) |
|                 | Mesenteric thrombus         | 0.52 (0.40,0.68)                 | 0.54 (0.42,0.71) | 0.63 (0.52,0.76) | 0.63 (0.54,0.74) | 0.56 (0.42,0.74) | 0.52 (0.40,0.68)           | 0.55 (0.42,0.71) | 0.64 (0.53,0.77) | 0.65 (0.55,0.76) | 0.60 (0.45,0.79) |
|                 | Portal vein thrombosis      | 0.57 (0.23,1.40)                 | 0.12 (0.02,0.86) | 0.39 (0.17,0.87) | 0.57 (0.33,0.97) | 0.29 (0.08,1.06) | 0.57 (0.22,1.47)           | 0.10 (0.01,0.76) | 0.39 (0.17,0.92) | 0.62 (0.34,1.14) | 0.37 (0.09,1.52) |
| <b>Other</b>    | Any thrombocytopenia        | 1.16 (0.91,1.49)                 | 0.98 (0.74,1.28) | 1.30 (1.07,1.58) | 1.18 (0.99,1.41) | 2.00 (1.46,2.75) | 0.99 (0.78,1.27)           | 0.82 (0.62,1.07) | 1.06 (0.87,1.28) | 0.88 (0.74,1.05) | 1.40 (1.02,1.92) |
|                 | SAH and HS <sup>9</sup>     | 0.69 (0.60,0.80)                 | 0.78 (0.68,0.90) | 0.77 (0.69,0.86) | 0.75 (0.68,0.82) | 0.65 (0.55,0.78) | 0.72 (0.62,0.84)           | 0.82 (0.72,0.95) | 0.82 (0.74,0.92) | 0.83 (0.75,0.91) | 0.76 (0.64,0.91) |
|                 | Myocarditis                 | 1.73 (1.12,2.69)                 | 1.10 (0.64,1.89) | 1.18 (0.77,1.79) | 0.94 (0.65,1.36) | 0.42 (0.13,1.39) | 1.65 (1.07,2.57)           | 1.06 (0.62,1.82) | 1.11 (0.73,1.69) | 0.85 (0.59,1.24) | 0.37 (0.11,1.24) |
|                 | Pericarditis                | 0.79 (0.40,1.55)                 | 1.75 (1.07,2.87) | 0.77 (0.45,1.30) | 1.27 (0.88,1.83) | 0.87 (0.34,2.20) | 0.78 (0.40,1.54)           | 1.73 (1.05,2.83) | 0.76 (0.44,1.28) | 1.22 (0.85,1.76) | 0.85 (0.34,2.14) |

Supplementary Table 25: Hazard ratios and 95% CIs for individual arterial and venous thrombotic events, and other cardiovascular events, by time since booster vaccination with mRNA-1273 or BNT-162b2 for those on a primary course of ChAdOx1 or mRNA-1273 or BNT-162b2.

| Outcome                             |                             | Age and Sex adjusted HR (95% CI) |                  |                  |                  |                  | Fully Adjusted HR (95% CI) |                  |                  |                  |                  |
|-------------------------------------|-----------------------------|----------------------------------|------------------|------------------|------------------|------------------|----------------------------|------------------|------------------|------------------|------------------|
|                                     |                             | Week 1                           | Week 2           | Weeks 3-4        | Weeks 5-12       | Weeks 13-24      | Week 1                     | Week 2           | Weeks 3-4        | Weeks 5-12       | Weeks 13-24      |
| <b>Arterial thrombotic events</b>   | Composite arterial          | 0.72 (0.69,0.74)                 | 0.78 (0.75,0.81) | 0.78 (0.76,0.80) | 0.73 (0.72,0.75) | 0.66 (0.63,0.69) | 0.75 (0.72,0.77)           | 0.82 (0.79,0.84) | 0.82 (0.80,0.85) | 0.79 (0.77,0.81) | 0.74 (0.71,0.77) |
|                                     | AMI <sup>2</sup>            | 0.72 (0.69,0.76)                 | 0.79 (0.75,0.83) | 0.80 (0.78,0.83) | 0.75 (0.72,0.77) | 0.66 (0.62,0.70) | 0.74 (0.71,0.78)           | 0.82 (0.78,0.85) | 0.83 (0.80,0.86) | 0.78 (0.75,0.80) | 0.70 (0.66,0.74) |
|                                     | Ischaemic stroke            | 0.72 (0.68,0.75)                 | 0.77 (0.73,0.81) | 0.75 (0.73,0.78) | 0.73 (0.70,0.75) | 0.68 (0.64,0.72) | 0.76 (0.73,0.80)           | 0.82 (0.78,0.86) | 0.82 (0.79,0.85) | 0.82 (0.79,0.85) | 0.80 (0.75,0.85) |
| <b>Venous thromboembolic events</b> | Composite venous            | 0.66 (0.61,0.71)                 | 0.73 (0.68,0.78) | 0.70 (0.66,0.74) | 0.67 (0.64,0.70) | 0.61 (0.56,0.67) | 0.66 (0.61,0.71)           | 0.72 (0.67,0.78) | 0.69 (0.66,0.73) | 0.65 (0.62,0.69) | 0.60 (0.55,0.66) |
|                                     | Lower limb DVT <sup>7</sup> | 0.70 (0.63,0.79)                 | 0.84 (0.76,0.94) | 0.77 (0.70,0.84) | 0.70 (0.65,0.76) | 0.68 (0.59,0.79) | 0.70 (0.62,0.79)           | 0.84 (0.75,0.94) | 0.76 (0.70,0.83) | 0.69 (0.64,0.75) | 0.67 (0.58,0.78) |
|                                     | Pulmonary embolism          | 0.62 (0.56,0.68)                 | 0.65 (0.59,0.71) | 0.65 (0.61,0.70) | 0.63 (0.59,0.67) | 0.56 (0.50,0.63) | 0.62 (0.56,0.68)           | 0.65 (0.59,0.71) | 0.65 (0.61,0.70) | 0.62 (0.58,0.66) | 0.56 (0.50,0.63) |
|                                     | ICVT <sup>8</sup>           | 0.59 (0.25,1.35)                 | 0.92 (0.47,1.83) | 0.62 (0.33,1.16) | 0.81 (0.51,1.29) | 0.86 (0.35,2.08) | 0.54 (0.23,1.24)           | 0.84 (0.42,1.66) | 0.55 (0.29,1.02) | 0.66 (0.42,1.06) | 0.68 (0.28,1.67) |
|                                     | Mesenteric thrombus         | 0.50 (0.38,0.65)                 | 0.55 (0.43,0.71) | 0.65 (0.54,0.78) | 0.63 (0.54,0.74) | 0.58 (0.44,0.76) | 0.51 (0.39,0.66)           | 0.56 (0.44,0.73) | 0.67 (0.56,0.80) | 0.65 (0.56,0.77) | 0.62 (0.46,0.82) |
|                                     | Portal vein thrombosis      | 0.55 (0.24,1.27)                 | 0.27 (0.08,0.87) | 0.50 (0.26,0.97) | 0.53 (0.32,0.90) | 0.31 (0.08,1.15) | 0.51 (0.21,1.23)           | 0.27 (0.08,0.88) | 0.47 (0.23,0.93) | 0.43 (0.25,0.73) | 0.24 (0.06,1.01) |
| <b>Other cardiovascular events</b>  | Any thrombocytopenia        | 1.13 (0.89,1.42)                 | 0.98 (0.76,1.27) | 1.29 (1.06,1.55) | 1.19 (1.00,1.41) | 2.21 (1.61,3.03) | 1.01 (0.80,1.28)           | 0.86 (0.67,1.11) | 1.11 (0.92,1.33) | 0.93 (0.78,1.10) | 1.57 (1.15,2.15) |
|                                     | SAH and HS <sup>9</sup>     | 0.66 (0.57,0.76)                 | 0.75 (0.65,0.86) | 0.76 (0.68,0.84) | 0.74 (0.68,0.82) | 0.68 (0.57,0.80) | 0.69 (0.59,0.79)           | 0.79 (0.69,0.90) | 0.80 (0.72,0.89) | 0.81 (0.74,0.89) | 0.77 (0.64,0.91) |
|                                     | Myocarditis                 | 1.71 (1.17,2.50)                 | 1.04 (0.64,1.70) | 0.96 (0.63,1.46) | 0.91 (0.63,1.30) | 0.41 (0.12,1.36) | 1.69 (1.15,2.47)           | 1.05 (0.64,1.71) | 0.95 (0.63,1.45) | 0.87 (0.60,1.24) | 0.40 (0.12,1.34) |
|                                     | Pericarditis                | 0.64 (0.32,1.26)                 | 1.69 (1.05,2.70) | 0.94 (0.60,1.50) | 1.27 (0.88,1.84) | 1.02 (0.40,2.59) | 0.61 (0.31,1.20)           | 1.60 (1.00,2.54) | 0.88 (0.56,1.39) | 1.11 (0.77,1.59) | 0.83 (0.33,2.10) |

Supplementary Table 26: Subgroup-specific maximally-adjusted hazard ratios and 95% CIs for composite arterial and composite venous events by time since first dose vaccination.

| Vaccination course       | Event              | Stratum                           | Week 1           | Week 2           | Weeks 3-4        | Weeks 5-12       | Weeks 13-24      | Weeks 25-26      |
|--------------------------|--------------------|-----------------------------------|------------------|------------------|------------------|------------------|------------------|------------------|
| <b>Dose 1: BNT-162b2</b> | Composite arterial | Age group: <40                    | 0.97 (0.72,1.30) | 0.94 (0.70,1.27) | 0.90 (0.72,1.13) | 1.16 (1.02,1.32) | 1.00 (0.87,1.15) | 0.93 (0.72,1.21) |
|                          |                    | Age group: 40-59                  | 0.87 (0.78,0.99) | 0.99 (0.88,1.11) | 1.00 (0.92,1.09) | 0.91 (0.85,0.96) | 0.94 (0.88,1.00) | 0.99 (0.89,1.10) |
|                          |                    | Age group: 60-79                  | 0.75 (0.70,0.81) | 0.84 (0.79,0.90) | 0.86 (0.81,0.90) | 0.88 (0.84,0.92) | 0.94 (0.90,0.98) | 0.96 (0.90,1.03) |
|                          |                    | Age group: >=80                   | 0.62 (0.58,0.67) | 0.67 (0.62,0.72) | 0.72 (0.68,0.77) | 0.77 (0.73,0.80) | 0.85 (0.81,0.90) | 0.89 (0.82,0.96) |
|                          |                    | Ethnicity: White                  | 0.72 (0.68,0.75) | 0.79 (0.76,0.83) | 0.81 (0.78,0.84) | 0.82 (0.80,0.84) | 0.86 (0.83,0.88) | 0.85 (0.81,0.88) |
|                          |                    | Ethnicity: Black or Black British | 0.51 (0.34,0.78) | 0.71 (0.50,1.02) | 0.95 (0.76,1.20) | 0.92 (0.79,1.07) | 0.84 (0.73,0.97) | 0.83 (0.62,1.10) |
|                          |                    | Ethnicity: Asian or Asian British | 0.79 (0.65,0.96) | 0.97 (0.81,1.16) | 0.99 (0.87,1.13) | 0.99 (0.90,1.08) | 1.07 (0.98,1.17) | 1.25 (1.07,1.47) |
|                          |                    | Ethnicity: Other Ethnic Groups    | 0.79 (0.49,1.27) | 0.54 (0.30,0.95) | 0.92 (0.66,1.28) | 0.96 (0.77,1.21) | 1.14 (0.92,1.42) | 1.14 (0.77,1.68) |
|                          |                    | Ethnicity: Mixed                  | 0.90 (0.51,1.56) | 1.08 (0.63,1.84) | 1.02 (0.68,1.53) | 0.90 (0.69,1.17) | 0.80 (0.61,1.06) | 0.92 (0.56,1.54) |
|                          |                    | Ethnicity: Unknown                | 1.01 (0.63,1.63) | 0.82 (0.47,1.42) | 1.20 (0.86,1.69) | 1.40 (1.12,1.75) | 1.99 (1.59,2.49) | 1.73 (1.17,2.56) |
|                          |                    | No prior history of COVID-19      | 0.73 (0.70,0.77) | 0.82 (0.78,0.86) | 0.84 (0.81,0.87) | 0.86 (0.84,0.88) | 0.91 (0.89,0.94) | 0.92 (0.88,0.96) |
|                          |                    | Prior history of COVID-19         | 0.63 (0.48,0.83) | 0.53 (0.39,0.73) | 0.77 (0.63,0.94) | 0.78 (0.68,0.90) | 0.89 (0.75,1.04) | 0.79 (0.60,1.05) |
|                          |                    | No prior history of event         | 0.70 (0.66,0.75) | 0.80 (0.76,0.86) | 0.86 (0.82,0.90) | 0.89 (0.86,0.92) | 0.94 (0.91,0.97) | 0.97 (0.92,1.02) |
|                          |                    | Prior history of event            | 0.76 (0.71,0.81) | 0.82 (0.77,0.87) | 0.83 (0.79,0.87) | 0.84 (0.81,0.87) | 0.95 (0.92,0.99) | 0.99 (0.93,1.05) |
|                          |                    | Sex: Female                       | 0.68 (0.63,0.73) | 0.74 (0.69,0.80) | 0.79 (0.75,0.83) | 0.82 (0.79,0.85) | 0.83 (0.80,0.87) | 0.83 (0.78,0.89) |
|                          | Sex: Male          | 0.78 (0.73,0.82)                  | 0.87 (0.82,0.92) | 0.89 (0.85,0.93) | 0.91 (0.88,0.94) | 0.99 (0.96,1.02) | 1.01 (0.96,1.06) |                  |
|                          | Composite venous   | Age group: <40                    | 0.66 (0.50,0.88) | 0.85 (0.66,1.09) | 0.75 (0.62,0.91) | 0.70 (0.62,0.78) | 0.65 (0.58,0.72) | 0.53 (0.42,0.66) |
|                          |                    | Age group: 40-59                  | 0.77 (0.60,0.97) | 0.94 (0.76,1.17) | 0.91 (0.77,1.07) | 0.92 (0.84,1.02) | 0.92 (0.84,1.01) | 0.84 (0.70,1.02) |
|                          |                    | Age group: 60-79                  | 0.66 (0.57,0.78) | 0.74 (0.64,0.86) | 0.62 (0.55,0.70) | 0.68 (0.63,0.75) | 0.90 (0.82,0.98) | 0.87 (0.75,1.01) |
|                          |                    | Age group: >=80                   | 0.50 (0.41,0.61) | 0.58 (0.48,0.71) | 0.62 (0.54,0.72) | 0.61 (0.54,0.69) | 0.84 (0.75,0.95) | 0.92 (0.77,1.11) |
|                          |                    | Ethnicity: White                  | 0.65 (0.59,0.72) | 0.76 (0.69,0.84) | 0.73 (0.68,0.79) | 0.76 (0.73,0.80) | 0.80 (0.77,0.84) | 0.75 (0.69,0.82) |
|                          |                    | Ethnicity: Black or Black British | 0.89 (0.49,1.63) | 1.13 (0.66,1.93) | 0.77 (0.48,1.22) | 0.92 (0.72,1.17) | 0.95 (0.77,1.18) | 0.89 (0.56,1.41) |
|                          |                    | Ethnicity: Asian or Asian British | 0.51 (0.25,1.04) | 1.02 (0.60,1.73) | 1.18 (0.83,1.69) | 0.96 (0.76,1.21) | 1.07 (0.86,1.34) | 0.56 (0.31,0.98) |
|                          |                    | Ethnicity: Other Ethnic Groups    | 1.03 (0.40,2.64) | 1.42 (0.63,3.18) | 0.59 (0.24,1.47) | 0.89 (0.57,1.39) | 1.08 (0.74,1.57) | 1.10 (0.51,2.38) |
|                          |                    | Ethnicity: Mixed                  | 0.63 (0.20,1.99) | 0.88 (0.32,2.44) | 0.68 (0.30,1.57) | 0.62 (0.39,0.99) | 0.61 (0.39,0.93) | 0.55 (0.23,1.32) |
|                          |                    | Ethnicity: Unknown                | 0.98 (0.35,2.71) | 0.55 (0.13,2.29) | 1.30 (0.64,2.64) | 1.42 (0.92,2.17) | 1.80 (1.21,2.69) | 1.48 (0.61,3.56) |
|                          |                    | No prior history of COVID-19      | 0.68 (0.62,0.76) | 0.80 (0.73,0.88) | 0.76 (0.71,0.82) | 0.80 (0.77,0.84) | 0.86 (0.82,0.90) | 0.79 (0.73,0.86) |
|                          |                    | Prior history of COVID-19         | 0.32 (0.15,0.68) | 0.63 (0.36,1.10) | 0.80 (0.55,1.17) | 0.66 (0.51,0.86) | 0.72 (0.55,0.95) | 0.62 (0.36,1.07) |
|                          |                    | No prior history of event         | 0.66 (0.59,0.73) | 0.80 (0.73,0.89) | 0.76 (0.70,0.81) | 0.78 (0.74,0.82) | 0.84 (0.81,0.88) | 0.75 (0.69,0.82) |
|                          |                    | Prior history of event            | 0.68 (0.53,0.88) | 0.69 (0.53,0.89) | 0.71 (0.59,0.85) | 0.77 (0.69,0.86) | 0.77 (0.69,0.86) | 0.87 (0.72,1.06) |
| Sex: Female              |                    | 0.71 (0.62,0.81)                  | 0.73 (0.64,0.84) | 0.73 (0.66,0.81) | 0.78 (0.74,0.83) | 0.82 (0.77,0.87) | 0.76 (0.68,0.84) |                  |
| Sex: Male                | 0.63 (0.54,0.74)   | 0.88 (0.77,1.01)                  | 0.81 (0.73,0.89) | 0.82 (0.77,0.88) | 0.90 (0.84,0.96) | 0.82 (0.73,0.92) |                  |                  |
| <b>Dose 1: ChAdOx1</b>   | Composite arterial | Age group: <40                    | 0.97 (0.67,1.39) | 1.11 (0.79,1.57) | 1.10 (0.84,1.42) | 1.24 (1.05,1.48) | 0.99 (0.83,1.18) | 1.08 (0.80,1.45) |
|                          |                    | Age group: 40-59                  | 0.82 (0.76,0.89) | 1.04 (0.96,1.12) | 1.03 (0.97,1.09) | 0.98 (0.93,1.02) | 1.00 (0.95,1.05) | 1.01 (0.93,1.08) |
|                          |                    | Age group: 60-79                  | 0.82 (0.77,0.86) | 0.90 (0.86,0.96) | 0.91 (0.87,0.95) | 0.94 (0.91,0.98) | 0.97 (0.94,1.01) | 1.00 (0.95,1.06) |
|                          |                    | Age group: >=80                   | 0.73 (0.67,0.80) | 0.83 (0.76,0.91) | 0.85 (0.79,0.92) | 0.90 (0.85,0.95) | 0.97 (0.91,1.03) | 0.95 (0.87,1.04) |
|                          |                    | Ethnicity: White                  | 0.81 (0.77,0.84) | 0.94 (0.90,0.98) | 0.93 (0.90,0.96) | 0.94 (0.92,0.97) | 0.94 (0.91,0.96) | 0.92 (0.89,0.96) |
|                          |                    | Ethnicity: Black or Black British | 0.98 (0.76,1.27) | 1.13 (0.89,1.45) | 0.99 (0.81,1.20) | 1.08 (0.95,1.22) | 0.93 (0.82,1.06) | 0.82 (0.65,1.04) |
|                          |                    | Ethnicity: Asian or Asian British | 0.99 (0.84,1.16) | 1.09 (0.93,1.27) | 1.23 (1.09,1.38) | 1.24 (1.14,1.35) | 1.27 (1.16,1.39) | 1.19 (1.03,1.37) |
|                          |                    | Ethnicity: Other Ethnic Groups    | 1.21 (0.85,1.70) | 1.17 (0.82,1.67) | 1.06 (0.80,1.41) | 1.22 (1.01,1.47) | 1.16 (0.95,1.41) | 1.31 (0.95,1.80) |
|                          |                    | Ethnicity: Mixed                  | 0.93 (0.58,1.51) | 0.96 (0.59,1.56) | 1.00 (0.70,1.45) | 1.00 (0.78,1.27) | 1.25 (0.98,1.59) | 1.38 (0.92,2.09) |
|                          |                    | Ethnicity: Unknown                | 1.10 (0.74,1.64) | 0.95 (0.62,1.45) | 1.94 (1.51,2.49) | 1.94 (1.62,2.33) | 1.99 (1.65,2.40) | 2.49 (1.86,3.33) |
|                          |                    | No prior history of COVID-19      | 0.83 (0.80,0.86) | 0.97 (0.93,1.01) | 0.97 (0.94,1.00) | 1.00 (0.98,1.02) | 1.00 (0.97,1.02) | 0.99 (0.95,1.03) |
|                          |                    | Prior history of COVID-19         | 0.93 (0.78,1.13) | 0.83 (0.68,1.02) | 0.87 (0.74,1.02) | 0.83 (0.73,0.95) | 0.82 (0.70,0.95) | 0.87 (0.69,1.10) |
|                          |                    | No prior history of event         | 0.85 (0.81,0.90) | 1.04 (0.99,1.10) | 1.05 (1.01,1.09) | 1.04 (1.01,1.07) | 1.04 (1.01,1.07) | 1.03 (0.99,1.08) |
|                          |                    | Prior history of event            | 0.81 (0.76,0.86) | 0.87 (0.82,0.92) | 0.86 (0.82,0.90) | 0.93 (0.90,0.96) | 0.97 (0.93,1.01) | 0.99 (0.93,1.05) |
|                          |                    | Sex: Female                       | 0.78 (0.73,0.84) | 0.91 (0.86,0.97) | 0.90 (0.86,0.95) | 0.91 (0.88,0.95) | 0.90 (0.86,0.94) | 0.86 (0.81,0.92) |
|                          | Sex: Male          | 0.87 (0.83,0.92)                  | 1.00 (0.96,1.06) | 1.02 (0.98,1.06) | 1.06 (1.03,1.09) | 1.08 (1.05,1.12) | 1.11 (1.05,1.16) |                  |
|                          | Composite venous   | Age group: <40                    | 1.17 (0.87,1.59) | 2.02 (1.59,2.58) | 1.33 (1.08,1.65) | 1.09 (0.95,1.24) | 0.90 (0.79,1.02) | 0.70 (0.54,0.90) |
|                          |                    | Age group: 40-59                  | 0.64 (0.55,0.76) | 1.12 (0.99,1.28) | 1.14 (1.03,1.26) | 0.95 (0.89,1.03) | 0.94 (0.87,1.01) | 0.86 (0.75,0.97) |
|                          |                    | Age group: 60-79                  | 0.76 (0.68,0.86) | 0.83 (0.74,0.92) | 0.74 (0.68,0.82) | 0.78 (0.72,0.84) | 0.83 (0.74,0.94) | 0.76 (0.68,0.86) |
|                          |                    | Age group: >=80                   | 0.78 (0.64,0.97) | 0.70 (0.56,0.88) | 0.75 (0.63,0.90) | 0.81 (0.70,0.94) | 1.03 (0.90,1.19) | 1.06 (0.85,1.32) |
|                          |                    | Ethnicity: White                  | 0.80 (0.73,0.87) | 1.01 (0.93,1.09) | 0.97 (0.91,1.03) | 0.90 (0.86,0.94) | 0.92 (0.88,0.97) | 0.83 (0.77,0.89) |
|                          |                    | Ethnicity: Black or Black British | 0.93 (0.56,1.57) | 1.06 (0.65,1.73) | 1.26 (0.89,1.78) | 1.17 (0.94,1.44) | 0.87 (0.71,1.07) | 0.86 (0.58,1.27) |
|                          |                    | Ethnicity: Asian or Asian British | 0.83 (0.50,1.38) | 0.85 (0.51,1.43) | 0.87 (0.60,1.26) | 1.05 (0.84,1.31) | 1.03 (0.82,1.31) | 0.62 (0.38,1.03) |
|                          |                    | Ethnicity: Other Ethnic Groups    | 0.69 (0.24,1.97) | 1.58 (0.75,3.33) | 0.85 (0.43,1.69) | 0.96 (0.66,1.41) | 0.91 (0.63,1.31) | 0.30 (0.10,0.84) |
|                          |                    | Ethnicity: Mixed                  | 0.40 (0.10,1.64) | 1.15 (0.50,2.66) | 0.29 (0.09,0.92) | 0.84 (0.56,1.27) | 0.72 (0.49,1.06) | 1.18 (0.64,2.19) |
|                          |                    | Ethnicity: Unknown                | 1.39 (0.67,2.85) | 1.07 (0.46,2.50) | 1.91 (1.15,3.16) | 1.58 (1.12,2.22) | 2.11 (1.50,2.98) | 2.21 (1.24,3.93) |
|                          |                    | No prior history of COVID-19      | 0.80 (0.73,0.87) | 1.01 (0.94,1.09) | 0.97 (0.92,1.03) | 0.91 (0.88,0.95) | 0.93 (0.89,0.98) | 0.83 (0.78,0.90) |
|                          |                    | Prior history of COVID-19         | 0.89 (0.59,1.33) | 1.10 (0.75,1.61) | 1.09 (0.81,1.46) | 1.04 (0.84,1.30) | 1.04 (0.81,1.33) | 0.88 (0.57,1.36) |
|                          |                    | No prior history of event         | 0.83 (0.76,0.90) | 1.02 (0.94,1.11) | 0.96 (0.91,1.03) | 0.93 (0.89,0.97) | 0.94 (0.90,0.99) | 0.82 (0.76,0.88) |
|                          |                    | Prior history of event            | 0.64 (0.51,0.80) | 0.93 (0.77,1.12) | 0.99 (0.86,1.14) | 0.78 (0.71,0.87) | 0.83 (0.74,0.92) | 0.86 (0.73,1.03) |
| Sex: Female              |                    | 0.82 (0.73,0.92)                  | 1.01 (0.91,1.12) | 0.97 (0.89,1.05) | 0.88 (0.83,0.93) | 0.90 (0.85,0.96) | 0.83 (0.75,0.92) |                  |
| Sex: Male                | 0.81 (0.72,0.91)   | 1.05 (0.95,1.17)                  | 1.03 (0.95,1.12) | 1.01 (0.95,1.07) | 1.04 (0.97,1.10) | 0.91 (0.82,1.00) |                  |                  |

Supplementary Table 27: Subgroup-specific maximally-adjusted hazard ratios and 95% CIs for composite arterial and composite venous events by time since COVID-19 dose 1&2 vaccination.

| Vaccination course              | Event              | Stratum                           | Week 1           | Week 2           | Weeks 3-4        | Weeks 5-12       | Weeks 13-24      | Weeks 25-26      |
|---------------------------------|--------------------|-----------------------------------|------------------|------------------|------------------|------------------|------------------|------------------|
| <b>Doses 1&amp;2: BNT-162b2</b> | Composite arterial | Age group: <40                    | 1.02 (0.73,1.42) | 1.22 (0.89,1.66) | 0.85 (0.65,1.13) | 1.03 (0.84,1.27) | 1.11 (0.86,1.43) | 1.33 (0.88,2.00) |
|                                 |                    | Age group: 40-59                  | 0.73 (0.64,0.83) | 0.82 (0.72,0.93) | 0.85 (0.77,0.94) | 0.78 (0.72,0.84) | 0.70 (0.64,0.77) | 0.63 (0.55,0.72) |
|                                 |                    | Age group: 60-79                  | 0.72 (0.67,0.78) | 0.82 (0.76,0.88) | 0.77 (0.73,0.83) | 0.70 (0.66,0.75) | 0.65 (0.60,0.70) | 0.62 (0.57,0.68) |
|                                 |                    | Age group: >=80                   | 0.72 (0.67,0.78) | 0.79 (0.73,0.85) | 0.84 (0.79,0.89) | 0.86 (0.82,0.90) | 0.83 (0.78,0.88) | 0.82 (0.75,0.89) |
|                                 |                    | Ethnicity: White                  | 0.72 (0.69,0.76) | 0.81 (0.78,0.86) | 0.81 (0.78,0.85) | 0.81 (0.78,0.84) | 0.81 (0.78,0.84) | 0.81 (0.76,0.86) |
|                                 |                    | Ethnicity: Black or Black British | 0.71 (0.48,1.05) | 0.99 (0.70,1.40) | 0.86 (0.65,1.14) | 0.73 (0.58,0.91) | 0.73 (0.57,0.92) | 0.71 (0.49,1.05) |
|                                 |                    | Ethnicity: Asian or Asian British | 0.75 (0.62,0.92) | 0.84 (0.69,1.02) | 0.91 (0.78,1.05) | 0.82 (0.73,0.92) | 0.74 (0.65,0.85) | 0.75 (0.62,0.92) |
|                                 |                    | Ethnicity: Other Ethnic Groups    | 1.08 (0.70,1.66) | 0.94 (0.59,1.48) | 0.77 (0.52,1.13) | 0.80 (0.60,1.06) | 0.72 (0.52,0.99) | 0.82 (0.50,1.35) |
|                                 |                    | Ethnicity: Mixed                  | 0.51 (0.25,1.04) | 0.27 (0.10,0.68) | 0.56 (0.33,0.95) | 0.71 (0.47,1.05) | 0.76 (0.50,1.16) | 0.86 (0.43,1.73) |
|                                 |                    | Ethnicity: Unknown                | 0.65 (0.39,1.08) | 0.59 (0.34,1.03) | 0.74 (0.50,1.10) | 0.84 (0.61,1.14) | 0.60 (0.41,0.86) | 0.42 (0.24,0.75) |
|                                 |                    | No prior history of COVID-19      | 0.72 (0.69,0.76) | 0.81 (0.77,0.85) | 0.81 (0.78,0.84) | 0.80 (0.78,0.83) | 0.79 (0.76,0.82) | 0.79 (0.75,0.84) |
|                                 |                    | Prior history of COVID-19         | 0.73 (0.57,0.93) | 0.93 (0.74,1.16) | 0.87 (0.72,1.05) | 0.88 (0.76,1.03) | 0.81 (0.67,0.96) | 0.81 (0.62,1.06) |
|                                 |                    | No prior history of event         | 0.70 (0.65,0.75) | 0.84 (0.79,0.90) | 0.83 (0.79,0.88) | 0.83 (0.79,0.86) | 0.80 (0.76,0.84) | 0.76 (0.71,0.81) |
|                                 |                    | Prior history of event            | 0.77 (0.72,0.82) | 0.80 (0.75,0.86) | 0.82 (0.78,0.86) | 0.78 (0.74,0.81) | 0.74 (0.70,0.78) | 0.78 (0.72,0.84) |
|                                 |                    | Sex: Female                       | 0.69 (0.64,0.75) | 0.79 (0.73,0.85) | 0.81 (0.76,0.86) | 0.77 (0.73,0.81) | 0.74 (0.69,0.78) | 0.75 (0.69,0.81) |
|                                 | Sex: Male          | 0.76 (0.71,0.81)                  | 0.85 (0.80,0.90) | 0.84 (0.80,0.88) | 0.86 (0.83,0.90) | 0.89 (0.85,0.94) | 0.90 (0.84,0.97) |                  |
|                                 | Composite venous   | Age group: <40                    | 0.76 (0.56,1.03) | 0.92 (0.69,1.22) | 0.60 (0.46,0.77) | 0.74 (0.63,0.87) | 0.78 (0.66,0.94) | 0.76 (0.54,1.07) |
|                                 |                    | Age group: 40-59                  | 0.79 (0.62,1.02) | 0.93 (0.73,1.17) | 0.79 (0.65,0.95) | 0.77 (0.67,0.88) | 0.71 (0.62,0.83) | 0.67 (0.54,0.85) |
|                                 |                    | Age group: 60-79                  | 0.74 (0.62,0.88) | 0.73 (0.61,0.87) | 0.68 (0.58,0.79) | 0.64 (0.55,0.75) | 0.64 (0.54,0.76) | 0.61 (0.49,0.75) |
|                                 |                    | Age group: >=80                   | 0.61 (0.50,0.75) | 0.72 (0.60,0.87) | 0.78 (0.67,0.92) | 0.75 (0.65,0.85) | 0.71 (0.61,0.83) | 0.69 (0.56,0.86) |
|                                 |                    | Ethnicity: White                  | 0.73 (0.65,0.82) | 0.84 (0.75,0.93) | 0.77 (0.71,0.84) | 0.78 (0.73,0.83) | 0.80 (0.74,0.87) | 0.77 (0.69,0.87) |
|                                 |                    | Ethnicity: Black or Black British | 0.48 (0.19,1.18) | 0.89 (0.46,1.73) | 0.85 (0.51,1.40) | 0.64 (0.45,0.93) | 0.70 (0.49,1.01) | 0.42 (0.19,0.92) |
|                                 |                    | Ethnicity: Asian or Asian British | 0.79 (0.42,1.46) | 0.33 (0.14,0.77) | 0.76 (0.49,1.19) | 0.68 (0.50,0.94) | 0.63 (0.44,0.89) | 0.65 (0.36,1.19) |
|                                 |                    | Ethnicity: Other Ethnic Groups    | 1.03 (0.37,2.88) | 0.16 (0.02,1.31) | 0.37 (0.13,1.08) | 0.64 (0.35,1.18) | 0.45 (0.21,0.97) | 0.60 (0.19,1.96) |
|                                 |                    | Ethnicity: Mixed                  | 1.11 (0.32,3.84) | 2.02 (0.73,5.62) | 0.86 (0.33,2.25) | 0.78 (0.36,1.69) | 0.72 (0.31,1.72) | 0.53 (0.11,2.68) |
|                                 |                    | Ethnicity: Unknown                | 0.72 (0.18,2.82) | 0.91 (0.28,2.91) | 1.17 (0.56,2.46) | 0.86 (0.45,1.62) | 0.62 (0.27,1.43) | 0.72 (0.21,2.44) |
|                                 |                    | No prior history of COVID-19      | 0.73 (0.66,0.82) | 0.82 (0.74,0.91) | 0.77 (0.71,0.84) | 0.78 (0.73,0.84) | 0.80 (0.74,0.86) | 0.77 (0.68,0.86) |
|                                 |                    | Prior history of COVID-19         | 0.69 (0.43,1.09) | 0.88 (0.58,1.34) | 0.84 (0.61,1.16) | 0.63 (0.49,0.81) | 0.66 (0.50,0.86) | 0.84 (0.55,1.28) |
|                                 |                    | No prior history of event         | 0.74 (0.66,0.83) | 0.80 (0.72,0.90) | 0.76 (0.70,0.83) | 0.77 (0.72,0.82) | 0.76 (0.70,0.82) | 0.71 (0.63,0.80) |
|                                 |                    | Prior history of event            | 0.68 (0.51,0.89) | 0.92 (0.72,1.17) | 0.81 (0.66,0.99) | 0.72 (0.61,0.85) | 0.74 (0.62,0.88) | 0.82 (0.64,1.05) |
| Sex: Female                     |                    | 0.72 (0.62,0.83)                  | 0.81 (0.71,0.93) | 0.76 (0.68,0.85) | 0.75 (0.69,0.82) | 0.74 (0.67,0.82) | 0.71 (0.62,0.82) |                  |
| Sex: Male                       | 0.76 (0.65,0.89)   | 0.83 (0.72,0.97)                  | 0.78 (0.69,0.89) | 0.81 (0.74,0.90) | 0.88 (0.79,0.99) | 0.87 (0.73,1.03) |                  |                  |
| <b>Doses 1&amp;2: ChAdOx1</b>   | Composite arterial | Age group: <40                    | 0.56 (0.37,0.86) | 0.89 (0.63,1.28) | 0.63 (0.46,0.87) | 0.65 (0.49,0.85) | 0.54 (0.38,0.76) | 0.68 (0.43,1.07) |
|                                 |                    | Age group: 40-59                  | 0.70 (0.64,0.77) | 0.82 (0.75,0.89) | 0.80 (0.74,0.85) | 0.81 (0.76,0.86) | 0.81 (0.75,0.88) | 0.83 (0.74,0.92) |
|                                 |                    | Age group: 60-79                  | 0.73 (0.69,0.77) | 0.83 (0.78,0.88) | 0.79 (0.75,0.83) | 0.72 (0.69,0.75) | 0.68 (0.64,0.72) | 0.66 (0.61,0.71) |
|                                 |                    | Age group: >=80                   | 0.70 (0.64,0.77) | 0.77 (0.70,0.84) | 0.70 (0.65,0.75) | 0.69 (0.64,0.73) | 0.66 (0.62,0.72) | 0.67 (0.60,0.74) |
|                                 |                    | Ethnicity: White                  | 0.71 (0.68,0.75) | 0.84 (0.80,0.87) | 0.79 (0.77,0.82) | 0.76 (0.74,0.79) | 0.74 (0.71,0.77) | 0.74 (0.70,0.78) |
|                                 |                    | Ethnicity: Black or Black British | 0.75 (0.57,0.99) | 0.67 (0.50,0.89) | 0.72 (0.58,0.89) | 0.72 (0.61,0.85) | 0.65 (0.53,0.79) | 0.58 (0.43,0.79) |
|                                 |                    | Ethnicity: Asian or Asian British | 0.71 (0.60,0.83) | 0.80 (0.69,0.94) | 0.80 (0.71,0.91) | 0.70 (0.63,0.78) | 0.65 (0.57,0.73) | 0.66 (0.55,0.78) |
|                                 |                    | Ethnicity: Other Ethnic Groups    | 0.56 (0.36,0.86) | 0.81 (0.56,1.17) | 0.64 (0.47,0.87) | 0.63 (0.49,0.82) | 0.73 (0.52,1.01) | 0.77 (0.50,1.20) |
|                                 |                    | Ethnicity: Mixed                  | 1.09 (0.68,1.77) | 0.98 (0.60,1.59) | 1.09 (0.76,1.58) | 0.97 (0.70,1.36) | 0.89 (0.58,1.36) | 1.02 (0.57,1.83) |
|                                 |                    | Ethnicity: Unknown                | 0.90 (0.64,1.27) | 0.85 (0.59,1.21) | 0.84 (0.63,1.12) | 0.75 (0.57,0.98) | 0.72 (0.51,1.02) | 0.69 (0.43,1.10) |
|                                 |                    | No prior history of COVID-19      | 0.72 (0.69,0.75) | 0.83 (0.80,0.87) | 0.79 (0.76,0.82) | 0.76 (0.74,0.78) | 0.73 (0.70,0.76) | 0.73 (0.69,0.77) |
|                                 |                    | Prior history of COVID-19         | 0.71 (0.61,0.83) | 0.77 (0.66,0.90) | 0.80 (0.72,0.90) | 0.68 (0.61,0.75) | 0.68 (0.60,0.77) | 0.68 (0.57,0.81) |
|                                 |                    | No prior history of event         | 0.68 (0.64,0.72) | 0.82 (0.78,0.87) | 0.83 (0.79,0.86) | 0.74 (0.72,0.77) | 0.68 (0.65,0.71) | 0.63 (0.60,0.68) |
|                                 |                    | Prior history of event            | 0.74 (0.70,0.79) | 0.81 (0.76,0.86) | 0.71 (0.68,0.75) | 0.72 (0.69,0.75) | 0.71 (0.68,0.75) | 0.76 (0.71,0.82) |
|                                 |                    | Sex: Female                       | 0.70 (0.66,0.75) | 0.82 (0.77,0.88) | 0.77 (0.73,0.81) | 0.75 (0.71,0.79) | 0.73 (0.69,0.78) | 0.75 (0.69,0.81) |
|                                 | Sex: Male          | 0.74 (0.70,0.78)                  | 0.85 (0.81,0.89) | 0.82 (0.79,0.86) | 0.79 (0.76,0.82) | 0.77 (0.73,0.81) | 0.77 (0.72,0.83) |                  |
|                                 | Composite venous   | Age group: <40                    | 0.60 (0.41,0.88) | 0.89 (0.64,1.22) | 0.59 (0.43,0.80) | 0.49 (0.39,0.61) | 0.48 (0.37,0.62) | 0.44 (0.30,0.66) |
|                                 |                    | Age group: 40-59                  | 0.71 (0.60,0.83) | 0.86 (0.74,1.01) | 0.85 (0.75,0.96) | 0.70 (0.63,0.79) | 0.73 (0.64,0.84) | 0.71 (0.59,0.85) |
|                                 |                    | Age group: 60-79                  | 0.69 (0.61,0.79) | 0.75 (0.66,0.85) | 0.68 (0.61,0.76) | 0.61 (0.55,0.67) | 0.52 (0.46,0.59) | 0.55 (0.47,0.64) |
|                                 |                    | Age group: >=80                   | 0.85 (0.68,1.06) | 0.89 (0.72,1.11) | 0.82 (0.68,0.99) | 0.68 (0.58,0.80) | 0.62 (0.52,0.74) | 0.60 (0.47,0.77) |
|                                 |                    | Ethnicity: White                  | 0.73 (0.67,0.80) | 0.84 (0.77,0.92) | 0.79 (0.73,0.84) | 0.70 (0.66,0.75) | 0.67 (0.61,0.72) | 0.68 (0.61,0.76) |
|                                 |                    | Ethnicity: Black or Black British | 0.60 (0.31,1.14) | 0.71 (0.39,1.30) | 0.89 (0.58,1.37) | 0.83 (0.59,1.15) | 0.75 (0.51,1.10) | 0.45 (0.24,0.83) |
|                                 |                    | Ethnicity: Asian or Asian British | 0.56 (0.30,1.04) | 0.77 (0.44,1.34) | 0.95 (0.64,1.40) | 0.67 (0.48,0.95) | 0.55 (0.36,0.86) | 0.67 (0.36,1.25) |
|                                 |                    | Ethnicity: Other Ethnic Groups    | 0.26 (0.06,1.12) | 1.20 (0.55,2.60) | 0.85 (0.42,1.72) | 0.79 (0.43,1.45) | 0.72 (0.33,1.57) | 0.81 (0.24,2.75) |
|                                 |                    | Ethnicity: Mixed                  | 1.37 (0.59,3.21) | 0.49 (0.14,1.69) | 0.56 (0.24,1.30) | 0.47 (0.22,1.02) | 0.54 (0.23,1.31) | 0.73 (0.22,2.48) |
|                                 |                    | Ethnicity: Unknown                | 0.73 (0.33,1.62) | 1.10 (0.55,2.19) | 0.94 (0.52,1.69) | 0.95 (0.56,1.64) | 0.74 (0.37,1.46) | 0.83 (0.34,2.03) |
|                                 |                    | No prior history of COVID-19      | 0.71 (0.65,0.78) | 0.82 (0.75,0.90) | 0.80 (0.75,0.86) | 0.70 (0.66,0.74) | 0.65 (0.60,0.71) | 0.67 (0.60,0.74) |
|                                 |                    | Prior history of COVID-19         | 0.90 (0.67,1.20) | 1.08 (0.82,1.43) | 0.71 (0.55,0.92) | 0.81 (0.66,0.99) | 0.85 (0.66,1.10) | 0.84 (0.58,1.21) |
|                                 |                    | No prior history of event         | 0.73 (0.67,0.80) | 0.83 (0.76,0.91) | 0.78 (0.73,0.84) | 0.70 (0.65,0.74) | 0.65 (0.60,0.70) | 0.64 (0.57,0.71) |
|                                 |                    | Prior history of event            | 0.65 (0.52,0.82) | 0.87 (0.71,1.06) | 0.79 (0.68,0.93) | 0.66 (0.58,0.76) | 0.63 (0.54,0.74) | 0.72 (0.58,0.91) |
| Sex: Female                     |                    | 0.71 (0.63,0.81)                  | 0.80 (0.71,0.90) | 0.78 (0.71,0.86) | 0.68 (0.62,0.74) | 0.64 (0.58,0.71) | 0.65 (0.57,0.75) |                  |
| Sex: Male                       | 0.74 (0.65,0.83)   | 0.88 (0.79,0.99)                  | 0.81 (0.74,0.89) | 0.75 (0.69,0.81) | 0.72 (0.65,0.81) | 0.75 (0.65,0.87) |                  |                  |

Supplementary Table 28: Subgroup-specific maximally-adjusted hazard ratios and 95% CIs for composite arterial and composite venous events by time since booster vaccination with BNT-162b2 or mRNA-1273 for those on a primary course of ChAdOx1.

| Vaccination course                                    | Event              | Stratum                           | Week 1            | Week 2            | Weeks 3-4         | Weeks 5-12        | Weeks 13-24       |
|-------------------------------------------------------|--------------------|-----------------------------------|-------------------|-------------------|-------------------|-------------------|-------------------|
|                                                       |                    |                                   | Weeks 1-4         |                   | Weeks 5-24        |                   |                   |
| <b>Doses 1&amp;2: ChAdOx1;<br/>Booster: BNT-162b2</b> | Composite arterial | Age group: <40                    | 0.88 (0.50, 1.57) | 0.52 (0.26, 1.07) | 0.53 (0.31, 0.90) | 0.50 (0.31, 0.80) | 1.01 (0.30, 3.36) |
|                                                       |                    | Age group: 40-59                  | 0.70 (0.62, 0.79) | 0.79 (0.70, 0.89) | 0.83 (0.75, 0.91) | 0.82 (0.75, 0.90) | 0.85 (0.64, 1.12) |
|                                                       |                    | Age group: 60-79                  | 0.79 (0.74, 0.84) | 0.81 (0.76, 0.86) | 0.80 (0.76, 0.84) | 0.73 (0.70, 0.77) | 0.65 (0.59, 0.72) |
|                                                       |                    | Age group: >=80                   | 0.78 (0.70, 0.86) | 0.79 (0.71, 0.88) | 0.80 (0.73, 0.86) | 0.75 (0.70, 0.80) | 0.70 (0.62, 0.80) |
|                                                       |                    | Ethnicity: White                  | 0.78 (0.74, 0.83) | 0.82 (0.77, 0.86) | 0.82 (0.79, 0.85) | 0.78 (0.75, 0.80) | 0.69 (0.64, 0.75) |
|                                                       |                    | Ethnicity: Black or Black British | 0.96 (0.65, 1.41) | 0.90 (0.60, 1.35) | 0.91 (0.67, 1.24) | 0.82 (0.63, 1.07) | 1.12 (0.61, 2.05) |
|                                                       |                    | Ethnicity: Asian or Asian British | 0.78 (0.63, 0.97) | 0.89 (0.72, 1.09) | 0.87 (0.74, 1.02) | 0.75 (0.65, 0.85) | 0.80 (0.58, 1.11) |
|                                                       |                    | Ethnicity: Other Ethnic Groups    | 0.81 (0.50, 1.32) | 0.80 (0.49, 1.30) | 0.78 (0.53, 1.14) | 0.67 (0.49, 0.92) | 0.51 (0.21, 1.26) |
|                                                       |                    | Ethnicity: Mixed                  | 0.63 (0.29, 1.38) | 0.46 (0.18, 1.15) | 1.00 (0.61, 1.63) | 0.70 (0.43, 1.14) | 0.56 (0.16, 1.99) |
|                                                       |                    | Ethnicity: Unknown                | 0.57 (0.35, 0.94) | 0.50 (0.29, 0.87) | 0.69 (0.48, 0.99) | 0.70 (0.51, 0.97) | 0.72 (0.33, 1.57) |
|                                                       |                    | No prior history of COVID-19      | 0.78 (0.74,0.82)  | 0.82 (0.78,0.86)  | 0.83 (0.79,0.86)  | 0.78 (0.75,0.81)  | 0.71 (0.65,0.76)  |
|                                                       |                    | Prior history of COVID-19         | 0.90 (0.75,1.08)  | 0.81 (0.67,0.99)  | 0.83 (0.72,0.96)  | 0.76 (0.67,0.86)  | 0.72 (0.54,0.95)  |
|                                                       |                    | No prior history of event         | 0.70 (0.66,0.75)  | 0.78 (0.74,0.84)  | 0.76 (0.72,0.80)  | 0.71 (0.68,0.74)  | 0.63 (0.57,0.69)  |
|                                                       |                    | Prior history of event            | 0.89 (0.82,0.95)  | 0.84 (0.78,0.91)  | 0.89 (0.84,0.95)  | 0.85 (0.81,0.89)  | 0.80 (0.72,0.90)  |
|                                                       | Sex: Female        | 0.83 (0.77,0.90)                  | 0.80 (0.74,0.87)  | 0.85 (0.80,0.90)  | 0.80 (0.76,0.85)  | 0.70 (0.62,0.79)  |                   |
|                                                       | Sex: Male          | 0.77 (0.72,0.82)                  | 0.85 (0.80,0.90)  | 0.84 (0.80,0.88)  | 0.81 (0.77,0.84)  | 0.76 (0.69,0.84)  |                   |
|                                                       | Composite venous   | Age group: <40                    | 0.81 (0.46, 1.41) | 1.15 (0.71, 1.88) | 0.96 (0.65, 1.41) | 0.68 (0.47, 0.99) | 1.24 (0.48, 3.17) |
|                                                       |                    | Age group: 40-59                  | 0.71 (0.57, 0.89) | 0.91 (0.75, 1.12) | 0.75 (0.63, 0.89) | 0.79 (0.68, 0.92) | 0.57 (0.33, 0.97) |
|                                                       |                    | Age group: 60-79                  | 0.62 (0.53, 0.71) | 0.62 (0.54, 0.71) | 0.64 (0.58, 0.72) | 0.53 (0.48, 0.59) | 0.58 (0.47, 0.72) |
|                                                       |                    | Age group: >=80                   | 0.55 (0.42, 0.73) | 0.59 (0.45, 0.77) | 0.56 (0.46, 0.69) | 0.53 (0.45, 0.62) | 0.46 (0.33, 0.65) |
|                                                       |                    | Ethnicity: White                  | 0.68 (0.61, 0.76) | 0.74 (0.67, 0.83) | 0.72 (0.67, 0.79) | 0.65 (0.60, 0.70) | 0.64 (0.55, 0.76) |
|                                                       |                    | Ethnicity: Black or Black British |                   | 0.69 (0.44, 1.09) |                   | 0.49 (0.29, 0.82) |                   |
|                                                       |                    | Ethnicity: Asian or Asian British | 0.37 (0.14, 1.00) | 1.15 (0.62, 2.16) | 0.72 (0.40, 1.28) | 0.75 (0.48, 1.20) | 0.51 (0.11, 2.45) |
|                                                       |                    | Ethnicity: Other Ethnic Groups    |                   | 0.78 (0.33, 1.82) |                   | 0.89 (0.36, 2.20) |                   |
|                                                       |                    | Ethnicity: Mixed                  | 1.14 (0.28, 4.62) | 1.35 (0.35, 5.11) | 1.75 (0.80, 3.83) | 0.32 (0.12, 0.85) | 0.84 (0.14, 5.11) |
|                                                       |                    | Ethnicity:                        | 0.22 (0.05, 0.92) | 0.43 (0.15, 1.19) | 0.42 (0.20, 0.88) | 0.40 (0.21, 0.74) | 0.81 (0.26, 2.49) |
|                                                       |                    | No prior history of COVID-19      | 0.66 (0.59,0.74)  | 0.72 (0.65,0.80)  | 0.71 (0.66,0.77)  | 0.64 (0.59,0.69)  | 0.62 (0.52,0.73)  |
|                                                       |                    | Prior history of COVID-19         | 0.84 (0.57,1.25)  | 1.03 (0.72,1.48)  | 0.87 (0.64,1.17)  | 0.61 (0.47,0.81)  | 0.66 (0.35,1.23)  |
| No prior history of event                             |                    | 0.67 (0.60,0.75)                  | 0.72 (0.64,0.80)  | 0.72 (0.66,0.79)  | 0.62 (0.57,0.67)  | 0.59 (0.50,0.70)  |                   |
| Prior history of event                                |                    | 0.63 (0.47,0.85)                  | 0.86 (0.66,1.12)  | 0.68 (0.55,0.85)  | 0.70 (0.58,0.83)  | 0.74 (0.49,1.11)  |                   |
| Sex: Female                                           | 0.74 (0.64,0.85)   | 0.77 (0.67,0.89)                  | 0.76 (0.68,0.84)  | 0.66 (0.60,0.73)  | 0.54 (0.43,0.67)  |                   |                   |
| Sex: Male                                             | 0.62 (0.52,0.72)   | 0.73 (0.63,0.85)                  | 0.71 (0.64,0.80)  | 0.66 (0.59,0.73)  | 0.81 (0.65,1.01)  |                   |                   |
| <b>Doses 1&amp;2: ChAdOx1;<br/>Booster: mRNA-1273</b> | Composite arterial | Age group: <40                    |                   | 0.72 (0.40, 1.27) |                   | 0.46 (0.19, 1.10) |                   |
|                                                       |                    | Age group: 40-59                  |                   | 0.84 (0.76, 0.94) |                   | 0.73 (0.63,0.85)  |                   |
|                                                       |                    | Age group: 60-79                  |                   | 0.72 (0.66, 0.79) |                   | 0.60 (0.54, 0.67) |                   |
|                                                       |                    | Age group: >=80                   |                   | 0.80 (0.65, 0.99) |                   | 0.88 (0.70, 1.10) |                   |
|                                                       |                    | Ethnicity: White                  |                   | 0.76 (0.71, 0.81) |                   | 0.66 (0.61, 0.72) |                   |
|                                                       |                    | Ethnicity: Black or Black British |                   | 0.72 (0.42, 1.21) |                   | 0.51 (0.24, 1.07) |                   |
|                                                       |                    | Ethnicity: Asian or Asian British |                   | 0.74 (0.57, 0.96) |                   | 0.81 (0.59, 1.11) |                   |
|                                                       |                    | Ethnicity: Other Ethnic Groups    |                   | 1.07 (0.64, 1.79) |                   | 0.75 (0.37, 1.54) |                   |
|                                                       |                    | Ethnicity: Mixed                  |                   | 0.57 (0.24, 1.34) |                   | 0.17 (0.04, 0.78) |                   |
|                                                       |                    | Ethnicity: Unknown                |                   | 0.81 (0.54, 1.23) |                   | 0.44 (0.24, 0.81) |                   |
|                                                       |                    | No prior history of COVID-19      |                   | 0.76 (0.71, 0.81) |                   | 0.67 (0.61, 0.72) |                   |
|                                                       |                    | Prior history of COVID-19         |                   | 0.86 (0.68, 1.10) |                   | 0.62 (0.45, 0.86) |                   |
|                                                       |                    | No prior history of event         |                   | 0.71 (0.66, 0.77) |                   | 0.61 (0.56, 0.67) |                   |
|                                                       |                    | Prior history of event            |                   | 0.88 (0.79, 0.98) |                   | 0.74 (0.64, 0.84) |                   |
|                                                       | Sex: Female        |                                   | 0.76 (0.68, 0.84) |                   | 0.65 (0.56, 0.74) |                   |                   |
|                                                       | Sex: Male          |                                   | 0.78 (0.72, 0.84) |                   | 0.68 (0.62, 0.75) |                   |                   |
|                                                       | Composite venous   | Age group: <40                    |                   | 0.67 (0.41, 1.11) |                   | 0.69 (0.36, 1.33) |                   |
|                                                       |                    | Age group: 40-59                  |                   | 0.63 (0.52, 0.77) |                   | 0.64 (0.50, 0.82) |                   |
|                                                       |                    | Age group: 60-79                  |                   | 0.51 (0.42, 0.61) |                   | 0.40 (0.32, 0.50) |                   |
|                                                       |                    | Age group: >=80                   |                   | 0.49 (0.27, 0.88) |                   | 0.81 (0.46, 1.42) |                   |
|                                                       |                    | Ethnicity: White                  |                   | 0.58 (0.51, 0.66) |                   | 0.54 (0.46, 0.63) |                   |
|                                                       |                    | Ethnicity: Black or Black British |                   | 0.61 (0.24, 1.58) |                   | 0.52 (0.15, 1.80) |                   |
|                                                       |                    | Ethnicity: Asian or Asian British |                   | 0.31 (0.10, 1.01) |                   | 0.37 (0.09, 1.62) |                   |
|                                                       |                    | Ethnicity: Other Ethnic Groups    |                   | 0.97 (0.23, 4.03) |                   | 2.05 (0.44, 9.59) |                   |
|                                                       |                    | Ethnicity: Mixed                  |                   | 1.78 (0.54, 5.83) |                   | 1.16 (0.19, 7.08) |                   |
|                                                       |                    | Ethnicity: Unknown                |                   | 0.35 (0.13, 0.94) |                   | 0.26 (0.08, 0.78) |                   |
|                                                       |                    | No prior history of COVID-19      |                   | 0.58 (0.51,0.65)  |                   | 0.56 (0.48,0.66)  |                   |
|                                                       |                    | Prior history of COVID-19         |                   | 0.75 (0.48,1.18)  |                   | 0.45 (0.22,0.91)  |                   |
| No prior history of event                             |                    |                                   | 0.55 (0.48,0.62)  |                   | 0.51 (0.43,0.61)  |                   |                   |
| Prior history of event                                |                    |                                   | 0.83 (0.61,1.15)  |                   | 0.75 (0.50,1.12)  |                   |                   |
| Sex: Female                                           |                    | 0.54 (0.45,0.65)                  |                   | 0.55 (0.44,0.69)  |                   |                   |                   |
| Sex: Male                                             |                    | 0.64 (0.55,0.76)                  |                   | 0.58 (0.47,0.72)  |                   |                   |                   |

Supplementary Table 29: Subgroup-specific maximally-adjusted hazard ratios and 95% CIs for composite arterial and composite venous events by time since booster with BNT-162b2 or mRNA-1273 for those on a primary course of BNT-162b2<sup>10</sup>.

| Vaccination course                          | Event              | Stratum                           | Week 1            | Week 2            | Weeks 3-4         | Weeks 5-12        | Weeks 13-24          |
|---------------------------------------------|--------------------|-----------------------------------|-------------------|-------------------|-------------------|-------------------|----------------------|
|                                             |                    |                                   |                   | Weeks 1-4         |                   |                   |                      |
| Doses 1&2: BNT-162b2;<br>Booster: BNT-162b2 | Composite arterial | Age group: <40                    | 0.71 (0.40, 1.29) | 1.02 (0.60, 1.75) | 0.71 (0.45, 1.12) | 1.17 (0.79, 1.73) | 1.04 (0.44, 2.45)    |
|                                             |                    | Age group: 40-59                  | 0.67 (0.56, 0.80) | 0.78 (0.66, 0.92) | 0.85 (0.75, 0.96) | 0.79 (0.71, 0.87) | 0.70 (0.56, 0.88)    |
|                                             |                    | Age group: 60-79                  | 0.67 (0.62, 0.73) | 0.79 (0.73, 0.86) | 0.77 (0.72, 0.82) | 0.73 (0.69, 0.78) | 0.68 (0.61, 0.75)    |
|                                             |                    | Age group: >=80                   | 0.65 (0.60, 0.70) | 0.69 (0.64, 0.75) | 0.71 (0.67, 0.76) | 0.68 (0.64, 0.72) | 0.63 (0.58, 0.68)    |
|                                             |                    | Ethnicity: White                  | 0.68 (0.64, 0.72) | 0.79 (0.74, 0.83) | 0.79 (0.76, 0.83) | 0.77 (0.74, 0.80) | 0.72 (0.68, 0.76)    |
|                                             |                    | Ethnicity: Black or Black British | 0.96 (0.63, 1.48) | 0.86 (0.55, 1.34) | 0.73 (0.51, 1.05) | 0.75 (0.58, 0.98) | 1.03 (0.64, 1.66)    |
|                                             |                    | Ethnicity: Asian or Asian British | 0.75 (0.59, 0.96) | 0.72 (0.56, 0.93) | 0.83 (0.69, 1.00) | 0.88 (0.76, 1.01) | 0.71 (0.54, 0.92)    |
|                                             |                    | Ethnicity: Other Ethnic Groups    | 0.75 (0.42, 1.33) | 0.61 (0.33, 1.15) | 0.77 (0.49, 1.20) | 0.90 (0.64, 1.25) | 0.85 (0.45, 1.61)    |
|                                             |                    | Ethnicity: Mixed                  | 0.50 (0.15, 1.70) | 0.60 (0.22, 1.66) | 1.36 (0.76, 2.44) | 1.00 (0.57, 1.74) | 2.04 (0.90, 4.64)    |
|                                             |                    | Ethnicity: Unknown                | 0.59 (0.32, 1.09) | 0.65 (0.36, 1.17) | 0.81 (0.53, 1.23) | 0.59 (0.41, 0.84) | 0.46 (0.24, 0.86)    |
|                                             |                    | No prior history of COVID-19      | 0.69 (0.65, 0.73) | 0.78 (0.74, 0.83) | 0.79 (0.76, 0.83) | 0.78 (0.75, 0.81) | 0.73 (0.69, 0.77)    |
|                                             |                    | Prior history of COVID-19         | 0.83 (0.64, 1.08) | 0.82 (0.63, 1.08) | 1.02 (0.84, 1.23) | 0.87 (0.74, 1.03) | 0.80 (0.59, 1.07)    |
|                                             |                    | No prior history of event         | 0.62 (0.58, 0.67) | 0.72 (0.68, 0.78) | 0.76 (0.72, 0.80) | 0.73 (0.69, 0.76) | 0.65 (0.60, 0.70)    |
|                                             |                    | Prior history of event            | 0.77 (0.71, 0.83) | 0.85 (0.78, 0.91) | 0.84 (0.79, 0.89) | 0.82 (0.78, 0.87) | 0.83 (0.76, 0.91)    |
|                                             |                    | Sex: Female                       | 0.67 (0.62, 0.73) | 0.76 (0.70, 0.82) | 0.81 (0.76, 0.86) | 0.76 (0.72, 0.80) | 0.71 (0.65, 0.78)    |
|                                             |                    | Sex: Male                         | 0.72 (0.67, 0.77) | 0.83 (0.77, 0.89) | 0.82 (0.78, 0.87) | 0.84 (0.80, 0.88) | 0.79 (0.73, 0.86)    |
|                                             | Composite venous   | Age group: <40                    | 0.61 (0.35, 1.09) | 1.01 (0.64, 1.59) | 0.90 (0.62, 1.30) | 0.99 (0.71, 1.37) | 0.74 (0.32, 1.75)    |
|                                             |                    | Age group: 40-59                  | 0.85 (0.63, 1.14) | 0.65 (0.47, 0.91) | 0.72 (0.57, 0.92) | 0.66 (0.54, 0.79) | 0.60 (0.42, 0.86)    |
|                                             |                    | Age group: 60-79                  | 0.61 (0.51, 0.73) | 0.56 (0.47, 0.68) | 0.54 (0.47, 0.62) | 0.46 (0.40, 0.52) | 0.48 (0.38, 0.59)    |
|                                             |                    | Age group: >=80                   | 0.44 (0.36, 0.55) | 0.54 (0.44, 0.65) | 0.46 (0.40, 0.54) | 0.42 (0.37, 0.48) | 0.35 (0.29, 0.43)    |
|                                             |                    | Ethnicity: White                  | 0.63 (0.56, 0.72) | 0.65 (0.58, 0.73) | 0.65 (0.59, 0.71) | 0.60 (0.56, 0.65) | 0.55 (0.49, 0.63)    |
|                                             |                    | Ethnicity: Black or Black British | 0.45 (0.14, 1.44) | 0.49 (0.15, 1.60) | 0.57 (0.26, 1.24) | 0.81 (0.47, 1.40) | 0.41 (0.12, 1.39)    |
|                                             |                    | Ethnicity: Asian or Asian British | 0.45 (0.16, 1.22) | 0.44 (0.16, 1.22) | 0.60 (0.31, 1.16) | 0.55 (0.34, 0.89) | 0.52 (0.20, 1.35)    |
|                                             |                    | Ethnicity: Other Ethnic Groups    |                   | 0.48 (0.16, 1.45) |                   | 0.94 (0.40, 2.22) |                      |
|                                             |                    | Ethnicity: Mixed                  | 1.62 (0.30, 8.84) | 1.81 (0.34, 9.72) | 1.42 (0.34, 5.85) | 0.84 (0.24, 2.94) | 0.96 (0.09, 10.43)   |
|                                             |                    | Ethnicity: Unknown                | 0.46 (0.14, 1.56) | 1.13 (0.45, 2.79) | 0.17 (0.04, 0.72) | 0.44 (0.21, 0.94) | 0.21 (0.04, 1.22)    |
|                                             |                    | No prior history of COVID-19      | 0.62 (0.55, 0.70) | 0.66 (0.58, 0.74) | 0.64 (0.58, 0.70) | 0.60 (0.56, 0.65) | 0.54 (0.48, 0.62)    |
|                                             |                    | Prior history of COVID-19         | 0.81 (0.48, 1.39) | 0.65 (0.36, 1.17) | 0.67 (0.43, 1.05) | 0.70 (0.51, 0.97) | 0.63 (0.33, 1.19)    |
|                                             |                    | No prior history of event         | 0.60 (0.53, 0.69) | 0.65 (0.57, 0.74) | 0.62 (0.57, 0.69) | 0.59 (0.55, 0.64) | 0.53 (0.46, 0.60)    |
|                                             |                    | Prior history of event            | 0.72 (0.54, 0.96) | 0.66 (0.49, 0.89) | 0.70 (0.56, 0.88) | 0.64 (0.53, 0.77) | 0.66 (0.47, 0.92)    |
|                                             |                    | Sex: Female                       | 0.58 (0.50, 0.69) | 0.60 (0.51, 0.70) | 0.60 (0.53, 0.67) | 0.58 (0.53, 0.64) | 0.57 (0.48, 0.68)    |
|                                             |                    | Sex: Male                         | 0.68 (0.57, 0.81) | 0.74 (0.62, 0.88) | 0.70 (0.61, 0.80) | 0.64 (0.58, 0.72) | 0.53 (0.44, 0.65)    |
| Doses 1&2: BNT-162b2;<br>Booster: mRNA-1273 | Composite arterial | Age group: <40                    |                   | 0.38 (0.21, 0.69) |                   | 0.19 (0.07, 0.53) |                      |
|                                             |                    | Age group: 40-59                  | 0.63 (0.42, 0.94) | 0.96 (0.68, 1.34) | 0.83 (0.63, 1.09) | 0.79 (0.61, 1.01) | 13.78 (1.83, 103.78) |
|                                             |                    | Age group: 60-79                  |                   | 0.70 (0.61, 0.82) |                   | 0.65 (0.55, 0.78) |                      |
|                                             |                    | Age group: >=80                   | 0.81 (0.54, 1.22) | 0.95 (0.65, 1.40) | 0.68 (0.49, 0.96) | 0.67 (0.51, 0.87) | 0.94 (0.23, 3.85)    |
|                                             |                    | Ethnicity: White                  | 0.68 (0.55, 0.84) | 0.93 (0.77, 1.12) | 0.88 (0.76, 1.02) | 0.85 (0.75, 0.96) | 1.19 (0.37, 3.80)    |
|                                             |                    | Ethnicity: Black or Black British |                   | 1.07 (0.50, 2.28) |                   | 1.33 (0.57, 3.10) |                      |
|                                             |                    | Ethnicity: Asian or Asian British |                   | 0.83 (0.53, 1.32) |                   | 0.70 (0.38, 1.30) |                      |
|                                             |                    | Ethnicity: Other Ethnic Groups    |                   | 1.31 (0.53, 3.25) |                   | 1.68 (0.57, 4.90) |                      |
|                                             |                    | Ethnicity: Mixed                  |                   | 2.13 (0.74, 6.14) |                   | 1.28 (0.26, 6.24) |                      |
|                                             |                    | Ethnicity: Unknown                |                   | 0.54 (0.19, 1.56) |                   | 0.11 (0.01, 0.96) |                      |
|                                             |                    | No prior history of COVID-19      | 0.68 (0.55, 0.83) | 0.96 (0.80, 1.15) | 0.88 (0.76, 1.01) | 0.85 (0.75, 0.96) | 1.12 (0.35, 3.59)    |
|                                             |                    | Prior history of COVID-19         |                   | 1.21 (0.79, 1.86) |                   | 0.96 (0.53, 1.75) |                      |
|                                             |                    | No prior history of event         | 0.59 (0.45, 0.78) | 0.86 (0.68, 1.09) | 0.82 (0.69, 0.98) | 0.72 (0.62, 0.85) | 1.21 (0.38, 3.91)    |
|                                             |                    | Prior history of event            |                   | 0.83 (0.71, 0.96) |                   | 0.81 (0.68, 0.97) |                      |
|                                             |                    | Sex: Female                       | 0.62 (0.44, 0.87) | 0.58 (0.41, 0.83) | 0.80 (0.63, 1.00) | 0.67 (0.54, 0.82) | 1.30 (0.30, 5.51)    |
|                                             |                    | Sex: Male                         | 0.69 (0.54, 0.89) | 1.20 (0.99, 1.47) | 0.93 (0.78, 1.10) | 0.97 (0.83, 1.13) | 0.80 (0.11, 5.80)    |
|                                             | Composite venous   | Age group: <40                    |                   | 0.94 (0.61, 1.45) |                   | 0.85 (0.37, 1.94) |                      |
|                                             |                    | Age group: 40-59                  |                   | 0.60 (0.39, 0.93) |                   | 0.57 (0.35, 0.93) |                      |
|                                             |                    | Age group: 60-79                  |                   | 0.39 (0.28, 0.56) |                   | 0.44 (0.30, 0.65) |                      |
|                                             |                    | Age group: >=80                   |                   | 0.52 (0.30, 0.90) |                   | 0.31 (0.15, 0.65) |                      |
|                                             |                    | Ethnicity: White                  |                   | 0.60 (0.48, 0.75) |                   | 0.58 (0.45, 0.76) |                      |
|                                             |                    | Ethnicity: Black or Black British |                   | 0.32 (0.04, 2.48) |                   | 0.77 (0.17, 3.42) |                      |
|                                             |                    | Ethnicity: Asian or Asian British |                   | 0.83 (0.25, 2.78) |                   | 0.40 (0.06, 2.68) |                      |
|                                             |                    | Ethnicity: Other Ethnic Groups    |                   | 0.92 (0.18, 4.69) |                   | 0.58 (0.05, 6.45) |                      |
|                                             |                    | Ethnicity: Mixed                  |                   | 0.61 (0.49, 0.75) |                   | 0.57 (0.44, 0.73) |                      |
|                                             |                    | Ethnicity: Unknown                |                   | 0.39 (0.12, 1.28) |                   | 0.21 (0.03, 1.47) |                      |
|                                             |                    | No prior history of COVID-19      |                   | 0.61 (0.49, 0.76) |                   | 0.54 (0.42, 0.71) |                      |
|                                             |                    | Prior history of COVID-19         |                   | 0.54 (0.31, 0.95) |                   | 0.54 (0.27, 1.08) |                      |
|                                             |                    | No prior history of event         |                   | 0.62 (0.47, 0.81) |                   | 0.67 (0.48, 0.93) |                      |
|                                             |                    | Prior history of event            |                   | 0.61 (0.44, 0.83) |                   | 0.48 (0.32, 0.71) |                      |
|                                             |                    | Sex: Female                       |                   | 0.94 (0.61, 1.45) |                   | 0.85 (0.37, 1.94) |                      |
|                                             |                    | Sex: Male                         |                   | 0.60 (0.39, 0.93) |                   | 0.57 (0.35, 0.93) |                      |

<sup>10</sup> Stratified analyses for primary course mRNA-1273 are not presented, nor are booster with mRNA-1273 only, due to the small number of individuals who received mRNA-1273.

Supplementary Table 30: Associations of COVID-19 vaccination brand and dose with myocarditis and pericarditis until the CDC's Announcement on 17 May 2021.

| Event               | Vaccination course              | Week 1            | Week 2            | Weeks 3-4         | Weeks 5-12        | Weeks 13-24       |
|---------------------|---------------------------------|-------------------|-------------------|-------------------|-------------------|-------------------|
|                     |                                 |                   |                   |                   |                   | Week 5-24         |
| <b>Myocarditis</b>  | <b>Dose 1: ChAdOx1</b>          | 1.42 (0.83, 2.45) | 0.53 (0.23, 1.21) | 1.13 (0.72, 1.76) | 0.77 (0.52, 1.12) | 0.69 (0.32, 1.46) |
|                     | <b>Dose 1: BNT-162b2</b>        | 1.85 (0.92, 3.72) | 1.20 (0.52, 2.74) | 0.87 (0.43, 1.76) | 0.74 (0.47, 1.17) | 0.74 (0.38, 1.46) |
|                     | <b>Doses 1&amp;2: ChAdOx1</b>   | 0.55 (0.14, 2.20) | 0.64 (0.15, 2.73) | 0.76 (0.22, 2.55) |                   | 1.15 (0.23, 5.77) |
|                     | <b>Doses 1&amp;2: BNT-162b2</b> | 0.95 (0.27, 3.38) | 1.41 (0.42, 4.76) | 0.60 (0.17, 2.08) |                   | 1.21 (0.41, 3.54) |
| <b>Pericarditis</b> | <b>Dose 1: ChAdOx1</b>          | 0.88 (0.44, 1.74) | 1.57 (0.92, 2.68) | 1.21 (0.76, 1.93) | 1.08 (0.76, 1.54) | 0.65 (0.31, 1.34) |
|                     | <b>Dose 1: BNT-162b2</b>        | 0.43 (0.11, 1.78) | 0.95 (0.34, 2.64) | 1.19 (0.62, 2.30) | 1.15 (0.75, 1.76) | 1.89 (1.13, 3.16) |
|                     | <b>Doses 1&amp;2: ChAdOx1</b>   | 1.18 (0.51, 2.70) | 1.19 (0.48, 2.93) | 0.57 (0.22, 1.47) |                   | 0.41 (0.09, 1.82) |
|                     | <b>Doses 1&amp;2: BNT-162b2</b> | 0.31 (0.07, 1.33) | 1.23 (0.48, 3.12) | 1.35 (0.62, 2.97) |                   | 1.34 (0.63, 2.89) |

Supplementary Figure 1: Consort Flow Diagram for Population Inclusion/Exclusion Criteria<sup>11</sup>.

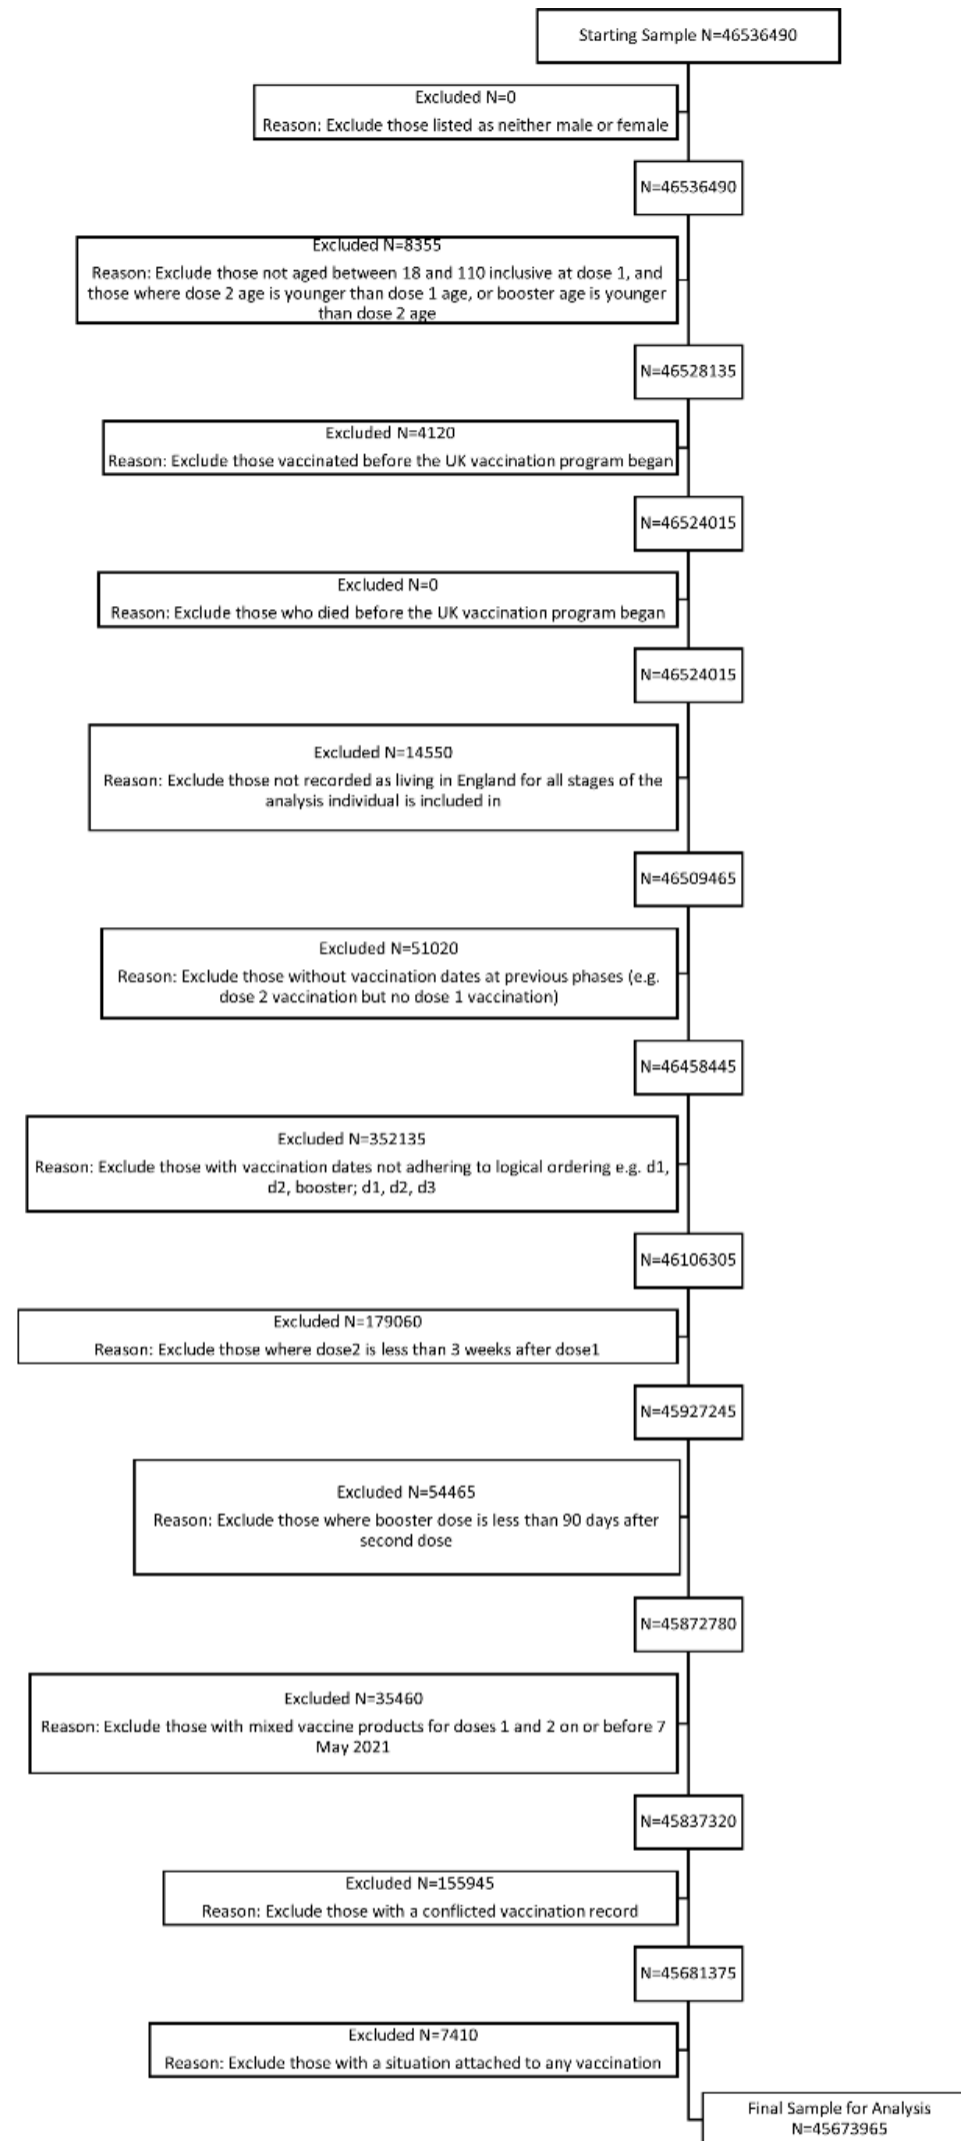

<sup>11</sup> Counts rounded to the nearest 5. Number excluded at each stage calculated from the rounded counts. 14,550 excluded due to having a latest non-NULL LSOA recorded as non-English, although latest LSOAs assigned as NULL (due to having no latest non-NULL LSOA on record, or due to having conflicting latest LSOAs) were included.



Supplementary Figure 2: Subgroup-specific maximally-adjusted hazard ratios for a composite arterial event by time since dose 1 vaccination.

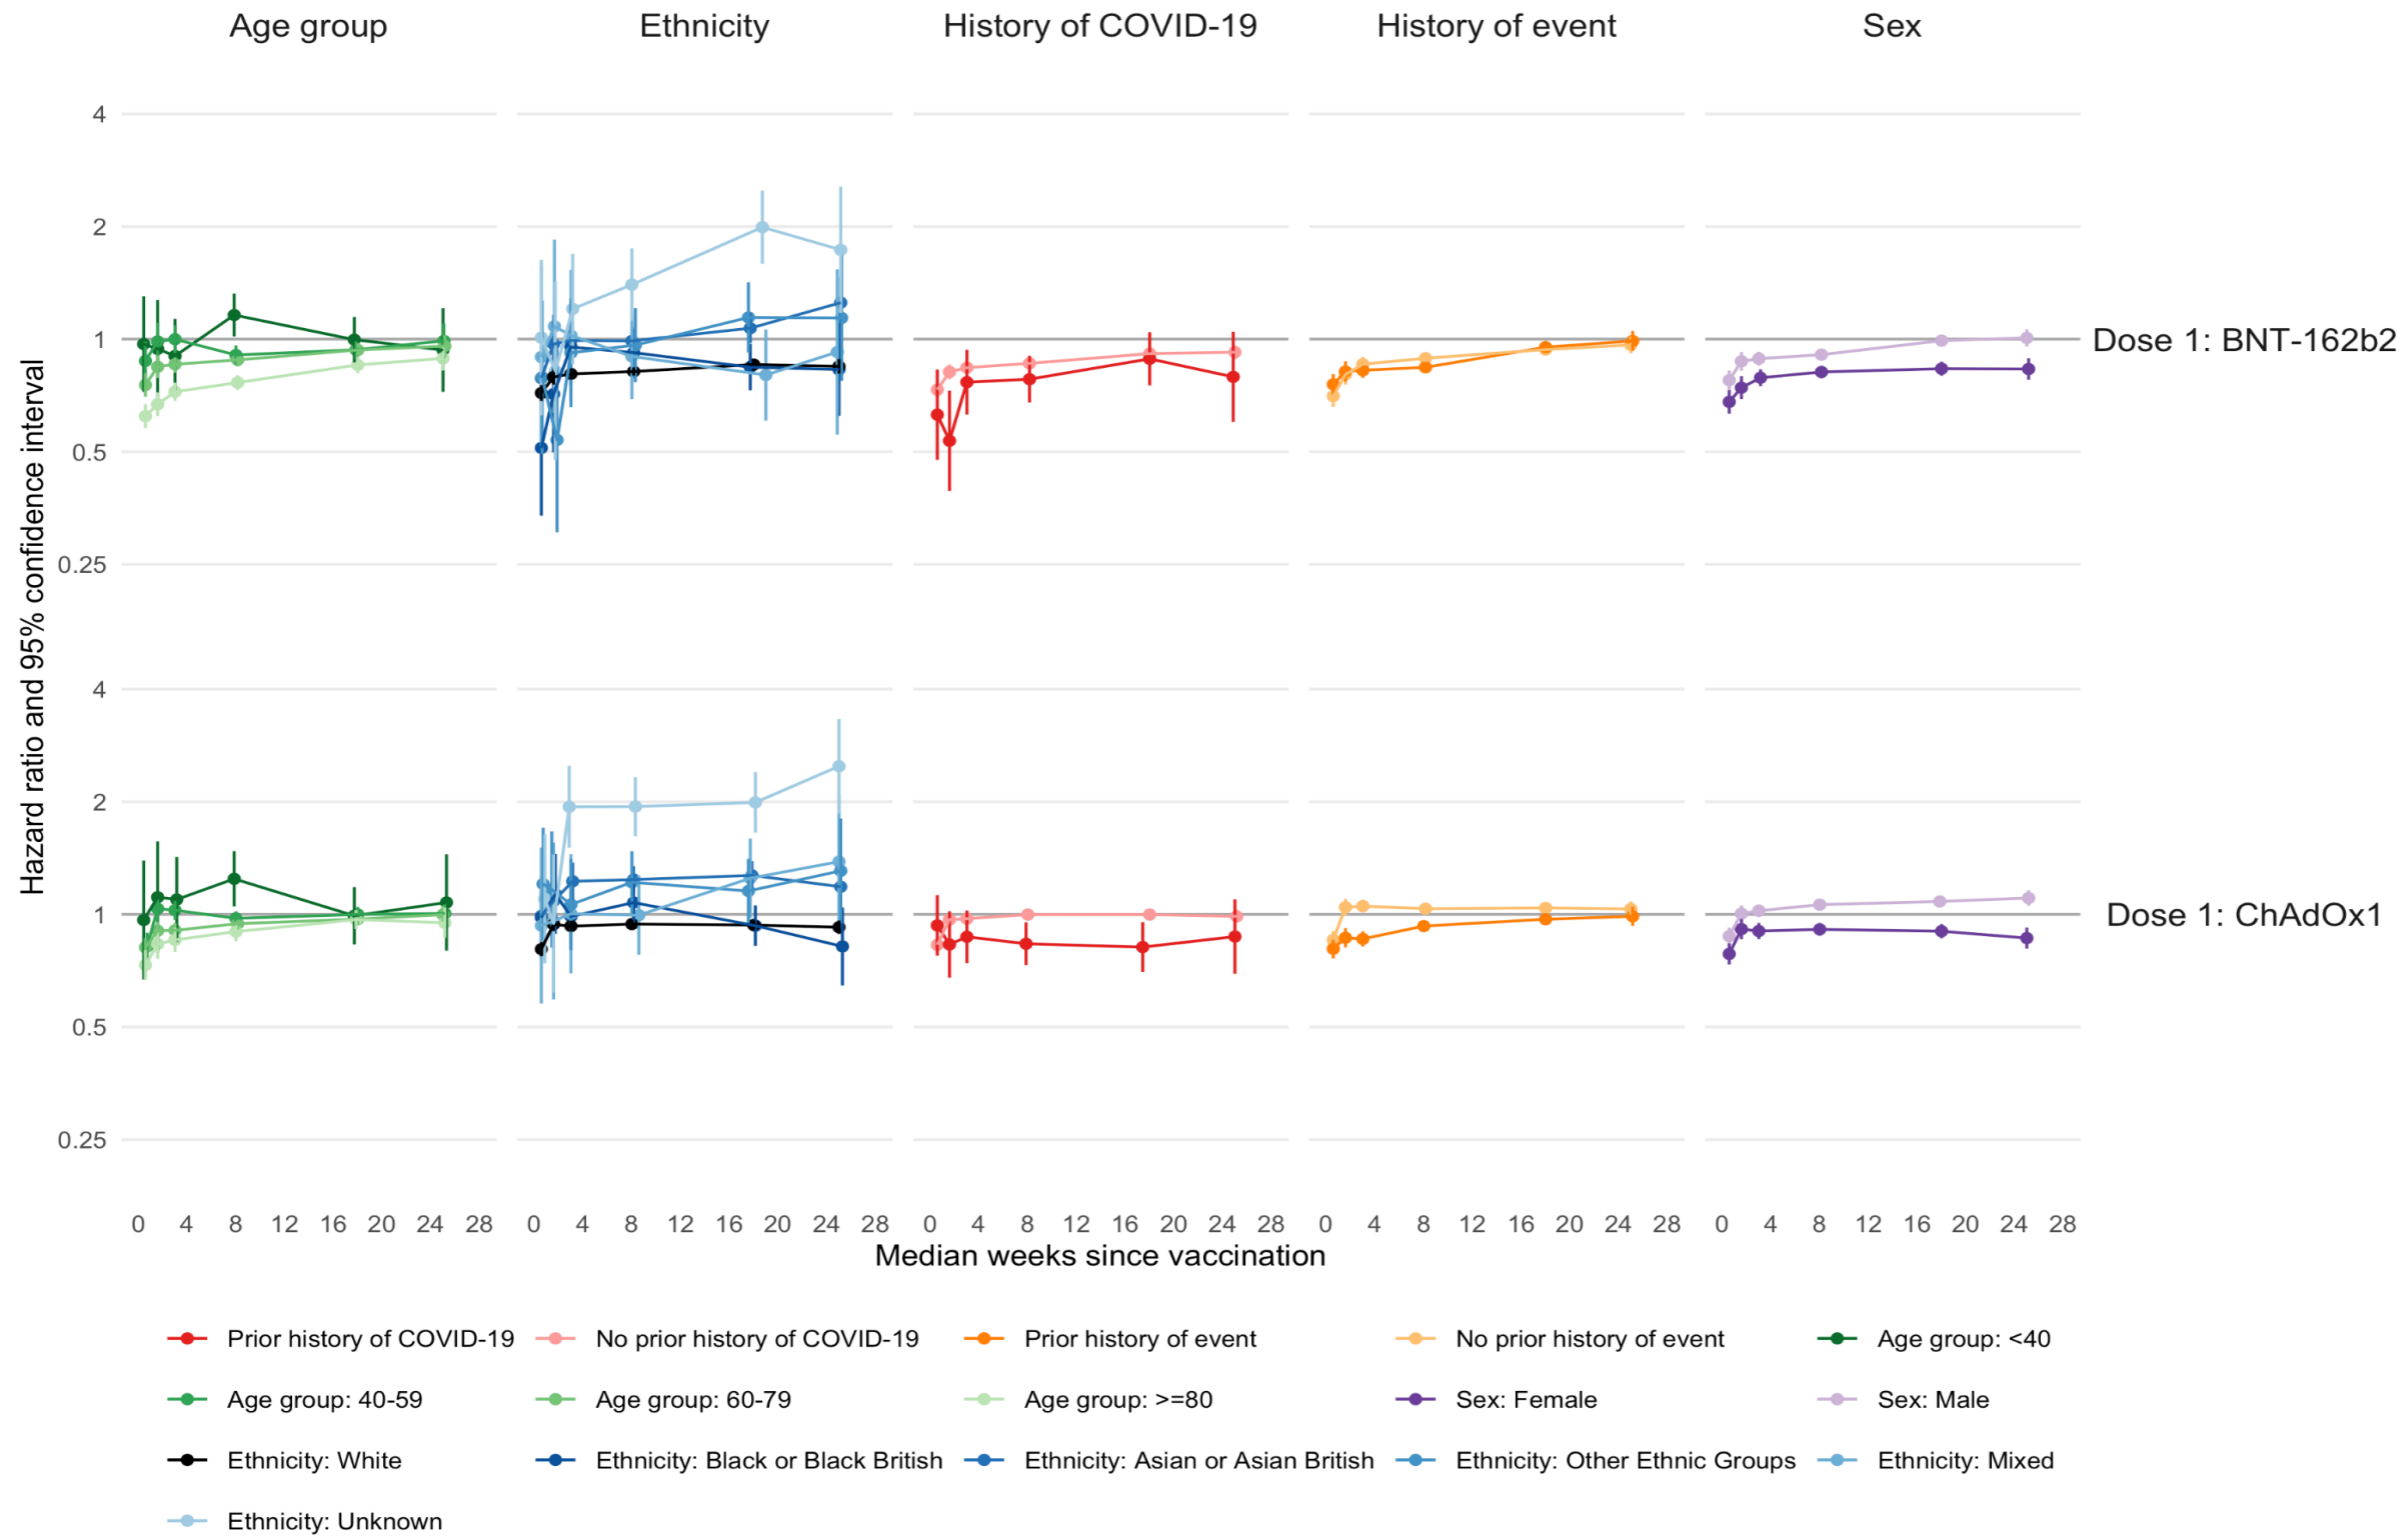

The number of people eligible for first dose analyses was 45,673,965.

The number of people who received a first dose of ChAdOx1, BNT-162b2 were 19,317,985 and 16,846,995 respectively.

The numerical values of hazard ratios and 95% CIs are displayed in Supplementary Tables 26.

Supplementary Figure 3: Subgroup-specific maximally-adjusted hazard ratios for a composite venous event by time since dose 1 vaccination.

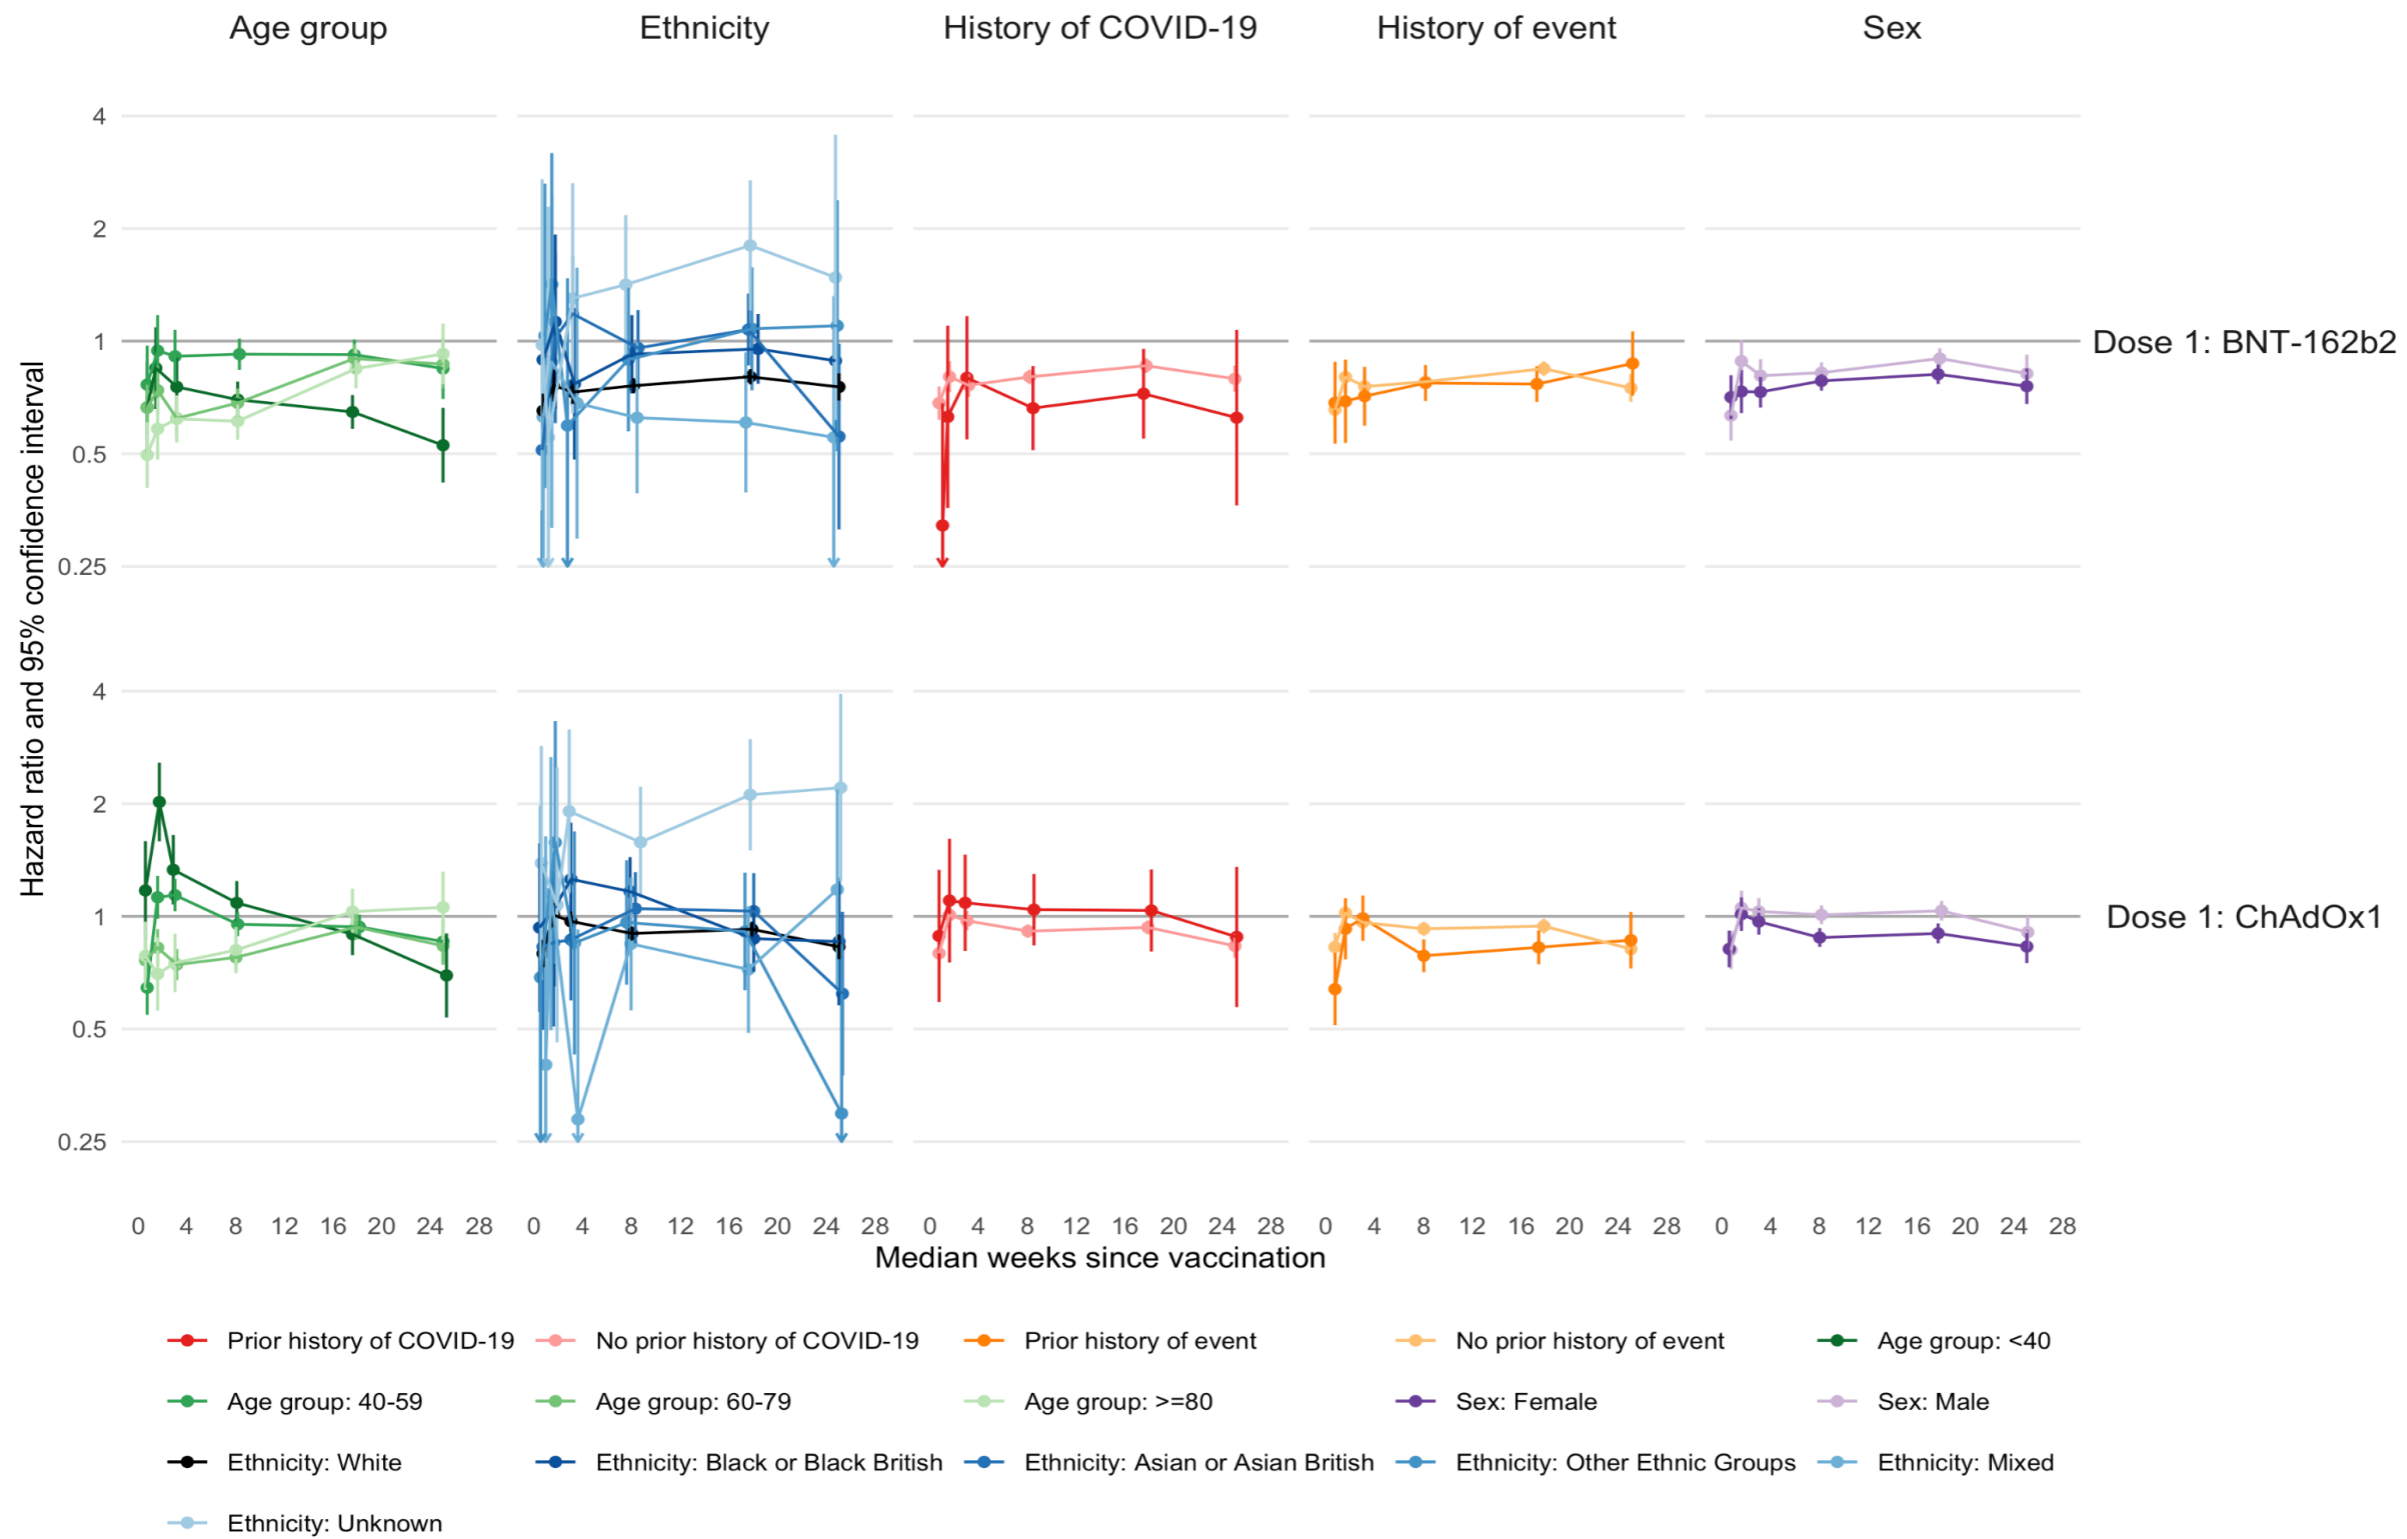

The number of people eligible for first dose analyses was 45,673,965.

The number of people who received a first dose of ChAdOx1, BNT-162b2 were 19,317,985 and 16,846,995 respectively.

The numerical values of hazard ratios and 95% CIs are displayed in Supplementary Tables 26.

Supplementary Figure 4: Subgroup-specific maximally-adjusted hazard ratios for a composite arterial event by time since second dose vaccination.

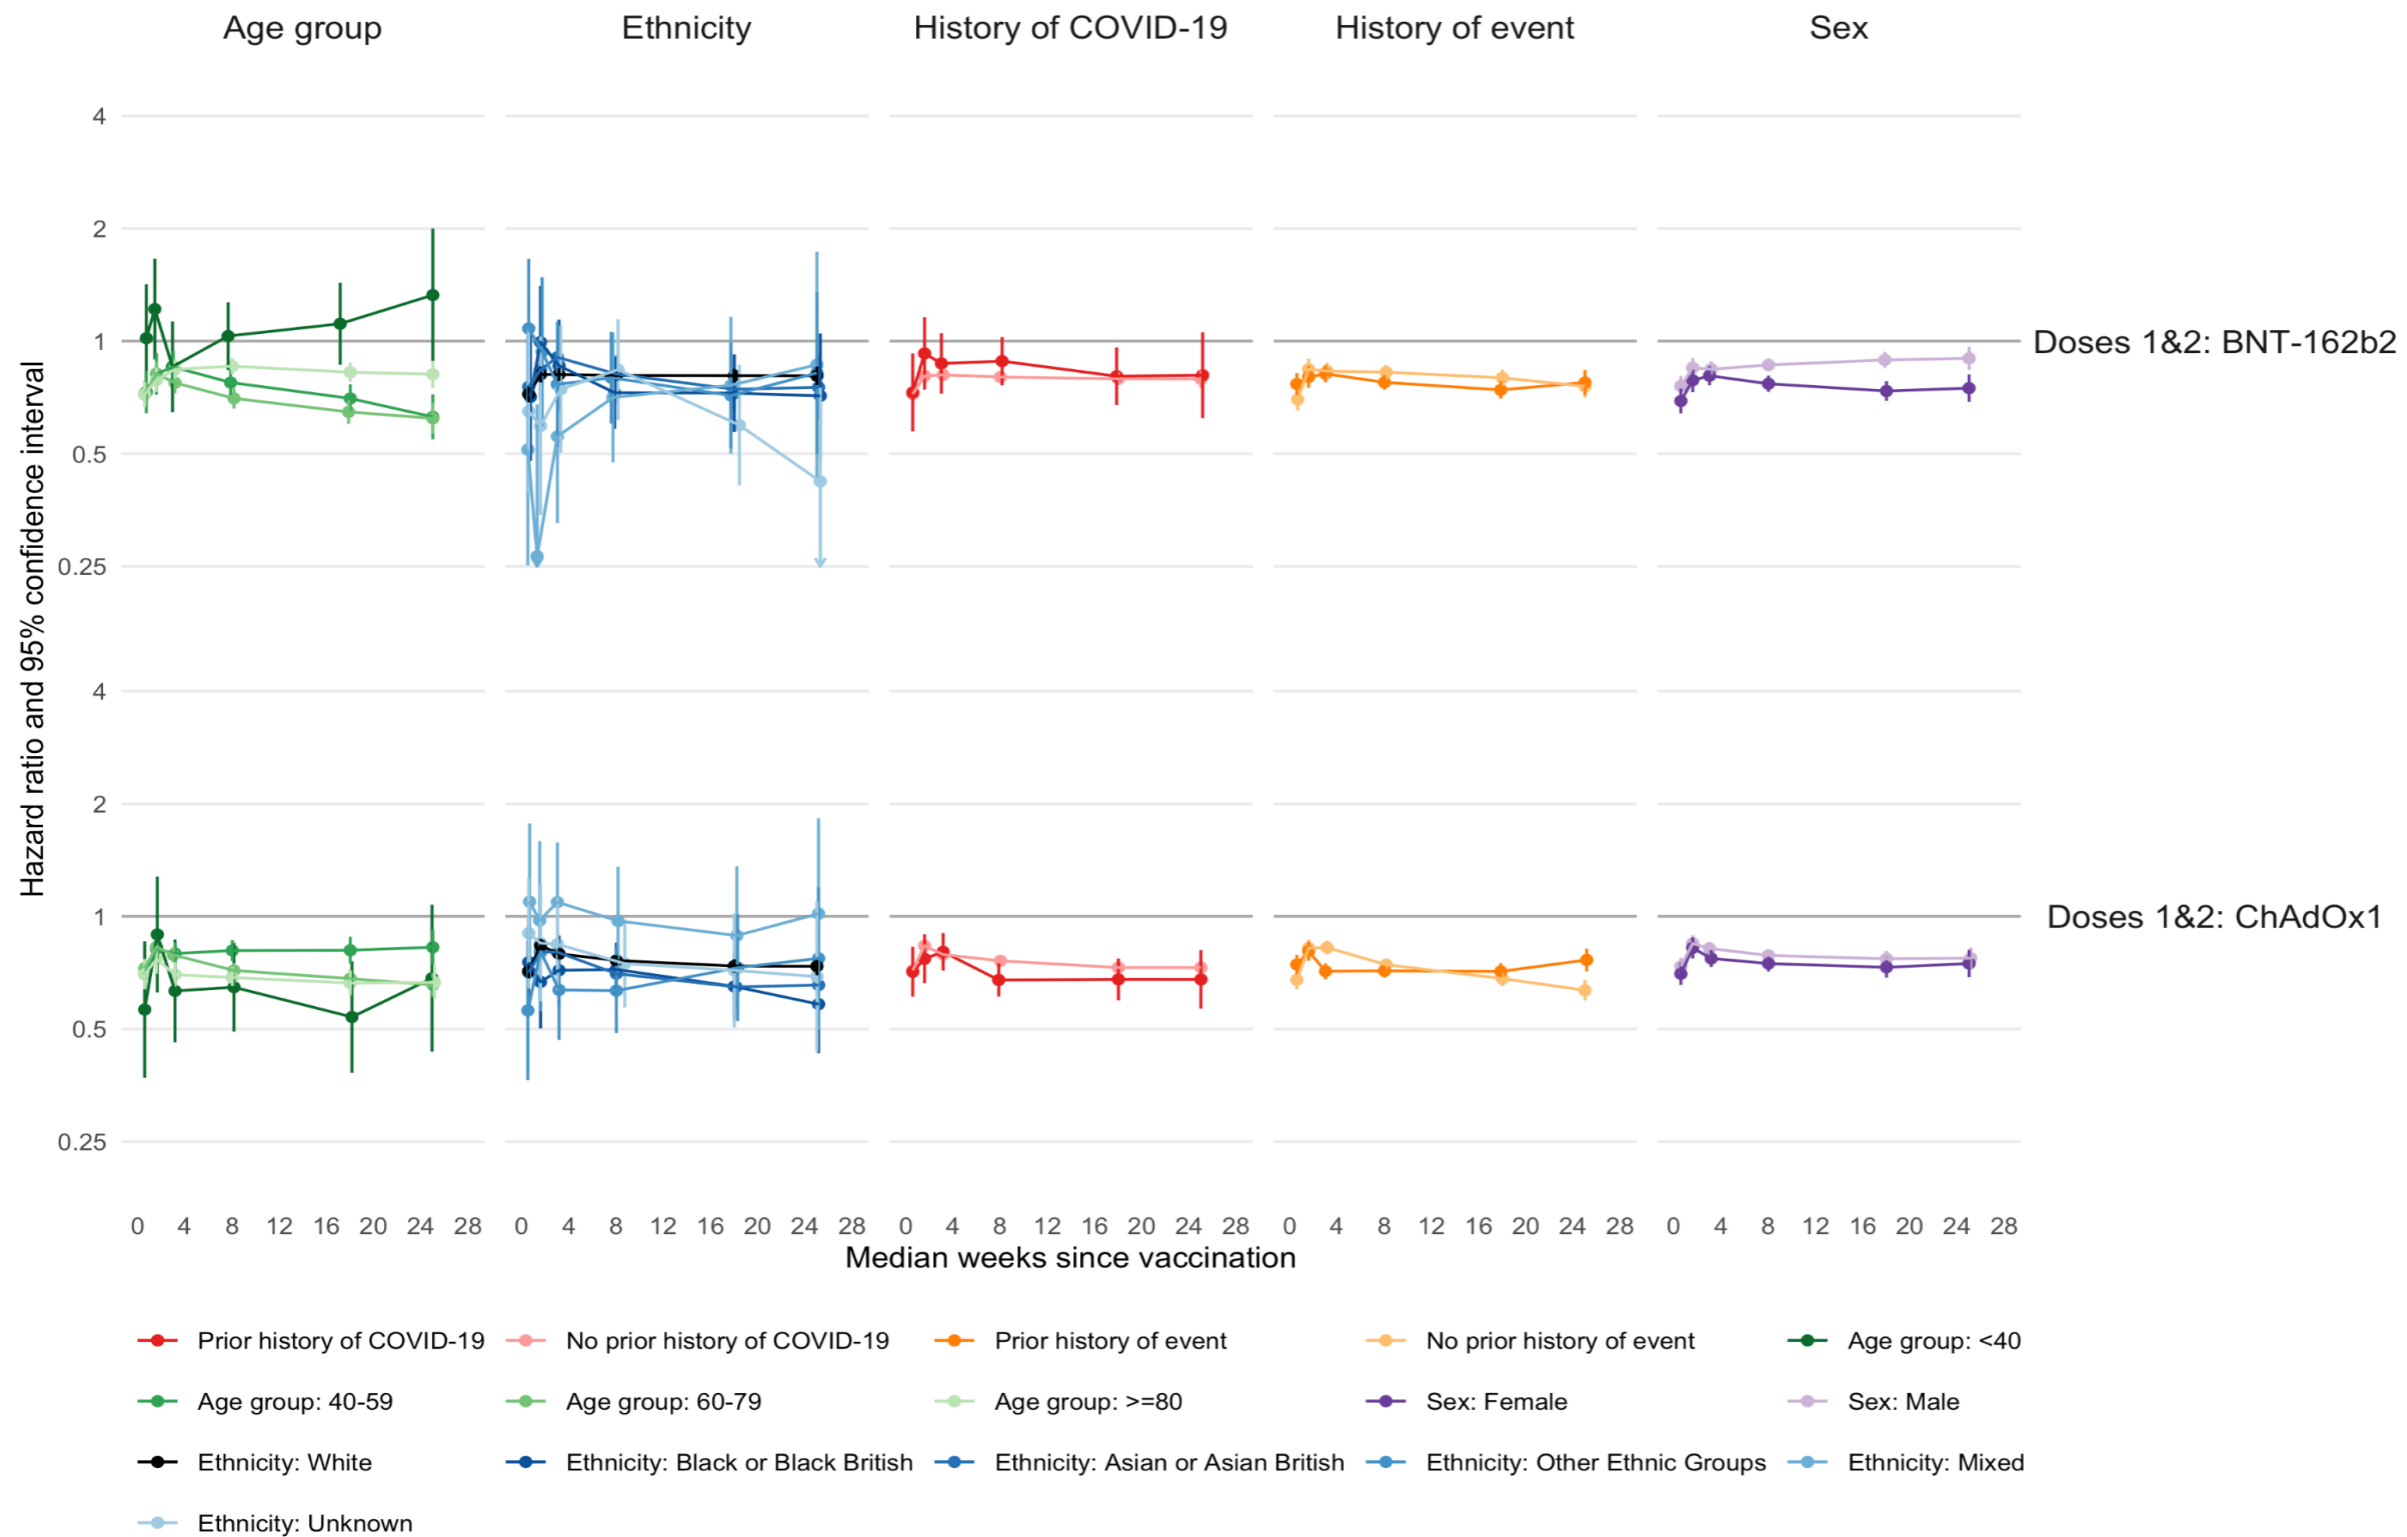

The number of people eligible for second dose analyses was 37,249,850.

The number of people who received a second dose of ChAdOx1, BNT-162b2 were 18,920,225 and 15,961,330 respectively.

The numerical values of hazard ratios and 95% CIs are displayed in Supplementary Tables 27

Supplementary Figure 5: Subgroup-specific maximally-adjusted hazard ratios for a composite venous event by time since second dose vaccination.

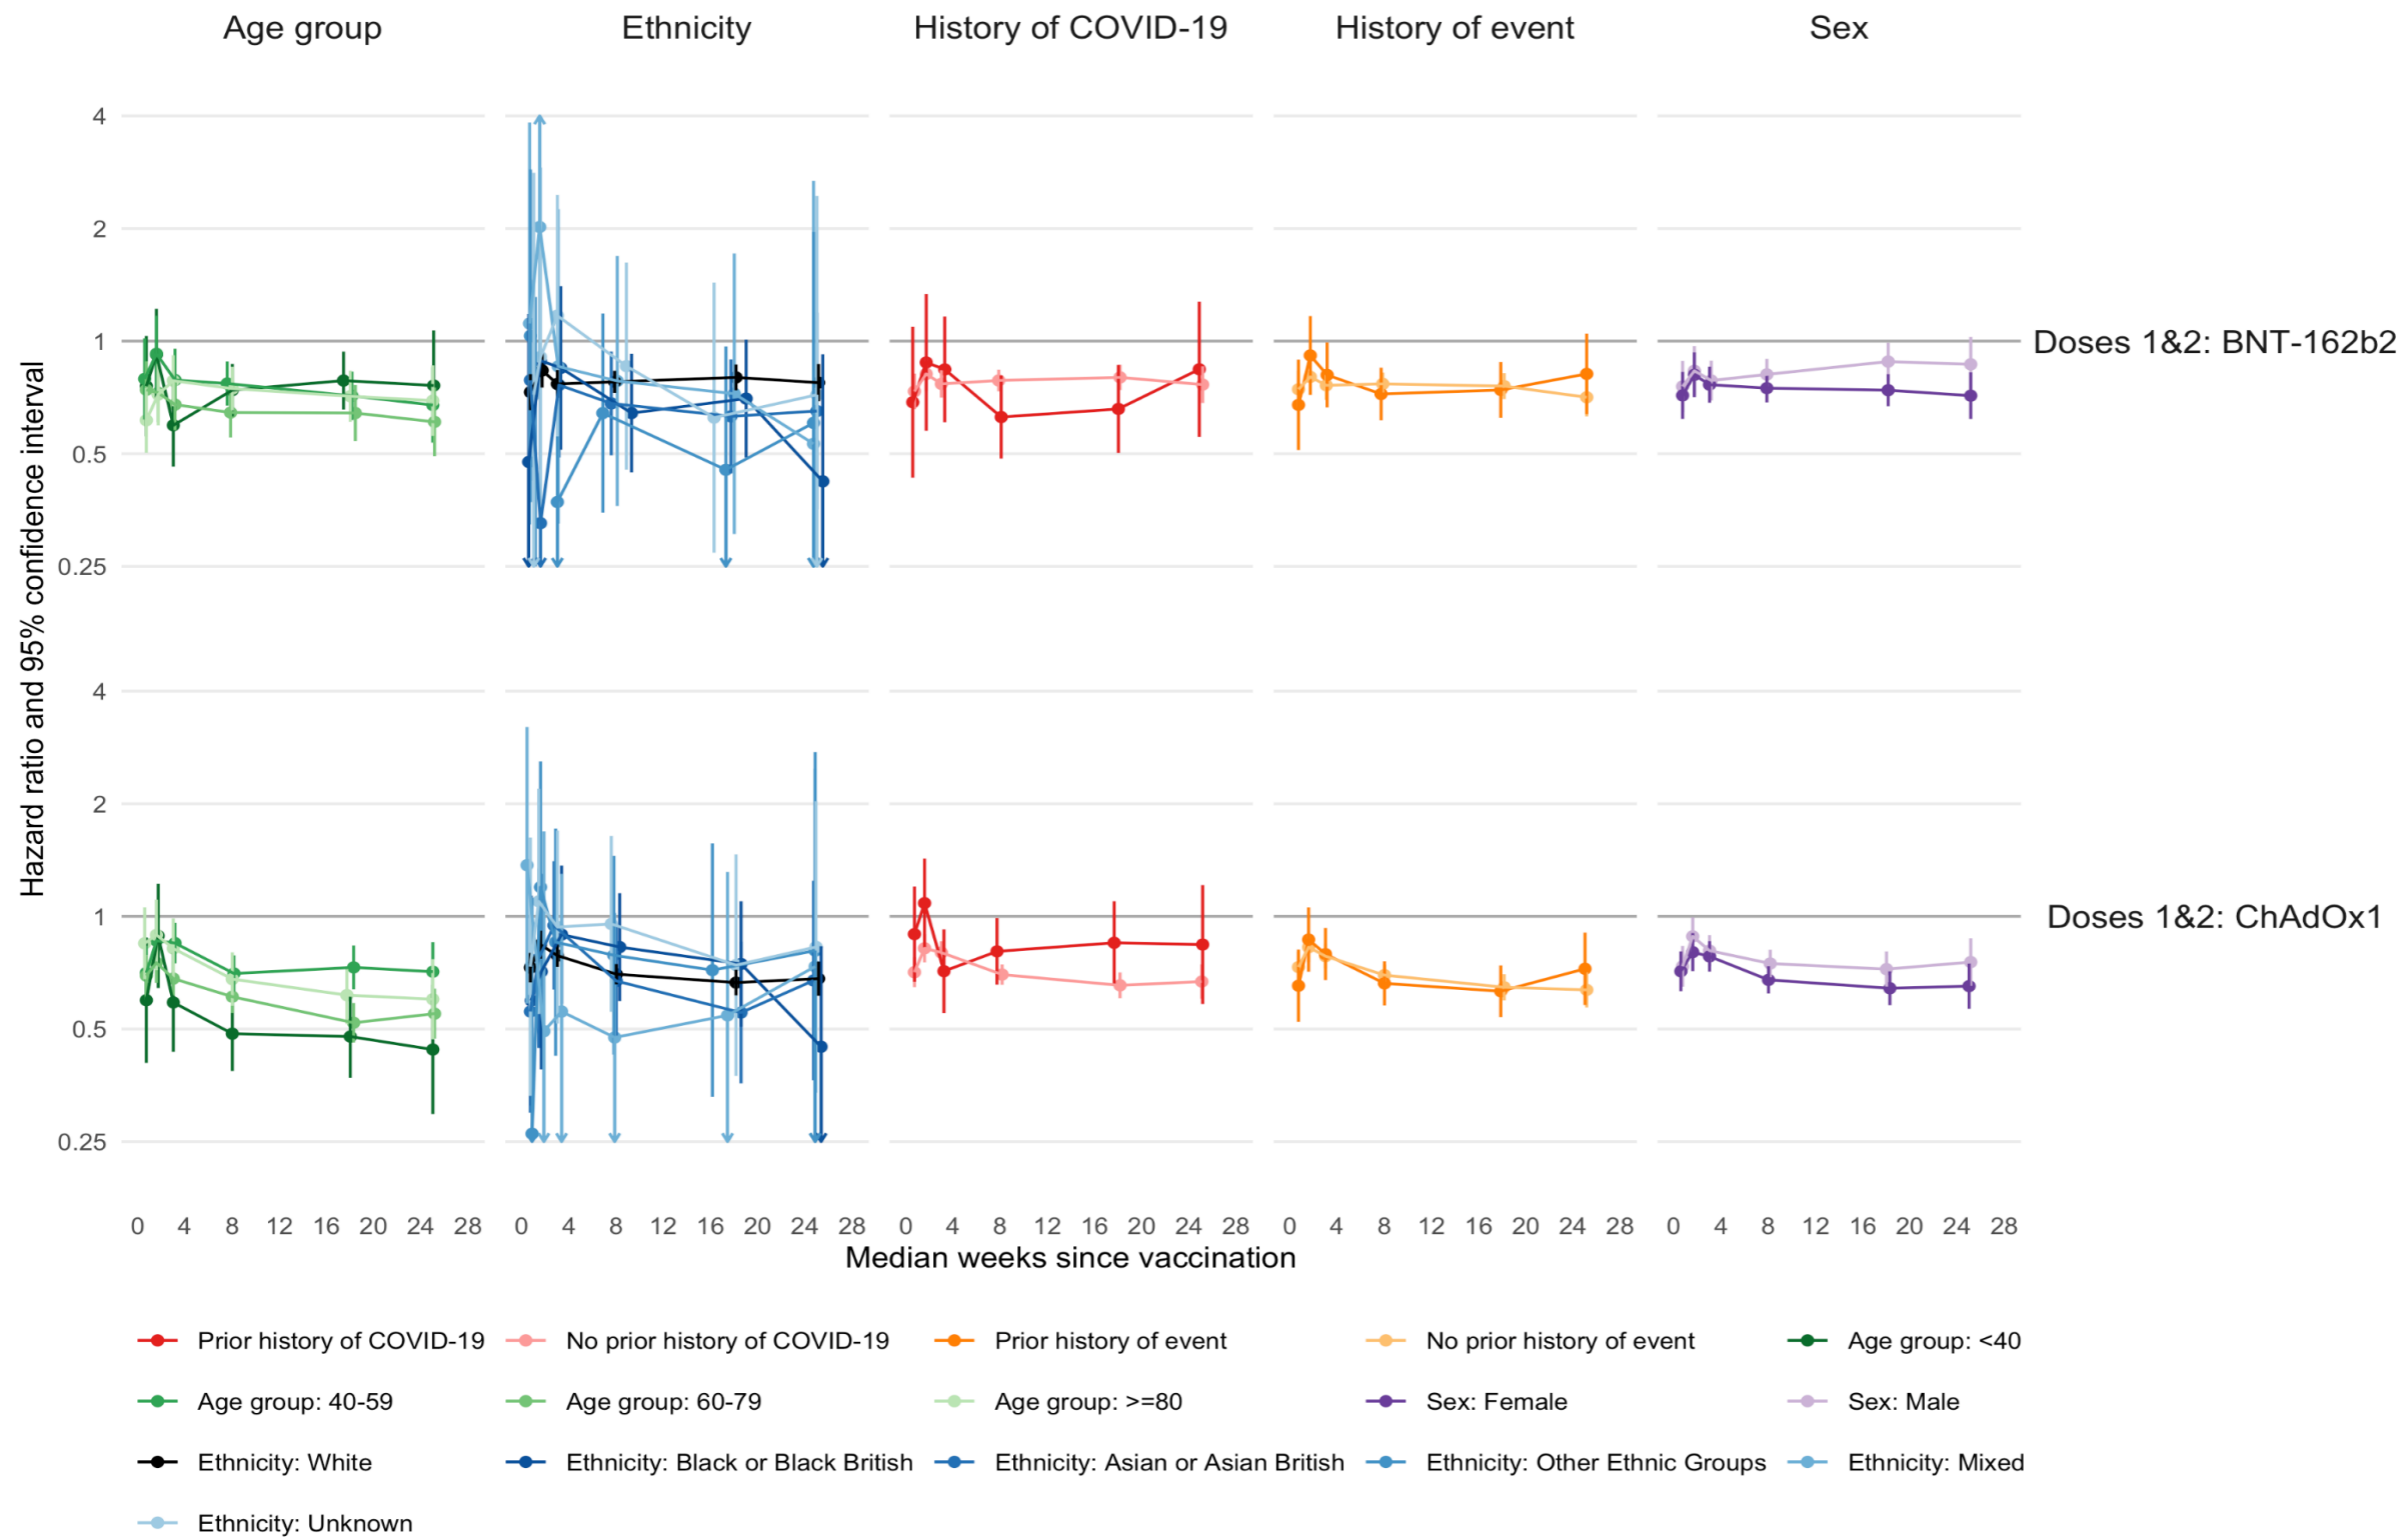

The number of people eligible for second dose analyses was 37,249,850.

The number of people who received a second dose of ChAdOx1, BNT-162b2 were 18,920,225 and 15,961,330 respectively.

The numerical values of hazard ratios and 95% CIs are displayed in Supplementary Tables 27.

Supplementary Figure 6: Subgroup-specific maximally-adjusted hazard ratios for a composite arterial event by time since booster vaccination<sup>12</sup>.

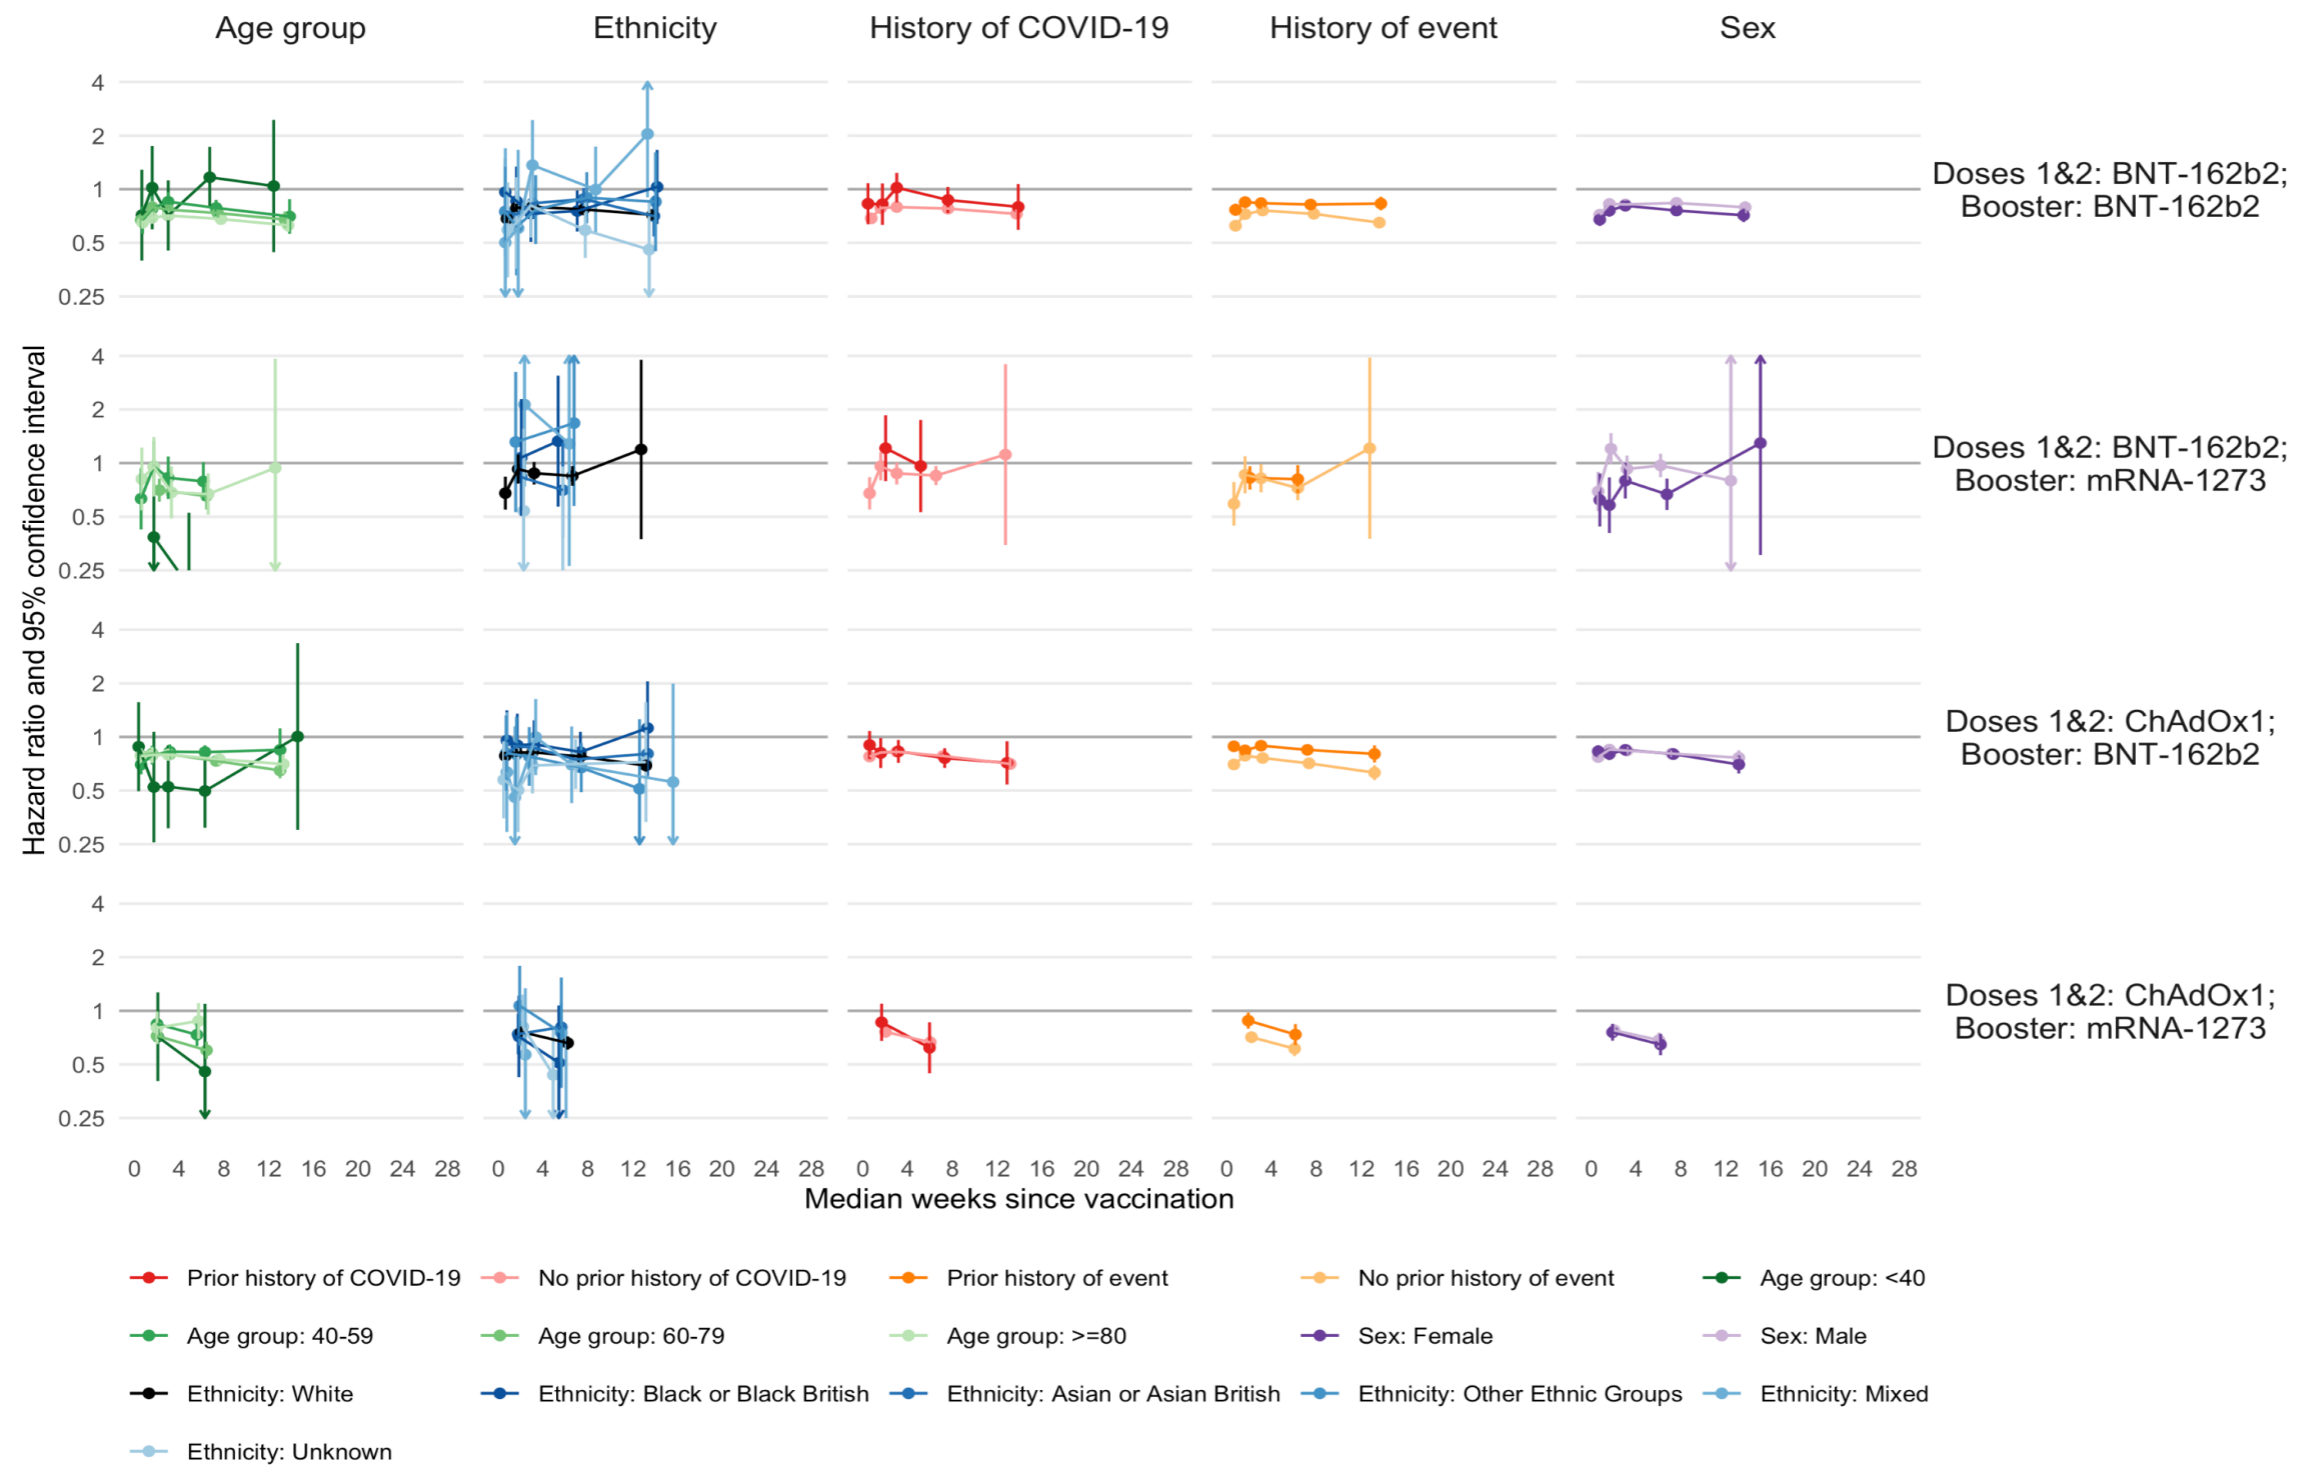

The number of people eligible for booster dose analyses was 35,853,120.

The number of people who received a booster dose of BNT-162b2 and mRNA-1273 following a primary course of ChAdOx1 were 11,964,635 and 4,153,760 respectively; a booster dose of BNT-162b2 and mRNA-1273 following a primary course of BNT-162b2 were 9,821,835 and 1,914,925 respectively.

The numerical values of hazard ratios and 95% CIs are displayed in Supplementary Tables 28, 29.

<sup>12</sup> The aHR for weeks 12-24 for Age group: 40-59, Doses 1&2: BNT-162b2/mRNA-1273; Booster: mRNA-1273 could not be estimated due to small counts.

Supplementary Figure 7: Subgroup-specific maximally-adjusted hazard ratios for a composite venous event by time since booster vaccination.

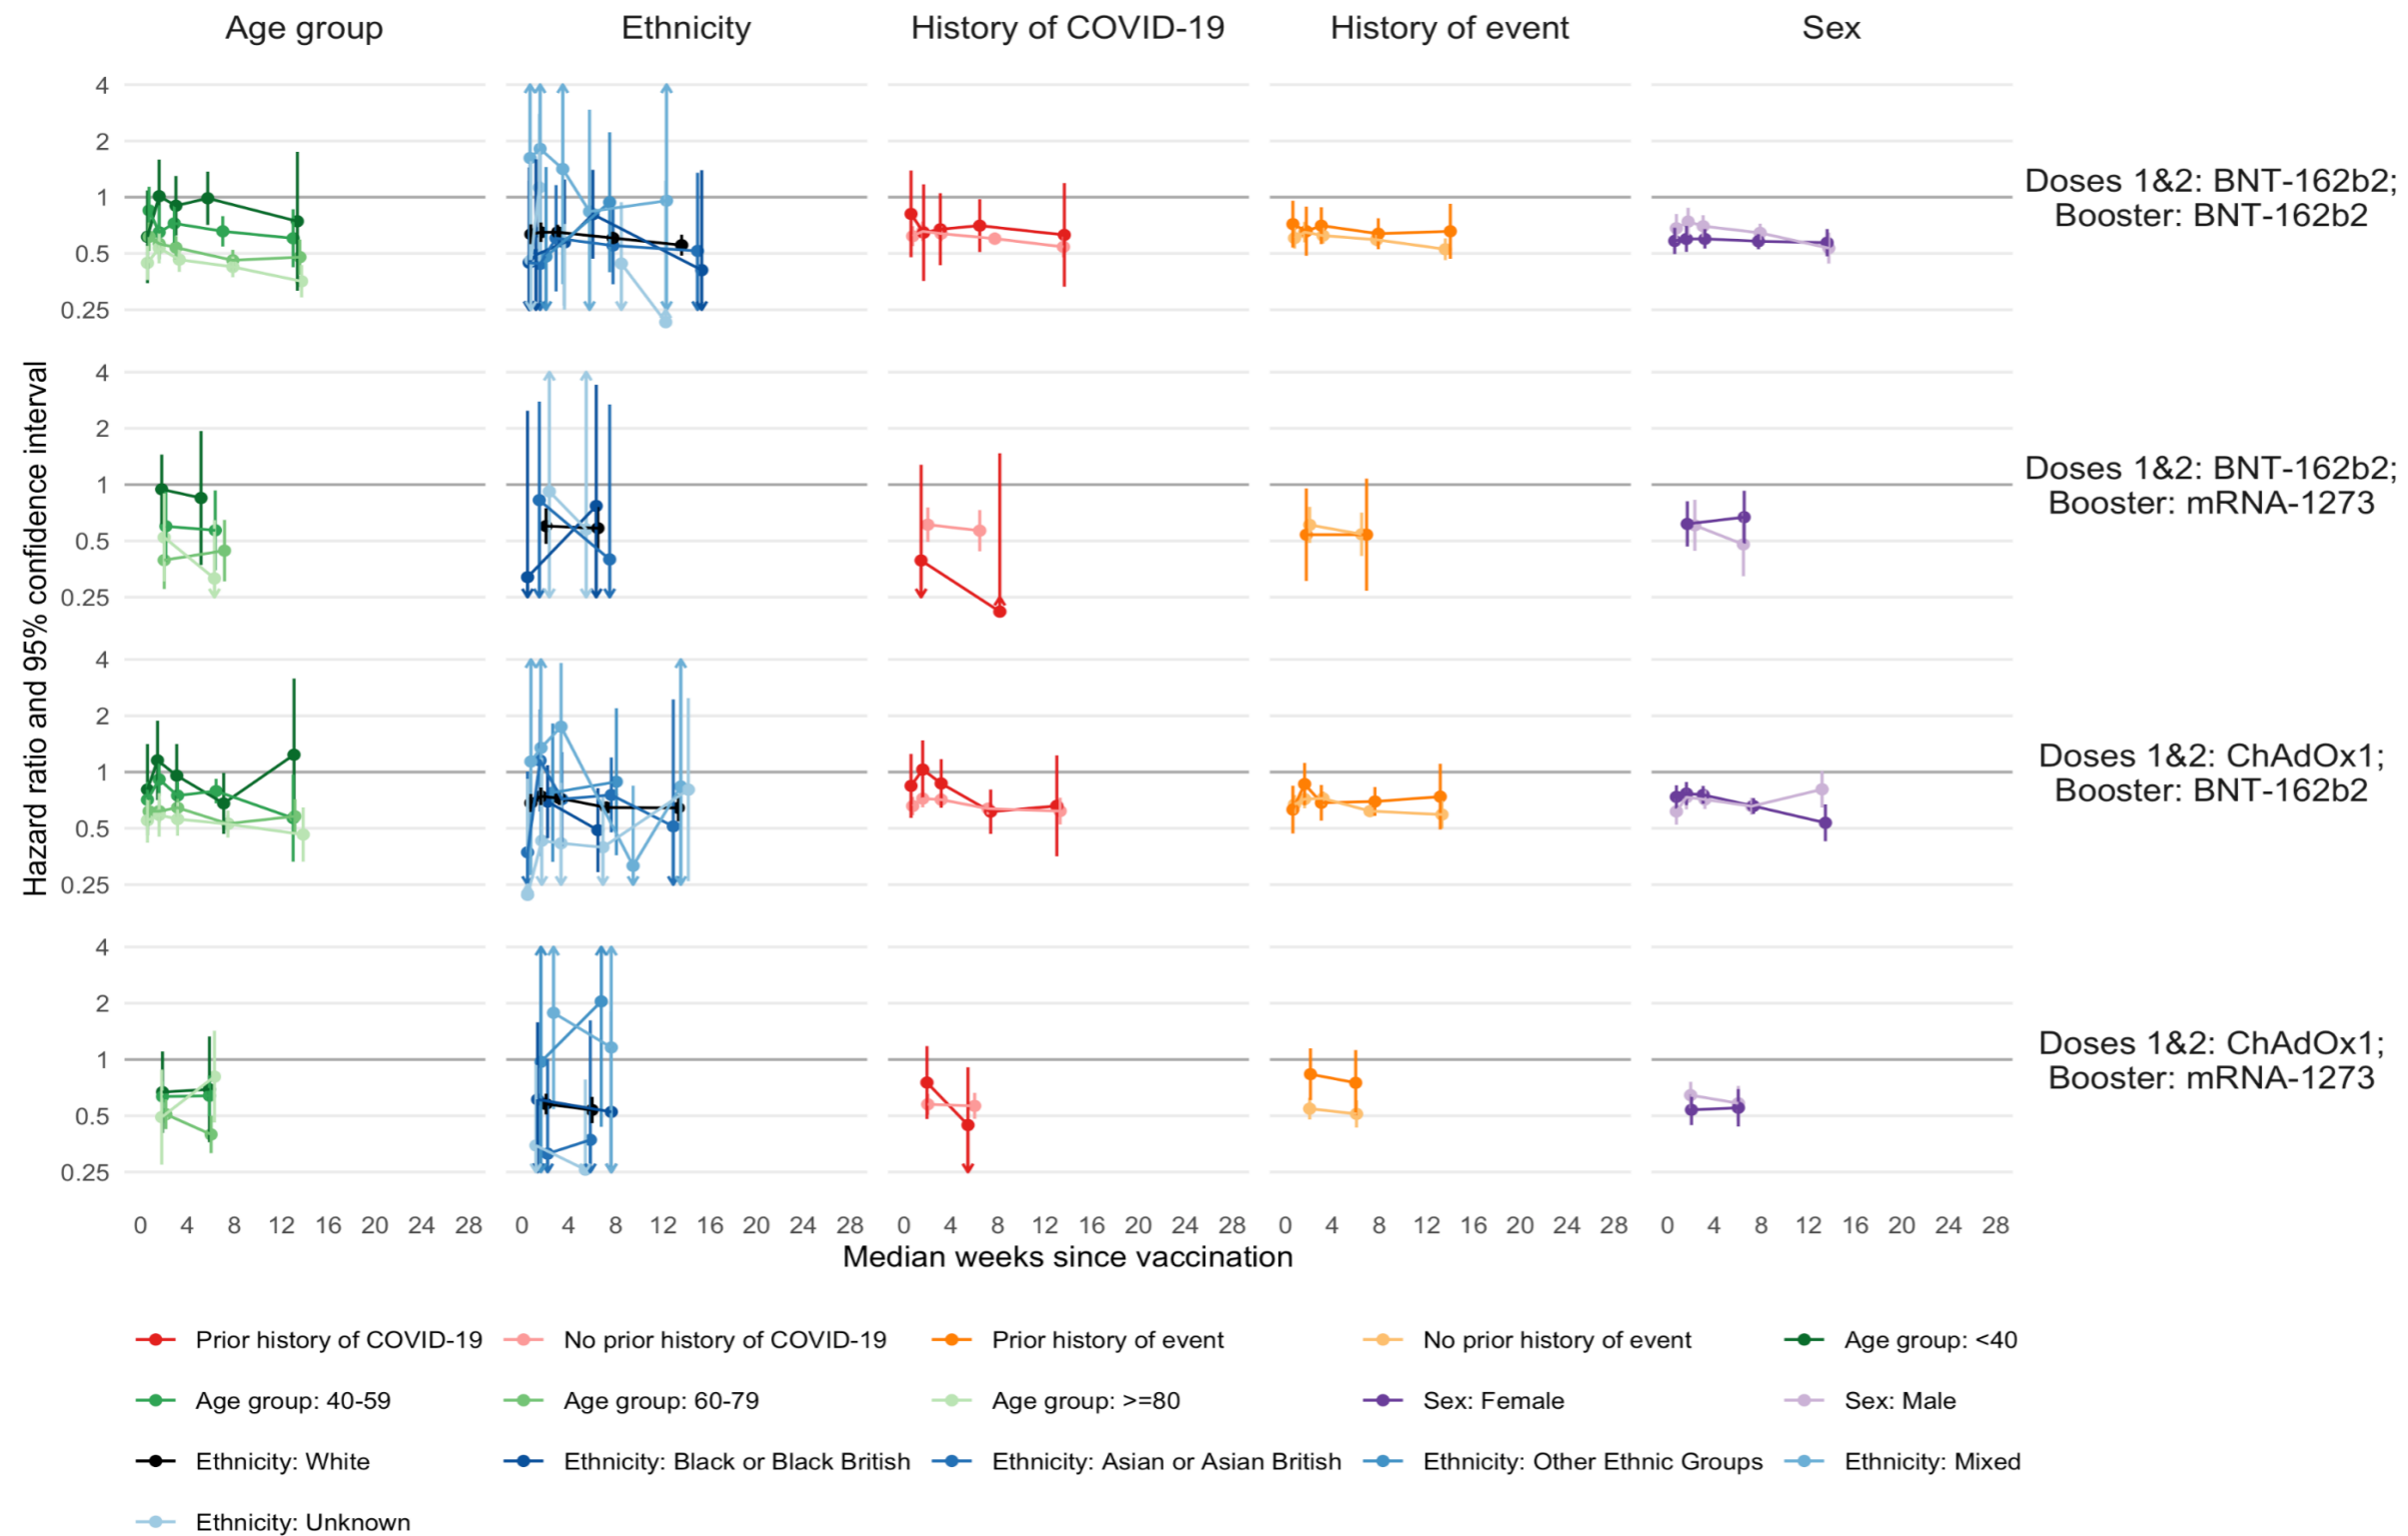

The number of people eligible booster dose analyses was 35,853,120.

The number of people who received a booster dose of BNT-162b2 and mRNA-1273 following a primary course of ChAdOx1 were 11,964,635 and 4,153,760 respectively; a booster dose of BNT-162b2 and mRNA-1273 following a primary course of BNT-162b2 were 9,821,835 and 1,914,925 respectively.

The numerical values of hazard ratios and 95% CIs are displayed in Supplementary Tables 28, 29.

Supplementary Figure 8: Associations of COVID-19 vaccination brand and dose with myocarditis and pericarditis until the CDC's Announcement on 17 May 2021.

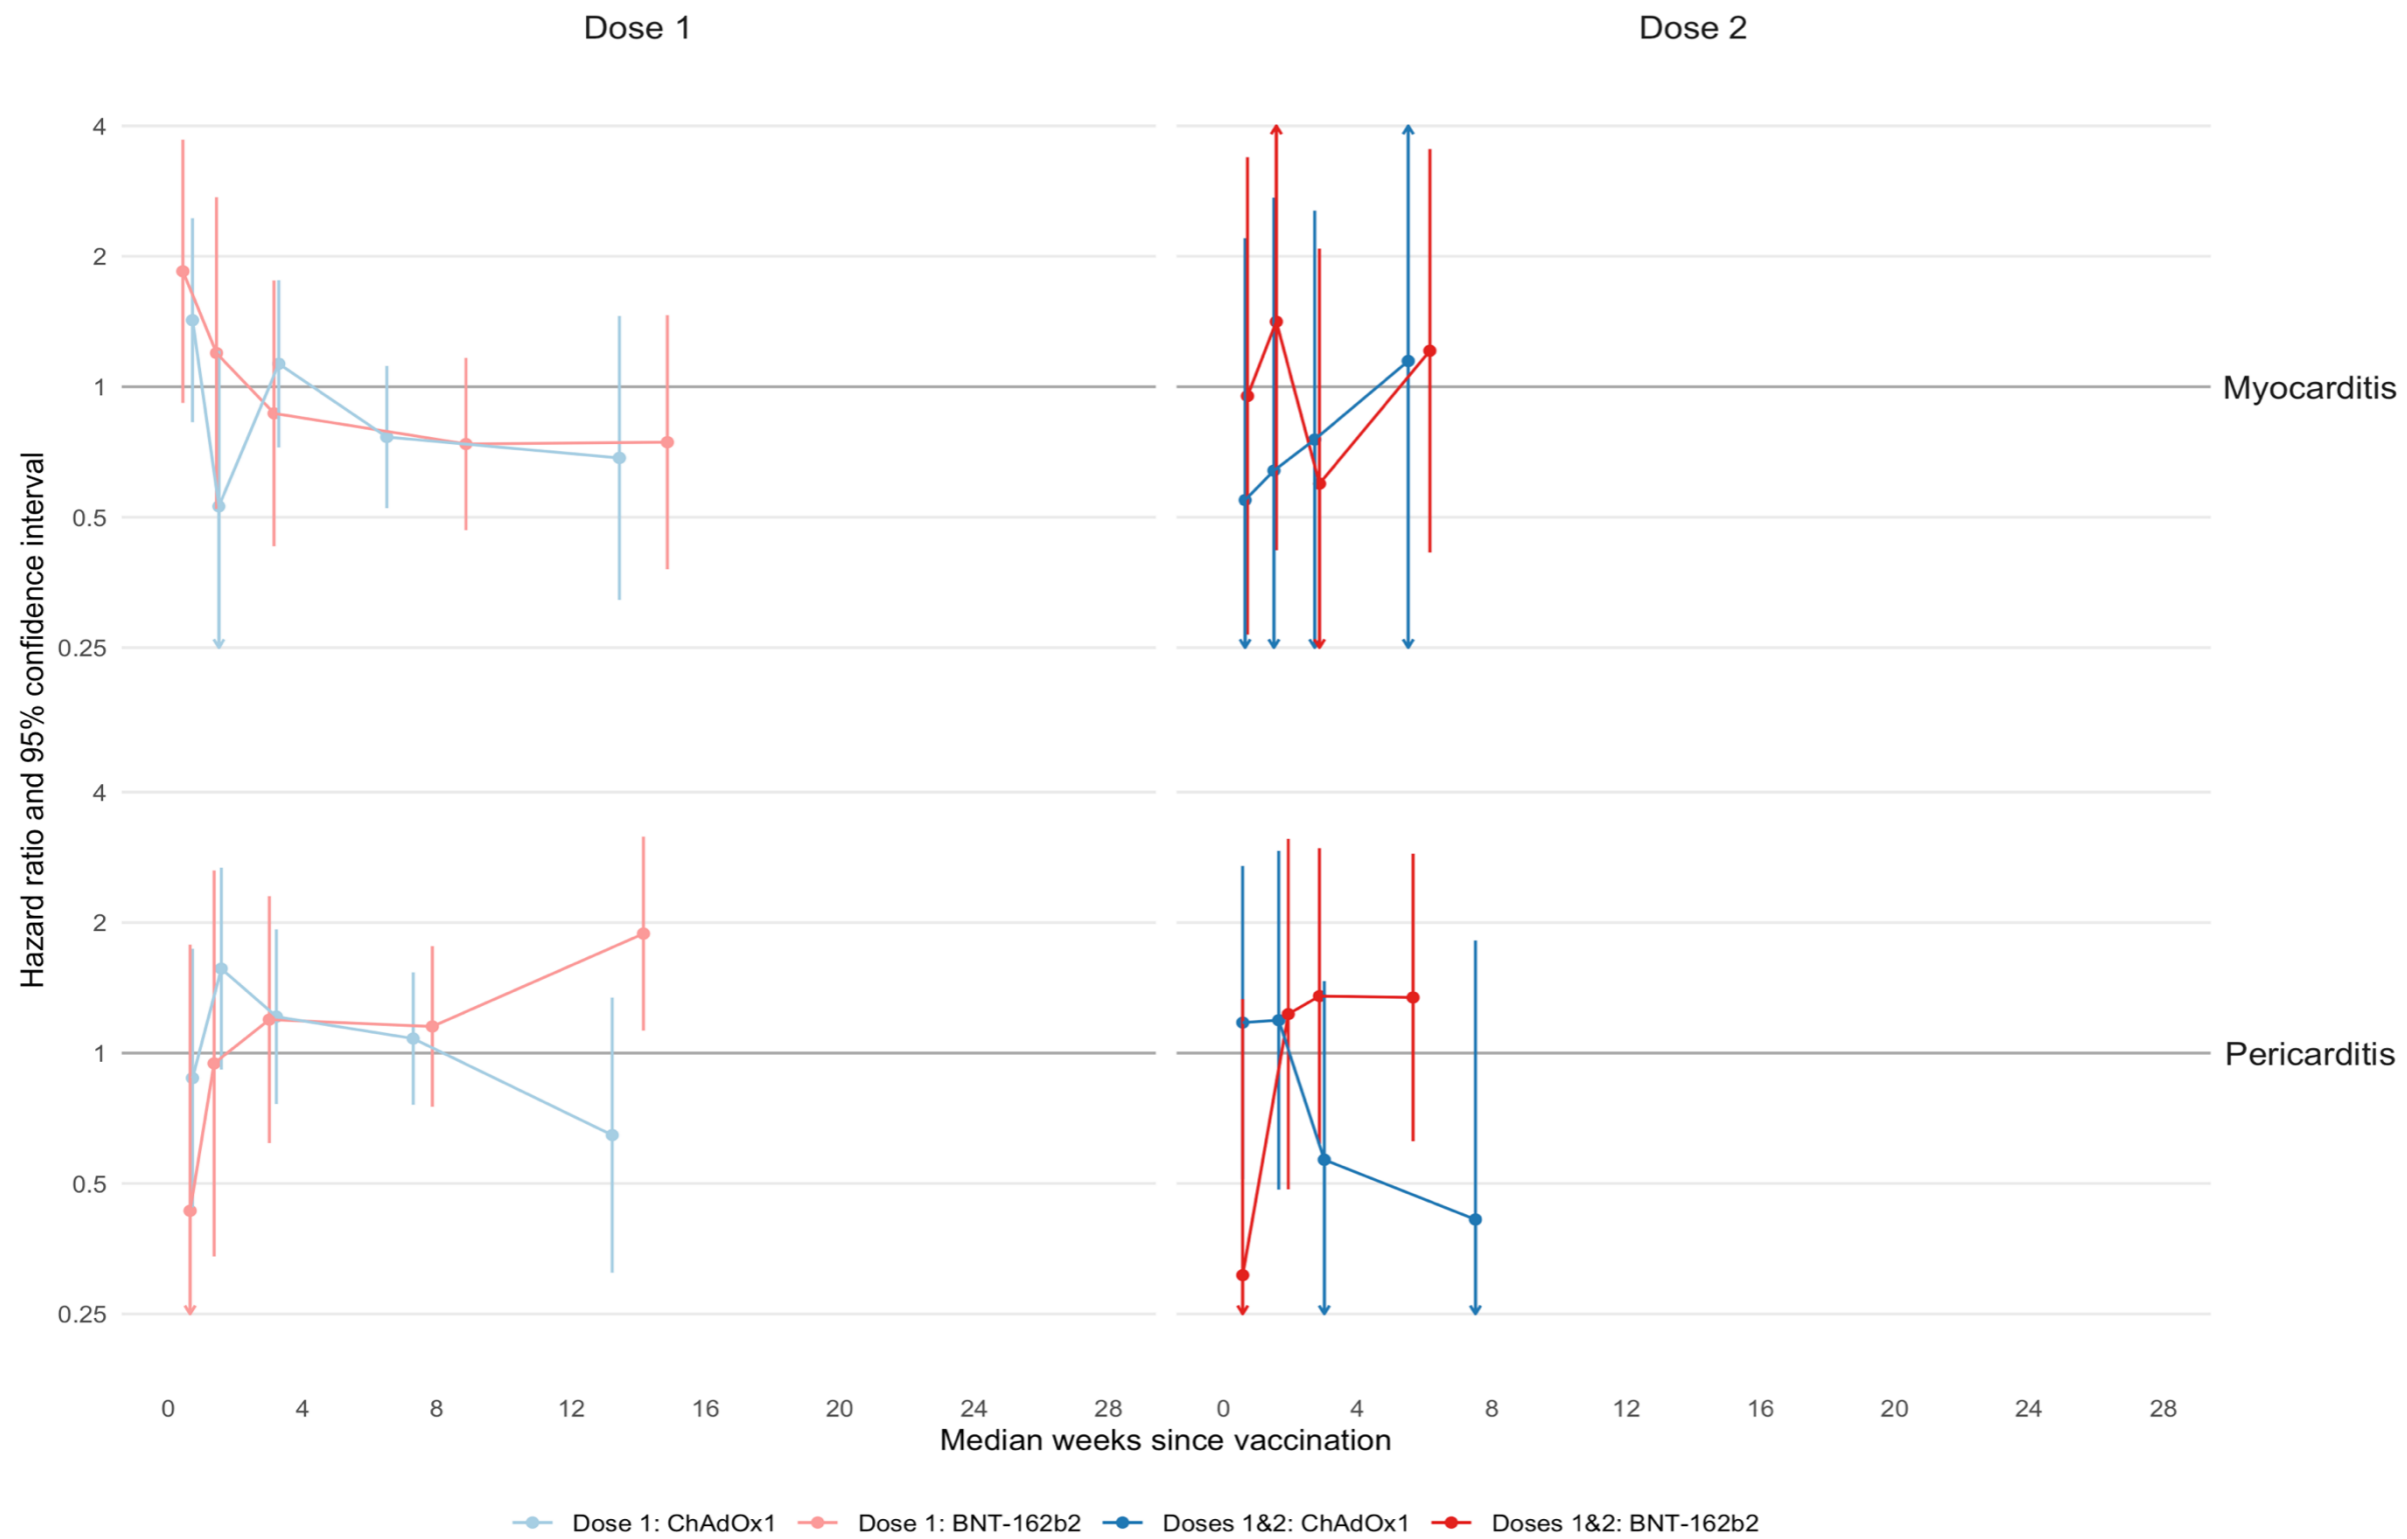

The number of people eligible for first and second dose analyses were 45,673,965; 28,549,265 respectively, until 17 May 2021.

The number of people who received a first dose of ChAdOx1, BNT-162b2 were 18,959,470 and 9,391,815, respectively; a second dose of ChAdOx1, BNT-162b2 were 7,992,035 and 8,133,695, respectively.

The numerical values of hazard ratios and 95% CIs are displayed in Supplementary Tables 30.
